# Supplementary material for: Synthesis of dithioacetals via gold-catalysed hydrothiolation of vinyl sulfides
Source: Royal Society of Chemistry journal article supplement (doi:10.1039/d2ob01737g), 2022-12-07
Supplement: d2ob01737g1.pdf [file d2ob01737g1.pdf]

## Supporting Information

# Synthesis of Dithioacetals via Gold-Catalyzed Hydrothiolation of Vinyl Sulfides

Venkatesh Murugesht<sup>‡a</sup>, Bokyeong Ryou<sup>‡a</sup> and Cheol-Min Park<sup>a\*</sup>

<sup>a</sup> Department of Chemistry, UNIST (Ulsan National Institute of Science & Technology), Ulsan 44919, Korea

<sup>‡</sup> These authors contributed equally to this work.

### TABLE OF CONTENTS

|                                                                   |           |
|-------------------------------------------------------------------|-----------|
| <b>1. General Information</b>                                     | <b>2</b>  |
| <b>2. Optimization of reaction conditions</b>                     | <b>3</b>  |
| <b>3. General procedure and characterization of Dithioacetals</b> | <b>4</b>  |
| <b>4. Synthesis of vinyl sulfides</b>                             | <b>17</b> |
| <b>5. References</b>                                              | <b>22</b> |
| <b>6. NMR spectra</b>                                             | <b>23</b> |

## 1. General Information

All reactions were conducted under a nitrogen atmosphere with oven-dried glassware and standard Schlenk or vacuum line techniques. Oil baths were used as a heat source for a reaction. All solutions were handled under nitrogen and transferred via syringe. Anhydrous solvents were purchased and stored over activated 4 Å molecular sieves. Unless otherwise stated, reagents were commercially available and used as purchased without further purification. Chemicals were purchased from Sigma-Aldrich, Acros, Alfa Aesar or TCI. Progress of reactions was monitored by thin-layer chromatography using Merck 60 F254 precoated silica gel plate and visualized by shortwave ultraviolet light as well as by treatment with basic solution of potassium permanganate. Flash chromatography was performed with Silica Flash P60 silica gel (230 – 400 mesh).  $^1\text{H}$  and  $^{13}\text{C}$  NMR spectra were obtained using an Agilent 400-MR DD2 Fourier-transform NMR spectrometer at 400 and 100 MHz, respectively. Chemical shifts were reported in units of parts per million (ppm) downfield from tetramethylsilane (TMS), and all coupling constants were reported in hertz. The residual solvent signals were taken as the reference ( $\text{CDCl}_3$ , 7.26 ppm for  $^1\text{H}$  NMR spectra and  $\text{CDCl}_3$ , 77.0 ppm for  $^{13}\text{C}$  NMR spectra). The signals observed are described as: s (singlet), d (doublet), t (triplet), q (quartet), m (multiplets). High resolution mass analysis was performed with JOEL AccuTOF 4G+ DART-HRMS and JMS-700. Systematic nomenclature for the compounds follows the numbering system as defined by IUPAC with assistance from CS Chemdraw® software.

## 2. Optimization of reaction conditions

An oven-dried reaction tube equipped with a magnetic stirrer bar, was charged with catalyst (x mol%) and degassed with N<sub>2</sub> then added the solvent (2 mL) and followed by the addition of benzenethiol **2a** (1.5 equiv., 0.3 mmol) and methyl 3-(decylthio)acrylate **1a** (0.2 mmol). The reaction mixture was stirred at room temperature according to optimization table. After the reaction completion, the reaction was filtered and solvent had been removed under reduced pressure. The residue was purified by flash column chromatography on silica gel to afford desired product methyl 3-(decylthio)-3-(phenylthio)propanoate **3aa**.

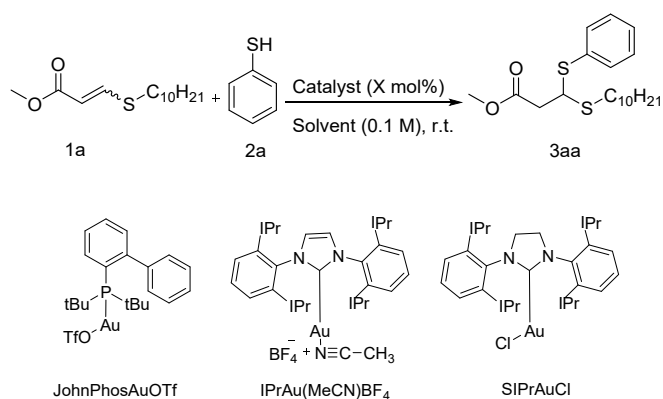

**Table S1. Optimization of the reaction conditions**

| Entry <sup>a</sup> | Cat (X mol%)                                     | Solvent | % Yield of <b>3aa</b> <sup>b</sup> |
|--------------------|--------------------------------------------------|---------|------------------------------------|
| 1                  | AgOTf (5 mol%)                                   | DCE     | -                                  |
| 2                  | AgNTf <sub>2</sub> (5 mol%)                      | DCE     | -                                  |
| 3                  | JohnPhosAuOTf (5 mol%) <sup>c</sup>              | DCE     | 79                                 |
| 4                  | IPrAu(MeCN)BF <sub>4</sub> (5 mol%) <sup>d</sup> | DCE     | -                                  |
| 5                  | SIPrAuCl (5 mol%) <sup>c</sup>                   | DCE     | -                                  |
| 6                  | NaAuCl <sub>4</sub> (5 mol%)                     | DCE     | -                                  |
| 7                  | AuCl <sub>3</sub> (5 mol%)                       | DCE     | -                                  |
| 8                  | PPh <sub>3</sub> AuCl (5 mol%)                   | DCE     | -                                  |
| 9                  | PPh <sub>3</sub> AuNTf <sub>2</sub> (5 mol%)     | DCE     | 82                                 |
| 10                 | PPh <sub>3</sub> AuNTf <sub>2</sub> (10 mol%)    | DCE     | 69                                 |
| 11                 | PPh <sub>3</sub> AuNTf <sub>2</sub> (2 mol%)     | DCE     | 88                                 |
| 12                 | PPh <sub>3</sub> AuNTf <sub>2</sub> (1 mol%)     | DCE     | 93                                 |
| 13                 | PPh <sub>3</sub> AuNTf <sub>2</sub> (1 mol%)     | DCM     | 85                                 |
| 14                 | PPh <sub>3</sub> AuNTf <sub>2</sub> (1 mol%)     | Toluene | -                                  |
| 15                 | PPh <sub>3</sub> AuNTf <sub>2</sub> (1 mol%)     | THF     | -                                  |
| 16                 | -                                                | DCE     | -                                  |

<sup>a</sup> Reaction conditions: **1a** (0.2 mmol), **2a** (0.3 mmol), solvent (2 mL), All the reactions were carried out closed reaction tubes at room temperature; <sup>b</sup> Yields are for isolated products; <sup>c</sup> in situ generated from 5 mol% JohnPhosAuCl and 5 mol% AgOTf; <sup>d</sup> IPrAu(MeCN)BF<sub>4</sub>: 1,3-Bis(2,6-di-*i*-propylphenyl)imidazol-2-ylidene(acetonitrile)gold(I) tetrafluoroborate; <sup>e</sup> SIPrAuCl: Chloro{1,3-bis[2,6-di-*i*-propylphenyl]-4,5-dihydroimidazol-2-ylidene}gold(I); DCE: 1,2-Dichloroethane; DCM: Dichloromethane; THF: Tetrahydrofuran

### 3. General procedure and characterization of Dithioacetals

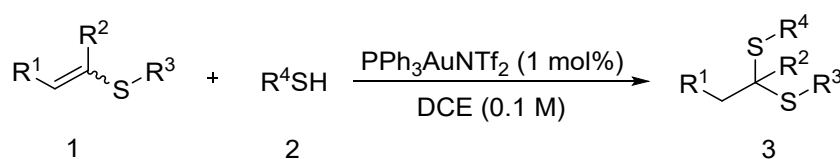

*General procedure (A)* : An oven-dried reaction tube equipped with a magnetic stirrer bar, was charged with PPh<sub>3</sub>AuNTf<sub>2</sub> (1 mol%) and degassed with N<sub>2</sub> then added DCE (0.1 M, 2 mL) and followed by the addition of thiol (1.5 equiv., 0.3 mmol) and vinyl sulfide (0.2 mmol). The reaction mixture was stirred until alkene was consumed. After the reaction completion, the reaction mixture was filtered and solvent had been removed under reduced pressure. The residue was purified by flash column chromatography on silica gel to afford dithioacetal derivatives.

#### Methyl 3-(decylthio)-3-(phenylthio)propanoate (**3aa**)

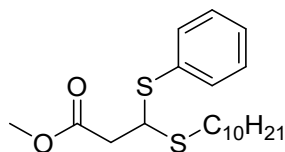

Prepared according to General procedure (A) using methyl 3-(decylthio)acrylate **1a** and benzenethiol **2a** at r.t., 2 h, 93% yield; Colorless oil; <sup>1</sup>H NMR (400 MHz, CDCl<sub>3</sub>) δ 7.50 (d, J = 6.9 Hz, 2H), 7.38 – 7.30 (m, 3H), 4.50 (t, J = 7.5 Hz, 1H), 3.69 (s, 3H), 2.88 – 2.66 (m, 4H), 1.67 – 1.56 (m, 2H), 1.42 – 1.23 (m, 14H), 0.88 (t, J = 6.6 Hz, 3H); <sup>13</sup>C NMR (100 MHz, CDCl<sub>3</sub>) δ 170.5, 133.7, 133.0, 128.9, 128.2, 51.9, 50.3, 41.4, 31.9, 31.7, 29.5, 29.5, 29.3, 29.2, 29.1, 28.9, 22.7, 14.1; HRMS (ESI) m/z calcd. for C<sub>20</sub>H<sub>32</sub>NaO<sub>2</sub>S<sub>2</sub><sup>+</sup> ([M+Na]<sup>+</sup>)

391.1736, found 391.1737.

### Methyl 3-((2-bromophenyl)thio)-3-(decylthio)propanoate (3ab)

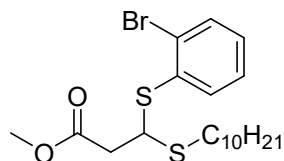

Prepared according to General procedure (A) using methyl 3-(decylthio)acrylate **1a** and 2-bromobenzenethiol **2b** at r.t., 2 h, 93% yield; Colorless oil;  $^1\text{H NMR}$  (400 MHz,  $\text{CDCl}_3$ )  $\delta$  7.60 (d,  $J = 7.9$  Hz, 1H), 7.54 (d,  $J = 7.7$  Hz, 1H), 7.34 – 7.25 (m, 1H), 7.14 (t,  $J = 7.6$  Hz, 1H), 4.68 (dd,  $J = 9.0, 5.6$  Hz, 1H), 3.67 (s, 3H), 2.90 (dd,  $J = 16.0, 5.6$  Hz, 1H), 2.86 – 2.77 (m, 2H), 2.77 – 2.67 (m, 1H), 1.61 (dd,  $J = 13.4, 5.8$  Hz, 2H), 1.42 – 1.23 (m, 14H), 0.88 (t,  $J = 6.7$  Hz, 3H);  $^{13}\text{C NMR}$  (100 MHz,  $\text{CDCl}_3$ )  $\delta$  170.4, 135.3, 133.6, 133.4, 129.0, 127.9, 127.2, 52.0, 49.1, 41.3, 31.9, 31.7, 29.5, 29.5, 29.3, 29.2, 29.1, 28.8, 22.7, 14.1; HRMS (ESI)  $m/z$  calcd. for  $\text{C}_{20}\text{H}_{31}\text{BrNaO}_2\text{S}_2^+$  ( $[\text{M}+\text{Na}]^+$ ) 469.0841, found 469.0845.

### Methyl 3-((4-bromophenyl)thio)-3-(decylthio)propanoate (3ac)

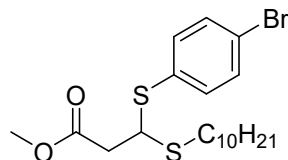

Prepared according to General procedure (A) using methyl 3-(decylthio)acrylate **1a** and 4-bromobenzenethiol **2c** at r.t., 2 h, 95% yield; Colorless oil;  $^1\text{H NMR}$  (400 MHz,  $\text{CDCl}_3$ )  $\delta$  7.45 (d,  $J = 8.4$  Hz, 2H), 7.36 (d,  $J = 8.4$  Hz, 2H), 4.47 (t,  $J = 7.4$  Hz, 1H), 3.69 (s, 3H), 2.85 – 2.71 (m, 3H), 2.72 – 2.63 (m, 1H), 1.66 – 1.53 (m, 2H), 1.40 – 1.26 (m, 14H), 0.88 (t,  $J = 6.7$  Hz, 3H);  $^{13}\text{C NMR}$  (100 MHz,  $\text{CDCl}_3$ )  $\delta$  170.3, 135.2, 132.0, 131.9, 122.7, 52.0, 50.4, 41.2, 31.8, 31.6, 29.5, 29.5, 29.3, 29.1, 29.0, 28.8, 22.6, 14.1; HRMS (ESI)  $m/z$  calcd. for  $\text{C}_{20}\text{H}_{31}\text{BrNaO}_2\text{S}_2^+$  ( $[\text{M}+\text{Na}]^+$ ) 469.0841, found 469.0834

### Methyl 3-((4-chlorophenyl)thio)-3-(decylthio)propanoate (3ad)

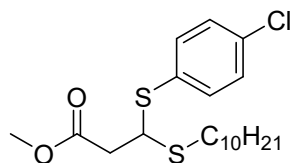

Prepared according to General procedure (A) using methyl 3-(decylthio)acrylate **1a** and 4-chlorobenzenethiol **2d** at r.t., 2 h, 94% yield; Colorless oil;  $^1\text{H NMR}$  (400 MHz,  $\text{CDCl}_3$ )  $\delta$  7.43 (d,  $J = 8.4$  Hz, 2H), 7.30 (d,  $J = 8.4$  Hz, 2H), 4.46 (t,  $J = 7.4$  Hz, 1H), 3.69 (s, 3H), 2.82 – 2.72 (m, 3H), 2.71 – 2.63 (m, 1H), 1.59 (p,  $J = 7.5, 7.1$  Hz, 2H), 1.40 – 1.25 (m, 14H), 0.88 (t,  $J = 6.7$  Hz, 3H);  $^{13}\text{C NMR}$  (100 MHz,  $\text{CDCl}_3$ )  $\delta$  170.3, 135.1, 134.6, 131.2, 129.1, 52.0, 50.6, 41.2, 31.8, 31.6, 29.5, 29.5, 29.3, 29.1, 29.0, 28.8, 22.6, 14.1; HRMS (ESI)  $m/z$  calcd. for  $\text{C}_{20}\text{H}_{31}\text{ClNaO}_2\text{S}_2^+$  ( $[\text{M}+\text{Na}]^+$ ) 425.1346, found 425.1344

### Methyl 3-(decylthio)-3-((2-methoxyphenyl)thio)propanoate (**3ae**)

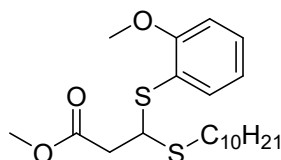

Prepared according to General procedure (A) using methyl 3-(decylthio)acrylate **1a** and 2-methoxybenzenethiol **2e** at r.t., 2 h, 79% yield; Colorless oil;  $^1\text{H NMR}$  (400 MHz,  $\text{CDCl}_3$ )  $\delta$  7.46 – 7.42 (m, 1H), 7.32 – 7.25 (m, 1H), 6.94 – 6.87 (m, 2H), 4.67 (dd,  $J = 9.1, 5.6$  Hz, 1H), 3.89 (s, 3H), 3.64 (s, 3H), 2.88 – 2.80 (m, 2H), 2.76 – 2.66 (m, 2H), 1.66 – 1.57 (m, 2H), 1.41 – 1.24 (m, 14H), 0.88 (t,  $J = 6.8$  Hz, 3H);  $^{13}\text{C NMR}$  (100 MHz,  $\text{CDCl}_3$ )  $\delta$  170.7, 159.1, 134.9, 129.8, 121.5, 120.9, 110.9, 55.7, 51.8, 47.9, 41.5, 31.9, 31.5, 29.5, 29.5, 29.3, 29.2, 29.2, 28.9, 22.6, 14.1; HRMS (ESI)  $m/z$  calcd. for  $\text{C}_{21}\text{H}_{34}\text{NaO}_3\text{S}_2^+$  ( $[\text{M}+\text{Na}]^+$ ) 421.1842, found 421.1842

### Methyl 3-(decylthio)-3-((4-methoxyphenyl)thio)propanoate (**3af**)

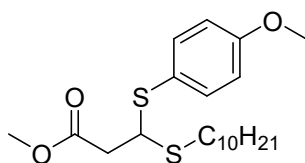

Prepared according to General procedure (A) using methyl 3-(decylthio)acrylate **1a** and 4-methoxybenzenethiol **2f** at r.t., 2 h, 81% yield; Colorless oil,  $^1\text{H NMR}$  (400 MHz,  $\text{CDCl}_3$ )  $\delta$  7.45 (d,  $J = 8.8$  Hz, 2H), 6.87 (d,  $J = 8.8$  Hz, 2H), 4.35 (t,  $J = 7.5$  Hz, 1H), 3.81 (s, 3H), 3.69 (s, 3H), 2.84 – 2.74 (m, 2H), 2.71 – 2.64 (m, 2H), 1.60 (ddt,  $J = 14.9, 9.4, 3.6$  Hz, 2H), 1.44 – 1.22 (m, 14H), 0.88 (t,  $J = 6.7$  Hz, 3H);  $^{13}\text{C NMR}$  (100 MHz,  $\text{CDCl}_3$ )  $\delta$  170.6, 160.2, 136.9, 122.7, 114.4, 55.3, 51.9, 51.1, 41.2, 31.9, 31.6, 29.5, 29.5, 29.3, 29.2, 29.1, 28.9, 22.6, 14.1; HRMS (ESI)  $m/z$  calcd. for  $\text{C}_{21}\text{H}_{34}\text{NaO}_3\text{S}_2^+$  ( $[\text{M}+\text{Na}]^+$ ) 421.1842, found 421.1842

### Methyl 3-(decylthio)-3-(*p*-tolylthio)propanoate (**3ag**)

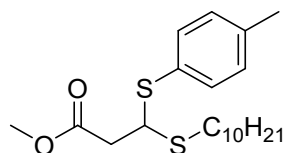

Prepared according to General procedure (A) using methyl 3-(decylthio)acrylate **1a** and 4-methylbenzenethiol **2g** at r.t., 2 h, 68% yield; Colorless oil;  $^1\text{H NMR}$  (400 MHz,  $\text{CDCl}_3$ )  $\delta$  7.39 (d,  $J = 7.5$  Hz, 2H), 7.15 (d,  $J = 7.7$  Hz, 2H), 4.43 (t,  $J = 7.3$  Hz, 1H), 3.69 (s, 3H), 2.85 – 2.76 (m, 2H), 2.74 – 2.64 (m, 2H), 2.35 (s, 3H), 1.66 – 1.58 (m, 2H), 1.38 – 1.26 (m, 14H), 0.88 (t,  $J = 6.5$  Hz, 3H);  $^{13}\text{C NMR}$  (100 MHz,  $\text{CDCl}_3$ )  $\delta$  170.6, 138.6, 134.4, 129.7, 129.0, 51.9, 50.6, 41.3, 31.9, 31.6, 29.5, 29.5, 29.3, 29.2, 29.1, 28.9, 22.7, 21.2, 14.1; HRMS (ESI)  $m/z$  calcd. for  $\text{C}_{21}\text{H}_{34}\text{NaO}_2\text{S}_2^+$  ( $[\text{M}+\text{Na}]^+$ ) 405.1892, found 405.1892

### Methyl 3-(decylthio)-3-((4-(trifluoromethyl)phenyl)thio)propanoate (**3ah**)

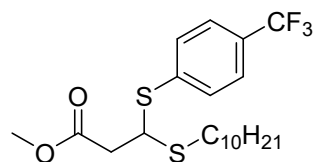

Prepared according to General procedure (A) using methyl 3-(decylthio)acrylate **1a** and 4-(trifluoromethyl)benzenethiol **2h** at r.t., 2 h, 88% yield; Colorless oil;  $^1\text{H NMR}$  (400 MHz,  $\text{CDCl}_3$ )  $\delta$  7.57 (s, 4H), 4.62 (dd,  $J = 7.9, 6.8$  Hz, 1H), 3.70 (s, 3H), 2.91 – 2.77 (m, 2H), 2.81 – 2.72 (m, 1H), 2.73 – 2.63 (m, 1H), 1.60 (dt,  $J = 14.8, 6.8$  Hz, 2H), 1.44 – 1.24 (m, 14H), 0.88 (t,  $J = 6.8$  Hz, 3H);  $^{13}\text{C NMR}$  (100 MHz,  $\text{CDCl}_3$ )  $\delta$  170.2, 138.7, 131.9, 129.54 (q,  $J = 32.7$

Hz), 125.71 (q,  $J = 3.7$  Hz), 123.91 (q,  $J = 272.2$  Hz), 52.0, 49.6, 41.3, 31.9, 31.7, 29.5, 29.5, 29.3, 29.1, 29.0, 28.8, 22.6, 14.1; HRMS (ESI)  $m/z$  calcd. for  $C_{21}H_{31}F_3NaO_2S_2^+$  ( $[M+Na]^+$ ) 459.1610, found 459.1608

### Methyl 3-(decylthio)-3-(naphthalen-2-ylthio)propanoate (3ai)

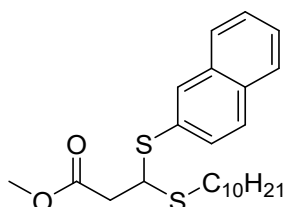

Prepared according to General procedure (A) using methyl 3-(decylthio)acrylate **1a** and naphthalene-2-thiol **2i** at r.t., 2 h, 76% yield; Colorless oil;  $^1H$  NMR (400 MHz,  $CDCl_3$ )  $\delta$  7.98 (s, 1H), 7.86 – 7.75 (m, 3H), 7.59 – 7.53 (m, 1H), 7.49 (dt,  $J = 9.4, 4.8$  Hz, 2H), 4.61 (dd,  $J = 8.2, 6.6$  Hz, 1H), 3.67 (s, 3H), 3.03 – 2.59 (m, 4H), 1.61 (p,  $J = 8.1$  Hz, 2H), 1.43 – 1.22 (m, 14H), 0.88 (t,  $J = 6.8$  Hz, 3H);  $^{13}C$  NMR (100 MHz,  $CDCl_3$ )  $\delta$  170.6, 133.5, 132.7, 130.6, 130.4, 128.5, 127.7, 127.7, 126.6, 126.6, 52.0, 50.3, 41.5, 31.9, 31.8, 29.5, 29.5, 29.3, 29.2, 28.9, 22.7, 14.1; HRMS (ESI)  $m/z$  calcd. for  $C_{24}H_{34}NaO_2S_2^+$  ( $[M+Na]^+$ ) 441.1892, found 441.1893

### Methyl 3-(decylthio)-3-(thiophen-2-ylthio)propanoate (3aj)

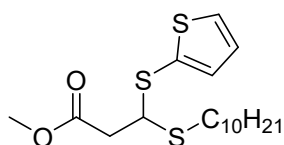

Prepared according to General procedure (A) using methyl 3-(decylthio)acrylate **1a** and thiophene-2-thiol **2j** at 50 °C, overnight, 43% yield; Colorless oil;  $^1H$  NMR (400 MHz,  $CDCl_3$ )  $\delta$  7.45 (d,  $J = 5.3$  Hz, 1H), 7.24 – 7.18 (m, 1H), 7.08 – 7.00 (m, 1H), 4.32 (t,  $J = 7.1$  Hz, 1H), 3.71 (s, 3H), 2.83 (td,  $J = 13.9, 12.2, 7.0$  Hz, 2H), 2.69 (dd,  $J = 14.9, 7.7$  Hz, 2H), 1.63 (dt,  $J = 13.8, 6.8$  Hz, 2H), 1.46 – 1.23 (m, 14H), 0.88 (t,  $J = 6.0$  Hz, 3H);  $^{13}C$  NMR (100 MHz,  $CDCl_3$ )  $\delta$  170.4, 136.7, 131.3, 129.9, 127.6, 52.3, 52.0, 40.9, 31.9, 31.9, 29.5, 29.5, 29.3, 29.2, 29.0, 28.9, 22.7, 14.1; HRMS (ESI)  $m/z$  calcd. for  $C_{18}H_{30}NaO_2S_3^+$  ( $[M+Na]^+$ ) 397.1300, found 397.1302



### Methyl 3-(cyclohexylthio)-3-(phenylthio)propanoate (3ba)

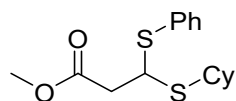

Prepared according to General procedure (A) using methyl 3-(cyclohexylthio)acrylate **1b** and benzenethiol **2a** at r.t., 4 h, 95% yield; Colorless oil;  $^1\text{H NMR}$  (400 MHz,  $\text{CDCl}_3$ )  $\delta$  7.50 (d,  $J = 6.8$  Hz, 2H), 7.33 (d,  $J = 6.3$  Hz, 3H), 4.57 (t,  $J = 7.3$  Hz, 1H), 3.68 (s, 3H), 3.00 (td,  $J = 10.1, 4.6$  Hz, 1H), 2.83 (dd,  $J = 15.8, 6.3$  Hz, 1H), 2.70 (dd,  $J = 15.8, 8.4$  Hz, 1H), 2.11 – 1.90 (m, 2H), 1.80 – 1.69 (m, 2H), 1.67 – 1.49 (m, 1H), 1.42 – 1.32 (m, 3H), 1.30 – 1.22 (m, 2H);  $^{13}\text{C NMR}$  (100 MHz,  $\text{CDCl}_3$ )  $\delta$  170.6, 133.6, 133.2, 129.0, 128.2, 51.9, 48.6, 44.2, 41.6, 33.6, 33.1, 26.0, 25.8, 25.7; HRMS (ESI)  $m/z$  calcd. for  $\text{C}_{16}\text{H}_{22}\text{NaO}_2\text{S}_2^+$  ( $[\text{M}+\text{Na}]^+$ ) 333.0953, found 333.0957

### Methyl 3-(tert-butylthio)-3-(phenylthio)propanoate (3ca)

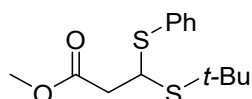

Prepared according to General procedure (A) using methyl 3-(tert-butylthio)acrylate **1c** and benzenethiol **2a** at r.t., 3 h, 87% yield; Colorless oil;  $^1\text{H NMR}$  (400 MHz,  $\text{CDCl}_3$ )  $\delta$  7.50 (d,  $J = 7.5$  Hz, 2H), 7.38 – 7.27 (m, 3H), 4.54 (dd,  $J = 9.1, 5.5$  Hz, 1H), 3.67 (s, 3H), 2.85 (dd,  $J = 16.2, 5.2$  Hz, 1H), 2.71 (dd,  $J = 15.4, 9.2$  Hz, 1H), 1.40 (s, 9H);  $^{13}\text{C NMR}$  (100 MHz,  $\text{CDCl}_3$ )  $\delta$  170.7, 134.3, 133.0, 129.0, 128.0, 51.8, 46.6, 45.0, 42.8, 31.1; HRMS (ESI)  $m/z$  calcd. for  $\text{C}_{14}\text{H}_{20}\text{NaO}_2\text{S}_2^+$  ( $[\text{M}+\text{Na}]^+$ ) 307.0797, found 307.0794

### Methyl 3-(benzylthio)-3-(phenylthio)propanoate (3da)

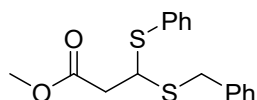

Prepared according to General procedure (A) using methyl 3-(benzylthio)acrylate **1d** and benzenethiol **2a** at 50 °C, 2 h, 70% yield, Colorless oil;  $^1\text{H NMR}$  (400 MHz,  $\text{CDCl}_3$ )  $\delta$  7.44 (dd,  $J = 6.3, 2.8$  Hz, 3H), 7.31 (dd,  $J = 6.0, 2.9$  Hz, 11H), 7.29 – 7.23 (m, 3H), 4.34 (t,  $J = 7.4$  Hz, 1H), 4.05 – 3.84 (m, 2H), 3.62 (s, 4H), 2.78 (dd,  $J = 15.8, 7.0$  Hz, 1H), 2.69 (dd,  $J = 15.9, 7.9$  Hz, 1H);  $^{13}\text{C NMR}$  (100 MHz,  $\text{CDCl}_3$ )  $\delta$  170.2, 137.2, 133.7, 132.6, 129.1, 129.0, 128.6,

128.3, 127.3, 51.9, 49.4, 41.1, 36.0; HRMS (ESI)  $m/z$  calcd. for  $C_{17}H_{18}NaO_2S_2^+$  ( $[M+Na]^+$ ) 341.0640, found 341.0636

### Methyl 3,3-bis(decylthio)propanoate (3ak)

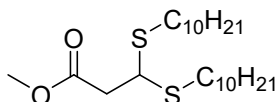

Prepared according to General procedure (A) using methyl 3-(decylthio)acrylate **1a** and decane-1-thiol **2k** at r.t., 2 h, 84% yield; Colorless oil;  $^1H$  NMR (400 MHz,  $CDCl_3$ )  $\delta$  4.21 (t,  $J = 7.6$  Hz, 1H), 3.72 (s, 3H), 2.81 (d,  $J = 7.6$  Hz, 2H), 2.72 – 2.63 (m, 2H), 2.62 – 2.54 (m, 2H), 1.58 (q,  $J = 9.1, 8.0$  Hz, 4H), 1.41 – 1.24 (m, 28H), 0.88 (t,  $J = 6.7$  Hz, 6H);  $^{13}C$  NMR (100 MHz,  $CDCl_3$ )  $\delta$  170.6, 51.9, 47.1, 41.7, 31.9, 30.4, 29.5, 29.5, 29.3, 29.2, 29.2, 29.0, 22.7, 14.1; HRMS (ESI)  $m/z$  calcd. for  $C_{24}H_{48}NaO_2S_2^+$  ( $[M+Na]^+$ ) 455.2988, found 455.2981

### Methyl 3-(cyclohexylthio)-3-(decylthio)propanoate (3al)

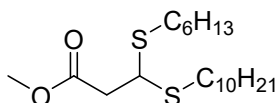

Prepared according to General procedure (A) using methyl 3-(decylthio)acrylate **1a** and hexane-1-thiol **2l** at r.t., 6 h, 71% yield; Colorless oil;  $^1H$  NMR (400 MHz,  $CDCl_3$ )  $\delta$  4.21 (t,  $J = 7.6$  Hz, 1H), 3.72 (s, 3H), 2.81 (d,  $J = 7.6$  Hz, 2H), 2.68 (dt,  $J = 14.2, 7.4$  Hz, 2H), 2.62 – 2.54 (m, 2H), 1.59 (p,  $J = 7.2$  Hz, 4H), 1.43 – 1.26 (m, 20H), 0.92 – 0.86 (m, 6H);  $^{13}C$  NMR (100 MHz,  $CDCl_3$ )  $\delta$  170.6, 51.9, 47.1, 41.7, 31.9, 31.4, 30.4, 29.5, 29.5, 29.3, 29.2, 29.2, 28.9, 28.6, 22.6, 22.5, 14.1, 14.0; HRMS (ESI)  $m/z$  calcd. for  $C_{20}H_{40}NaO_2S_2^+$  ( $[M+Na]^+$ ) 399.2362, found 399.2400

### Methyl 3-(benzylthio)-3-(decylthio)propanoate (3am)

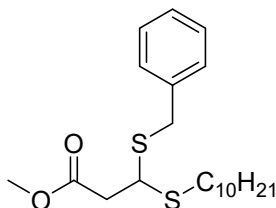

Prepared according to General procedure (A) using methyl 3-(decylthio)acrylate **1a** and phenylmethanethiol **2m** at r.t., 4 h, 63% yield; Colorless oil; **<sup>1</sup>H NMR** (400 MHz, CDCl<sub>3</sub>) δ 7.38 – 7.27 (m, 4H), 7.28 – 7.19 (m, 1H), 4.09 (t, J = 7.6 Hz, 1H), 3.93 – 3.76 (m, 2H), 3.68 (s, 3H), 2.77 (d, J = 7.6 Hz, 2H), 2.62 (dt, J = 12.5, 7.4 Hz, 1H), 2.53 (dt, J = 12.4, 7.5 Hz, 1H), 1.53 (p, J = 7.3 Hz, 2H), 1.39 – 1.24 (m, 14H), 0.88 (t, J = 6.8 Hz, 3H); **<sup>13</sup>C NMR** (100 MHz, CDCl<sub>3</sub>) δ 170.4, 137.7, 129.0, 128.5, 127.1, 51.9, 46.6, 41.5, 35.1, 31.9, 30.3, 29.6, 29.5, 29.3, 29.2, 29.2, 29.0, 22.7, 14.1; HRMS (ESI) m/z calcd. for C<sub>21</sub>H<sub>34</sub>NaO<sub>2</sub>S<sub>2</sub><sup>+</sup> ([M+Na]<sup>+</sup>) 405.1892, found 405.1897

### Methyl 3-(cyclohexylthio)-3-(decylthio)propanoate (**3an**)

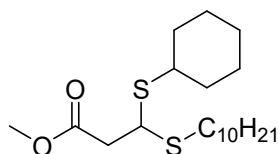

Prepared according to General procedure (A) using methyl 3-(decylthio)acrylate **1a** and cyclohexanethiol **2n** at r.t., 3 h, 42% yield; Colorless oil; **<sup>1</sup>H NMR** (400 MHz, CDCl<sub>3</sub>) δ 4.27 (t, J = 7.5 Hz, 1H), 3.72 (s, 3H), 2.88 (tt, J = 10.0, 3.9 Hz, 1H), 2.81 (d, J = 7.6 Hz, 2H), 2.71 – 2.56 (m, 2H), 1.97 (ddd, J = 20.2, 9.9, 4.7 Hz, 2H), 1.75 (dt, J = 9.5, 4.5 Hz, 2H), 1.59 (p, J = 7.6, 7.1 Hz, 3H), 1.44 – 1.20 (m, 19H), 0.88 (t, J = 6.6 Hz, 3H); **<sup>13</sup>C NMR** (100 MHz, CDCl<sub>3</sub>) δ 170.7, 51.9, 45.6, 43.4, 42.2, 33.8, 33.5, 31.9, 30.2, 29.5, 29.5, 29.3, 29.3, 29.2, 28.9, 26.1, 25.8, 25.7, 22.7, 14.1; HRMS (ESI) m/z calcd. for C<sub>20</sub>H<sub>38</sub>NaO<sub>2</sub>S<sub>2</sub><sup>+</sup> ([M+Na]<sup>+</sup>) 397.2205, found 397.2202

### Decyl(1-(phenylthio)octyl)sulfane (**3ea**)

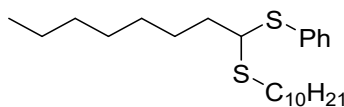

Prepared according to General procedure (A) using decyl(oct-1-en-1-yl)sulfane **1e** and benzenethiol **2a** at reflux, 10 h, 38% yield; Colorless oil; **<sup>1</sup>H NMR** (400 MHz, CDCl<sub>3</sub>) δ 7.50 – 7.42 (m, 2H), 7.35 – 7.23 (m, 3H), 4.08 (t, J = 6.7 Hz, 1H), 2.76 (dt, J = 12.5, 7.3 Hz, 1H), 2.65 (dt, J = 12.5, 7.5 Hz, 1H), 1.90 – 1.69 (m, 2H), 1.63 – 1.52 (m, 4H), 1.41 – 1.24 (m, 22H), 0.92 – 0.83 (m, 6H); **<sup>13</sup>C NMR** (100 MHz, CDCl<sub>3</sub>) δ 134.6, 132.9, 128.8, 127.5, 55.4, 36.0,

31.9, 31.7, 31.3, 29.6, 29.5, 29.3, 29.2, 29.1, 29.1, 29.0, 27.1, 22.7, 22.6, 14.1, 14.1.; HRMS (ESI)  $m/z$  calcd. for  $C_{24}H_{42}NaS_2^+$  ( $[M+Na]^+$ ) 417.2620, found 417.2623

### Octane-1,1-diylbis(decylsulfane) (3ek)

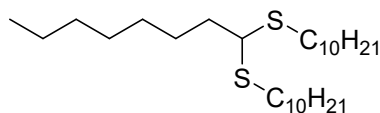

Prepared according to General procedure (A) using decyl(oct-1-en-1-yl)sulfane **1e** and decane-1-thiol **2k** at reflux, 20 h, 74% yield; Colorless oil;  $^1H$  NMR (400 MHz,  $CDCl_3$ )  $\delta$  3.73 (t,  $J = 7.0$  Hz, 1H), 2.65 (dt,  $J = 14.5, 7.4$  Hz, 2H), 2.54 (dt,  $J = 12.4, 7.4$  Hz, 2H), 1.77 (q,  $J = 7.3$  Hz, 2H), 1.55 (dp,  $J = 15.3, 7.6, 7.2$  Hz, 6H), 1.43 – 1.22 (m, 36H), 0.88 (t,  $J = 6.8$  Hz, 9H);  $^{13}C$  NMR (100 MHz,  $CDCl_3$ )  $\delta$  52.0, 36.1, 31.9, 31.8, 30.0, 29.6, 29.5, 29.4, 29.3, 29.2, 29.1, 29.1, 29.1, 27.5, 22.7, 22.6, 14.1, 14.1; HRMS (ESI)  $m/z$  calcd. for  $C_{28}H_{58}NaS_2^+$  ( $[M+Na]^+$ ) 481.3872, found 481.3873

### Benzyl(1-(decylthio)octyl)sulfane (3em)

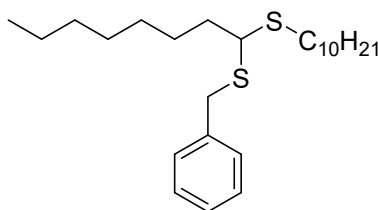

Prepared according to General procedure (A) using decyl(oct-1-en-1-yl)sulfane **1e** and phenylmethanethiol **2m** at reflux, 1 h, 36% yield; Colorless oil;  $^1H$  NMR (400 MHz,  $CDCl_3$ )  $\delta$  7.35 – 7.20 (m, 5H), 3.91 – 3.73 (m, 2H), 3.58 (t,  $J = 7.0$  Hz, 1H), 2.65 – 2.47 (m, 2H), 1.75 (q,  $J = 7.4$  Hz, 2H), 1.54 (dd,  $J = 14.3, 6.8$  Hz, 2H), 1.45 (td,  $J = 6.9, 3.9$  Hz, 2H), 1.36 (dd,  $J = 8.4, 5.2$  Hz, 2H), 1.31 – 1.23 (m, 20H), 0.88 (td,  $J = 6.8, 4.2$  Hz, 6H);  $^{13}C$  NMR (100 MHz,  $CDCl_3$ )  $\delta$  138.3, 129.0, 128.4, 126.9, 51.2, 35.8, 34.8, 31.9, 31.8, 29.8, 29.6, 29.5, 29.4, 29.3, 29.2, 29.1, 29.1, 29.0, 27.3, 22.7, 22.6, 14.1, 14.1; HRMS (ESI)  $m/z$  calcd. for  $C_{25}H_{44}NaS_2^+$  ( $[M+Na]^+$ ) 431.2777, found 431.2771

### Cyclohexyl(1-(decylthio)octyl)sulfane (3en)

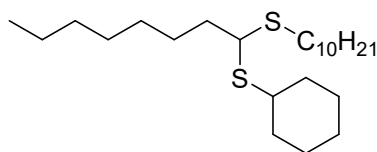

Prepared according to General procedure (A) using decyl(oct-1-en-1-yl)sulfane **1e** and cyclohexanethiol **2n** at reflux, 20 h, 35% yield; Colorless oil;  $^1\text{H NMR}$  (400 MHz,  $\text{CDCl}_3$ )  $\delta$  3.81 (t,  $J = 6.9$  Hz, 1H), 2.88 (tt,  $J = 9.9, 3.9$  Hz, 1H), 2.64 (dt,  $J = 12.4, 7.4$  Hz, 1H), 2.56 (dt,  $J = 12.4, 7.4$  Hz, 1H), 1.96 (ddd,  $J = 21.6, 10.0, 4.7$  Hz, 2H), 1.83 – 1.73 (m, 3H), 1.63 – 1.48 (m, 5H), 1.44 – 1.22 (m, 28H), 0.88 (t,  $J = 6.6$  Hz, 6H);  $^{13}\text{C NMR}$  (100 MHz,  $\text{CDCl}_3$ )  $\delta$  50.4, 42.9, 36.6, 34.1, 33.7, 31.9, 31.8, 29.8, 29.6, 29.5, 29.5, 29.3, 29.3, 29.2, 29.1, 29.0, 27.4, 26.1, 25.9, 25.8, 22.7, 22.6, 14.1, 14.1; HRMS (ESI)  $m/z$  calcd. for  $\text{C}_{24}\text{H}_{48}\text{NaS}_2^+$  ( $[\text{M}+\text{Na}]^+$ ) 423.3090, found 423.3092

### Decyl(1-(isopentylthio)octyl)sulfane (**3eo**)

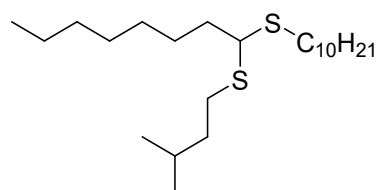

Prepared according to General procedure (A) using decyl(oct-1-en-1-yl)sulfane **1e** and 3-methylbutane-1-thiol **2o** at 50 °C, 1 h, 51% yield; Colorless oil;  $^1\text{H NMR}$  (400 MHz,  $\text{CDCl}_3$ )  $\delta$  3.74 (t,  $J = 7.0$  Hz, 1H), 2.72 – 2.59 (m, 2H), 2.56 (dq,  $J = 12.4, 7.4$  Hz, 2H), 1.78 (q,  $J = 7.9, 7.2$  Hz, 2H), 1.69 (dt,  $J = 13.3, 6.7$  Hz, 1H), 1.60 – 1.51 (m, 3H), 1.50 – 1.44 (m, 3H), 1.42 – 1.24 (m, 22H), 0.91 (d,  $J = 6.6$  Hz, 6H), 0.90 – 0.86 (m, 6H).  $^{13}\text{C NMR}$  (100 MHz,  $\text{CDCl}_3$ )  $\delta$  52.0, 38.4, 36.1, 36.1, 31.9, 31.8, 30.0, 29.5, 29.5, 29.4, 29.3, 29.2, 29.1, 29.0, 28.0, 27.5, 27.5, 22.7, 22.6, 22.3, 22.2, 14.1, 14.1; HRMS (EI)  $m/z$  calcd. for  $\text{C}_{23}\text{H}_{48}\text{S}_2^+$  ( $[\text{M}]^+$ ) 388.3197, found 388.3200

### Decyl(3-phenyl-1-(phenylthio)propyl)sulfane (**3fa**)

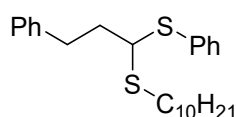

Prepared according to General procedure (A) using decyl(3-phenylprop-1-en-1-yl)sulfane **1f** and benzenethiol **2a** at 50 °C, 2 h, 79% yield; Colorless oil;  $^1\text{H NMR}$  (400 MHz,  $\text{CDCl}_3$ )  $\delta$

7.39 (dd,  $J = 7.5, 1.8$  Hz, 2H), 7.31 – 7.24 (m, 5H), 7.19 (d,  $J = 7.2$  Hz, 1H), 7.14 (d,  $J = 7.1$  Hz, 2H), 4.03 (dd,  $J = 7.6, 5.9$  Hz, 1H), 2.97 – 2.79 (m, 2H), 2.75 (dt,  $J = 12.7, 7.3$  Hz, 1H), 2.65 (dt,  $J = 12.4, 7.6$  Hz, 1H), 2.22 – 1.99 (m, 2H), 1.63 – 1.49 (m, 2H), 1.42 – 1.24 (m, 14H), 0.88 (t,  $J = 6.7$  Hz, 3H);  $^{13}\text{C NMR}$  (100 MHz,  $\text{CDCl}_3$ )  $\delta$  140.9, 134.2, 132.7, 128.8, 128.5, 128.3, 127.5, 126.0, 54.0, 37.3, 33.0, 31.9, 31.3, 29.5, 29.5, 29.3, 29.3, 29.2, 28.9, 22.7, 14.1; HRMS (ESI)  $m/z$  calcd. for  $\text{C}_{25}\text{H}_{36}\text{NaS}_2^+$  ( $[\text{M}+\text{Na}]^+$ ) 423.2151, found 423.2153

### Decyl(1-(isopentylthio)-3-phenylpropyl)sulfane (3fo)

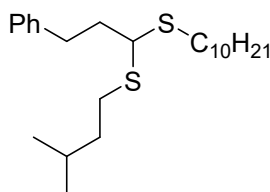

Prepared according to General procedure (A) using decyl(3-phenylprop-1-en-1-yl)sulfane **1f** and 3-methylbutane-1-thiol **2o** at 50 °C, 1 h, 80% yield; Colorless oil;  $^1\text{H NMR}$  (400 MHz,  $\text{CDCl}_3$ )  $\delta$  7.32 – 7.14 (m, 5H), 3.69 (t,  $J = 7.0$  Hz, 1H), 2.85 (t,  $J = 7.6$  Hz, 2H), 2.65 (dtd,  $J = 14.5, 7.6, 2.5$  Hz, 2H), 2.55 (dq,  $J = 12.5, 7.5$  Hz, 2H), 2.09 (q,  $J = 7.4$  Hz, 2H), 1.67 (dt,  $J = 13.3, 6.7$  Hz, 1H), 1.54 (q,  $J = 8.4$  Hz, 2H), 1.44 (q,  $J = 7.4$  Hz, 2H), 1.39 – 1.24 (m, 14H), 0.91 – 0.86 (m, 9H);  $^{13}\text{C NMR}$  (100 MHz,  $\text{CDCl}_3$ )  $\delta$  141.2, 128.5, 128.4, 126.0, 51.0, 38.4, 37.7, 33.5, 31.9, 30.1, 29.6, 29.5, 29.4, 29.3, 29.3, 29.1, 28.1, 27.6, 22.7, 22.4, 22.3, 14.1; HRMS (EI)  $m/z$  calcd. for  $\text{C}_{24}\text{H}_{42}\text{S}_2^+$  ( $[\text{M}]^+$ ) 394.2728, found 394.2730

### Methyl 3-((4-bromophenylthio)-3-(phenylthio)propanoate (3gc)

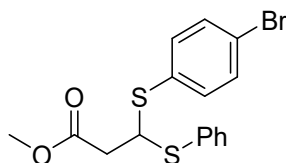

Prepared according to General procedure (A) using methyl 3-(phenylthio)acrylate **1g** and 4-bromobenzenethiol **2c** at 50 °C, 4 h, 81% yield; Colorless oil;  $^1\text{H NMR}$  (400 MHz,  $\text{CDCl}_3$ )  $\delta$  7.46 (dd,  $J = 12.7, 6.8$  Hz, 4H), 7.38 – 7.31 (m, 5H), 4.77 (t,  $J = 7.3$  Hz, 1H), 3.70 (s, 3H), 2.80 (dd,  $J = 7.0, 4.5$  Hz, 2H);  $^{13}\text{C NMR}$  (100 MHz,  $\text{CDCl}_3$ )  $\delta$  170.3, 135.0, 133.5, 132.7, 132.2, 132.1, 129.1, 128.4, 122.8, 53.6, 52.1, 40.9; HRMS (ESI)  $m/z$  calcd. for  $\text{C}_{16}\text{H}_{15}\text{BrNaO}_2\text{S}_2^+$  ( $[\text{M}+\text{Na}]^+$ ) 404.9589, found 404.9587

### Methyl 3-((4-chlorophenyl)thio)-3-(phenylthio)propanoate (3gd)

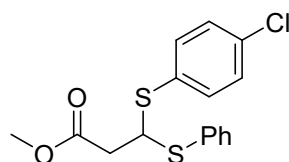

Prepared according to General procedure (A) using methyl 3-(phenylthio)acrylate **1g** and 4-chlorobenzenethiol **2d** at 50 °C, 3 h, 82% yield; Colorless oil;  $^1\text{H NMR}$  (400 MHz,  $\text{CDCl}_3$ )  $\delta$  7.47 (dd,  $J = 6.4, 2.9$  Hz, 2H), 7.41 (d,  $J = 8.4$  Hz, 2H), 7.33 – 7.26 (m, 5H), 4.77 (t,  $J = 7.4$  Hz, 1H), 3.69 (s, 3H), 2.80 (dd,  $J = 7.4, 4.4$  Hz, 2H);  $^{13}\text{C NMR}$  (100 MHz,  $\text{CDCl}_3$ )  $\delta$  170.3, 134.9, 134.6, 133.5, 132.8, 131.3, 129.2, 129.1, 128.4, 53.7, 52.1, 40.9; HRMS (ESI)  $m/z$  calcd. for  $\text{C}_{16}\text{H}_{15}\text{ClNaO}_2\text{S}_2^+$  ( $[\text{M}+\text{Na}]^+$ ) 361.0094, found 361.0097

### Methyl 3-((4-methoxyphenyl)thio)-3-(phenylthio)propanoate (3gf)

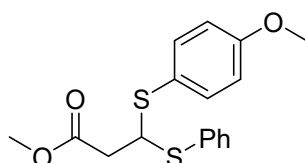

Prepared according to General procedure (A) using methyl 3-(phenylthio)acrylate **1g** and 4-methoxybenzenethiol **2f** at 50 °C, 5 h, 47% yield; Colorless oil;  $^1\text{H NMR}$  (400 MHz,  $\text{CDCl}_3$ )  $\delta$  7.47 (dd,  $J = 12.4, 7.8$  Hz, 4H), 7.37 – 7.27 (m, 3H), 6.87 (d,  $J = 8.0$  Hz, 2H), 4.67 (t,  $J = 7.4$  Hz, 1H), 3.82 (s, 3H), 3.70 (s, 3H), 2.77 (d,  $J = 7.4$  Hz, 2H);  $^{13}\text{C NMR}$  (100 MHz,  $\text{CDCl}_3$ )  $\delta$  170.5, 160.3, 136.8, 133.4, 133.0, 129.0, 128.0, 122.7, 114.5, 55.3, 54.2, 52.0, 40.9; HRMS (ESI)  $m/z$  calcd. for  $\text{C}_{17}\text{H}_{18}\text{NaO}_3\text{S}_2^+$  ( $[\text{M}+\text{Na}]^+$ ) 357.0590, found 357.0587

### Methyl 3-(phenylthio)-3-(p-tolylthio)propanoate (3gg)

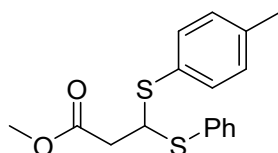

Prepared according to General procedure (A) using methyl 3-(phenylthio)acrylate **1g** and 4-methylbenzenethiol **2g** at 50 °C, 5 h, 95% yield; Colorless oil;  $^1\text{H NMR}$  (400 MHz,  $\text{CDCl}_3$ )  $\delta$  7.49 (d,  $J = 5.5$  Hz, 1H), 7.39 (d,  $J = 7.7$  Hz, 3H), 7.32 (d,  $J = 5.6$  Hz, 2H), 7.14 (d,  $J = 7.5$  Hz, 3H), 4.71 (dt,  $J = 24.7, 7.3$  Hz, 1H), 3.69 (s, 3H), 2.78 (dd,  $J = 10.7, 7.7$  Hz, 2H), 2.35 (s, 3H);

$^{13}\text{C}$  NMR (100 MHz,  $\text{CDCl}_3$ )  $\delta$  170.5, 138.5, 134.2, 134.0, 133.4, 133.3, 129.8, 129.0, 128.1, 53.7, 51.9, 41.0, 21.2; HRMS (ESI)  $m/z$  calcd. for  $\text{C}_{17}\text{H}_{18}\text{NaO}_2\text{S}_2^+$  ( $[\text{M}+\text{Na}]^+$ ) 341.0640, found 341.0639

### Methyl 3-(phenylthio)-3-((4-(trifluoromethyl)phenyl)thio)propanoate (3gh)

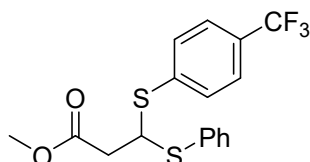

Prepared according to General procedure (A) using methyl 3-(phenylthio)acrylate **1g** and 4-(trifluoromethyl)benzenethiol **2h** at 50 °C, 5 h, 77% yield; Colorless oil;  $^1\text{H}$  NMR (400 MHz,  $\text{CDCl}_3$ )  $\delta$  7.54 (s, 4H), 7.50 – 7.46 (m, 2H), 7.34 – 7.31 (m, 3H), 4.90 (t,  $J = 7.4$  Hz, 1H), 3.71 (s, 3H), 2.85 (t,  $J = 7.4$  Hz, 2H);  $^{13}\text{C}$  NMR (100 MHz,  $\text{CDCl}_3$ )  $\delta$  170.2, 138.6, 133.8, 132.2, 131.7, 129.56 (q,  $J = 32.6$  Hz), 129.1, 128.7, 125.77 (q,  $J = 3.7$  Hz), 123.88 (q,  $J = 272.2$  Hz), 52.8, 52.1, 40.8; HRMS (ESI)  $m/z$  calcd. for  $\text{C}_{17}\text{H}_{15}\text{F}_3\text{NaO}_2\text{S}_2^+$  ( $[\text{M}+\text{Na}]^+$ ) 395.0358, found 395.0358

### Methyl 3-(naphthalen-2-ylthio)-3-(phenylthio)propanoate (3gi)

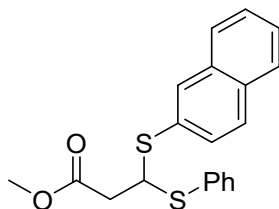

Prepared according to General procedure (A) using methyl 3-(phenylthio)acrylate **1g** and naphthalene-2-thiol **2i** at 50 °C, 5 h, 95% yield; Colorless oil;  $^1\text{H}$  NMR (400 MHz,  $\text{CDCl}_3$ )  $\delta$  7.96 (s, 1H), 7.78 (dq,  $J = 14.5, 6.9, 5.4$  Hz, 4H), 7.58 – 7.47 (m, 6H), 7.32 (d,  $J = 4.7$  Hz, 1H), 4.96 (dt,  $J = 43.3, 7.4$  Hz, 1H), 3.69 (s, 3H), 2.88 (dd,  $J = 18.0, 7.3$  Hz, 2H);  $^{13}\text{C}$  NMR (100 MHz,  $\text{CDCl}_3$ )  $\delta$  170.5, 133.6, 133.4, 132.8, 132.6, 130.3, 130.2, 129.0, 128.6, 128.3, 127.7, 126.6, 126.6, 53.4, 52.0, 41.1; HRMS (ESI)  $m/z$  calcd. for  $\text{C}_{20}\text{H}_{18}\text{NaO}_2\text{S}_2^+$  ( $[\text{M}+\text{Na}]^+$ ) 377.0640, found 377.0638

### Methyl 3-(phenylthio)-3-(thiophen-2-ylthio)propanoate (3gj)



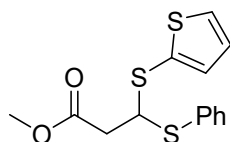

Prepared according to General procedure (A) using methyl 3-(phenylthio)acrylate **1g** and thiophene-2-thiol **2j** at reflux, 8 h, 36% yield; Colorless oil; There were inseparable mixture, the yield was obtained by NMR yield; **<sup>1</sup>H NMR** (400 MHz, CDCl<sub>3</sub>) δ 7.51 – 7.43 (m, 3H), 7.38 – 7.30 (m, 3H), 7.20 (d, J = 3.4 Hz, 1H), 7.04 (t, J = 4.6 Hz, 1H), 4.63 (t, J = 7.1 Hz, 1H), 3.71 (s, 3H), 2.82 (q, J = 8.7, 8.1 Hz, 2H); **<sup>13</sup>C NMR** (100 MHz, CDCl<sub>3</sub>) δ 170.3, 136.8, 133.4, 133.3, 131.5, 129.1, 129.0, 128.3, 127.7, 55.3, 52.1, 40.6; HRMS (ESI) m/z calcd. for C<sub>14</sub>H<sub>14</sub>NaO<sub>2</sub>S<sub>3</sub><sup>+</sup> ([M+Na]<sup>+</sup>) 333.0048, found 333.0047

### Methyl 3-(hexylthio)-3-(phenylthio)propanoate (**3gl**)

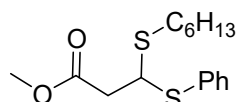

Prepared according to General procedure (A) using methyl 3-(phenylthio)acrylate **1g** and hexane-1-thiol **2l** at 50 °C, 6 h, 39% yield; Colorless oil; **<sup>1</sup>H NMR** (400 MHz, CDCl<sub>3</sub>) δ 7.55 – 7.46 (m, 2H), 7.39 – 7.28 (m, 3H), 4.50 (dd, J = 8.1, 6.8 Hz, 1H), 3.69 (s, 3H), 2.89 – 2.76 (m, 2H), 2.80 – 2.65 (m, 2H), 1.61 (dd, J = 10.6, 3.4 Hz, 2H), 1.42 – 1.26 (m, 6H), 0.89 (t, J = 6.8 Hz, 3H); **<sup>13</sup>C NMR** (100 MHz, CDCl<sub>3</sub>) δ 170.6, 133.7, 133.0, 128.9, 128.2, 52.0, 50.3, 41.4, 31.7, 31.3, 29.1, 28.5, 22.5, 14.0; HRMS (ESI) m/z calcd. for C<sub>16</sub>H<sub>24</sub>NaO<sub>2</sub>S<sub>2</sub><sup>+</sup> ([M+Na]<sup>+</sup>) 335.1110, found 335.1114

### Methyl 3-(isopentylthio)-3-(phenylthio)propanoate (**3go**)

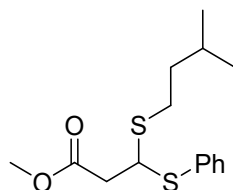

Prepared according to General procedure (A) using methyl 3-(phenylthio)acrylate **1g** and 3-methylbutane-1-thiol **2o** at 50 °C, 6 h, 52% yield; Colorless oil; **<sup>1</sup>H NMR** (400 MHz, CDCl<sub>3</sub>) δ 7.51 – 7.48 (m, 2H), 7.36 – 7.30 (m, 3H), 4.51 (dd, J = 8.2, 6.7 Hz, 1H), 3.69 (s, 3H), 2.88 – 2.66 (m, 4H), 1.66 (dt, J = 13.3, 6.7 Hz, 1H), 1.49 (q, J = 7.5 Hz, 2H), 0.91 (dd, J = 6.6, 3.5

Hz, 6H)  $^{13}\text{C}$  NMR (100 MHz,  $\text{CDCl}_3$ )  $\delta$  170.5, 133.7, 133.0, 129.0, 128.2, 52.0, 50.3, 41.4, 38.0, 29.7, 27.4, 22.3, 22.2; HRMS (ESI)  $m/z$  calcd. for  $\text{C}_{15}\text{H}_{22}\text{NaO}_2\text{S}_2^+$  ( $[\text{M}+\text{Na}]^+$ ) 321.0953, found 321.0958

## 4. Synthesis of vinyl sulfides

### 4.1. General procedure of 1a, 1b, 1c, 1d, 1g

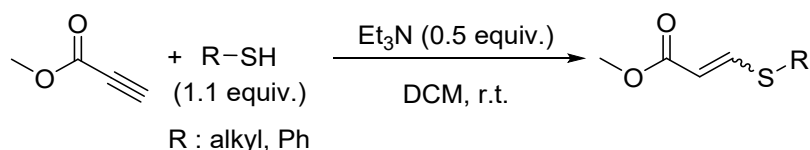

*General procedure (B)* : In a dry, clean round bottom flask, add corresponding thiol (1.1 equiv.) to the solution of methyl propiolate (1 equiv.) in DCM, followed by the addition of triethylamine (0.5 equiv.). Stir the reaction contents at room temperature until the reaction completion. After the reaction completion, most of the solvent had been removed under reduced pressure; the residue was used for the purification via column chromatography. The synthesized mixture of E and Z vinyl sulfides.

### Methyl 3-(decylthio)acrylate (1a)

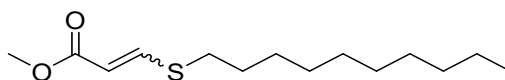

Prepared according to General procedure (B) using methyl propiolate (1 equiv.) and decane-1-thiol (1.1 equiv.), E:Z = 10:1; Colorless oil; The NMR spectrum was obtained as a mixture of E/Z isomers;  $^1\text{H}$  NMR (400 MHz,  $\text{CDCl}_3$ )  $\delta$  7.70 (d,  $J = 15.1$  Hz, 1H), 7.10 (d,  $J = 10.1$  Hz, 0.1H), 5.85 (d,  $J = 10.3$  Hz, 1H), 5.75 (d,  $J = 15.1$  Hz, 0.1H), 3.74 (s, 0.3H), 3.73 (s, 3H), 2.79 (t,  $J = 7.4$  Hz, 2H), 1.74 – 1.59 (m, 3H), 1.51 – 1.22 (m, 14H), 0.88 (t,  $J = 6.6$  Hz, 3H); The compound was identified by spectral comparison with literature data.<sup>1</sup>

### Methyl 3-(cyclohexylthio)acrylate (1b)

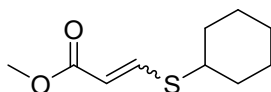

Prepared according to General procedure (B) using methyl propiolate (1 equiv.) and cyclohexanethiol (1.1 equiv.), E:Z = 10:1; Colorless oil; The NMR spectrum was obtained as a mixture of E/Z isomers;  $^1\text{H NMR}$  (400 MHz,  $\text{CDCl}_3$ )  $\delta$  7.70 (d,  $J = 15.3$  Hz, 1H), 7.17 (d,  $J = 10.2$  Hz, 0.1H), 5.80 (d,  $J = 15.3$  Hz, 1.1H), 3.72 (s, 0.3H), 3.70 (s, 3H), 3.05 (ddd,  $J = 14.2, 8.7, 4.0$  Hz, 1.1H), 2.07 – 1.96 (m, 2H), 1.83 – 1.72 (m, 2H), 1.67 – 1.58 (m, 1H), 1.51 – 1.20 (m, 5H); The compound was identified by spectral comparison with literature data.<sup>2</sup>

### Methyl 3-(tert-butylthio)acrylate (1c)

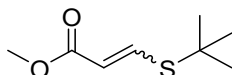

Prepared according to General procedure (B) using methyl propiolate (1 equiv.) and 2-methylpropane-2-thiol (1.1 equiv.), E:Z = 3:1; Colorless oil; The NMR spectrum was obtained as a mixture of E/Z isomers;  $^1\text{H NMR}$  (400 MHz,  $\text{CDCl}_3$ )  $\delta$  7.85 (d,  $J = 15.5$  Hz, 1H), 7.29 (d,  $J = 11.0$  Hz, 0.3H), 5.93 (d,  $J = 15.5$  Hz, 1H), 5.89 (d,  $J = 10.5$  Hz, 0.3H), 3.74 (s, 1H), 3.73 (s, 3H), 1.43 (s, 9H), 1.41 (s, 3H). The compound was identified by spectral comparison with literature data.<sup>3</sup>

### Methyl 3-(benzylthio)acrylate (1d)

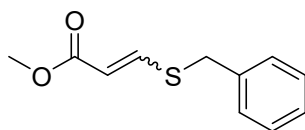

Prepared according to General procedure (B) using methyl propiolate (1 equiv.) and phenylmethanethiol (1.1 equiv.), E:Z = 5:1; White solid; The NMR spectrum was obtained as a mixture of E/Z isomers;  $^1\text{H NMR}$  (400 MHz,  $\text{CDCl}_3$ )  $\delta$  7.70 (d,  $J = 15.2$  Hz, 1H), 7.36 – 7.27 (m, 6H), 7.06 (d,  $J = 10.2$  Hz, 0.2H), 5.81 (d,  $J = 15.2$  Hz, 1.2H), 4.02 (s, 2H), 3.96 (s, 0.4H), 3.72 (s, 0.6H), 3.71 (s, 3H); The compound was identified by spectral comparison with literature data.<sup>4</sup>

## Methyl 3-(phenylthio)acrylate (1g)

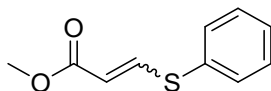

Prepared according to General procedure (B) using methyl propiolate (1 equiv.) and benzenethiol (1.1 equiv.), E:Z = 3:1; Colorless oil; The NMR spectrum was obtained as a mixture of E/Z isomers;  $^1\text{H NMR}$  (400 MHz,  $\text{CDCl}_3$ )  $\delta$  7.79 (d,  $J = 15.1$  Hz, 1H), 7.51 – 7.45 (m, 3H), 7.43 – 7.34 (m, 3.6H), 7.29 (d,  $J = 10.1$  Hz, 0.3H), 5.93 (d,  $J = 10.1$  Hz, 0.3H), 5.66 (d,  $J = 15.1$  Hz, 1H), 3.79 (s, 1H), 3.70 (s, 3H); The compound was identified by spectral comparison with literature data.<sup>5</sup>

## 4.2. General procedure and characterization of 1e and 1f

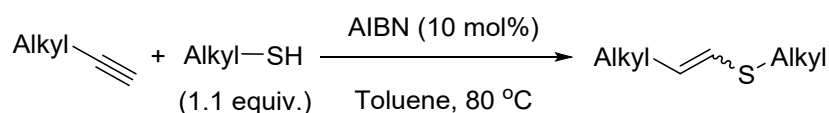

*General procedure (C)* : In a dry, clean reaction tube, AIBN (10 mol%) was taken and degassed with  $\text{N}_2$  three times, then added the solution of alkyne in toluene followed by the addition of corresponding thiol (1.1 equiv.). The reaction contents are heated to  $80^\circ\text{C}$  until the reaction completion. After the reaction completion, the reaction was diluted with DCM and washed with water followed by brine solution. The organic layer was dried over anhydrous  $\text{Na}_2\text{SO}_4$ . The solvent had been removed under reduced pressure. The crude product was purified via column chromatography.

## Decyl(oct-1-en-1-yl)sulfane (1e)

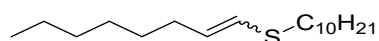

Prepared according to General procedure (C) using oct-1-yne (1 equiv.) and decane-1-thiol (1.1 equiv.), 85% yield, E:Z = 3:1; Colorless oil; The NMR spectrum was obtained as a mixture of E/Z isomers;  $^1\text{H NMR}$  (400 MHz,  $\text{CDCl}_3$ )  $\delta$  5.91 (d,  $J = 5.6$  Hz, 0.3H), 5.89 (d,  $J = 9.4$  Hz, 1H), 5.66 – 5.51 (m, 1.3H), 2.63 (q,  $J = 7.3$  Hz, 2.6H), 2.09 (dq,  $J = 14.4, 6.9$  Hz, 2.6H), 1.65 – 1.58 (m, 2.6H), 1.42 – 1.23 (m, 29H), 0.88 (t,  $J = 6.3$  Hz, 8H);  $^{13}\text{C NMR}$  (100 MHz,  $\text{CDCl}_3$ )

$\delta$  130.8, 129.5, 124.9, 122.6, 33.9, 33.2, 32.7, 31.9, 31.7, 31.7, 30.3, 29.5, 29.5, 29.5, 29.3, 29.2, 29.1, 29.1, 29.0, 28.9, 28.8, 28.7, 28.6, 28.5, 28.4, 22.7, 22.6, 22.6, 14.1, 14.1; **HRMS (DART)**  $m/z$  calcd. for  $C_{18}H_{37}S^+$  ( $[M+H]^+$ ) 285.2610, found 285.2610

### Decyl(3-phenylprop-1-en-1-yl)sulfane (1f)

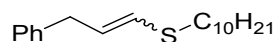

Prepared according to General procedure (C) using prop-2-yn-1-ylbenzene (1 equiv.) and decane-1-thiol (1.1 equiv.), 73% yield, E:Z = 1:2.2; Colorless oil; The NMR spectrum was obtained as a mixture of E/Z isomers;  **$^1\text{H}$  NMR** (400 MHz,  $\text{CDCl}_3$ )  $\delta$  7.33 – 7.14 (m, 7.26H), 6.05 (d,  $J = 9.3$  Hz, 1H), 6.01 (d,  $J = 15.1$  Hz, 0.45H), 5.73 (q,  $J = 7.3$  Hz, 1.45H), 3.48 (d,  $J = 7.1$  Hz, 2H), 3.42 (d,  $J = 6.9$  Hz, 0.9H), 2.70 (t,  $J = 7.3$  Hz, 2H), 2.65 (t,  $J = 7.4$  Hz, 0.9H), 1.64 (dq,  $J = 13.6, 6.8$  Hz, 2.9H), 1.47 – 1.21 (m, 20.6H), 0.88 (t,  $J = 6.4$  Hz, 4.36H);  **$^{13}\text{C}$  NMR** (100 MHz,  $\text{CDCl}_3$ )  $\delta$  140.4, 140.0, 128.5, 128.4, 128.4, 127.7, 127.7, 126.3, 126.1, 126.0, 125.4, 124.8, 39.8, 39.4, 35.4, 34.0, 32.5, 31.9, 31.9, 30.3, 29.5, 29.5, 29.5, 29.5, 29.4, 29.3, 29.2, 29.2, 28.8, 28.6, 22.7, 22.4, 14.2, 14.1; **HRMS (DART)**  $m/z$  calcd. for  $C_{19}H_{31}S^+$  ( $[M+H]^+$ ) 291.2141, found 291.2147

## 5. References

1. T. Craig, D. James, P. Gary, K. Francis, P. Nicole, EP1007509, 2004, B1
2. S. P. Singh, J. S. O'Donnell and A. L. Schwan, *Org. Biomol. Chem.*, 2010, **8**, 1712-1717.
3. Y. Li, C. Mück-Lichtenfeld and A. Studer, *Angew. Chem. Int. Ed.*, 2016, **55**, 14435-14438.
4. J. S. O'Donnell, S. P. Singh, T. A. Metcalf and A. L. Schwan, *Eur. J. Org. Chem.*, 2009, **2009**, 547-553.
5. D. C. Ladie Kimberly, D. C. Ladie Kimberly, J. Xingyue, P. Zhixiang, W. Binghe, WO2019/32879, 2019, A1

## 6. NMR spectra

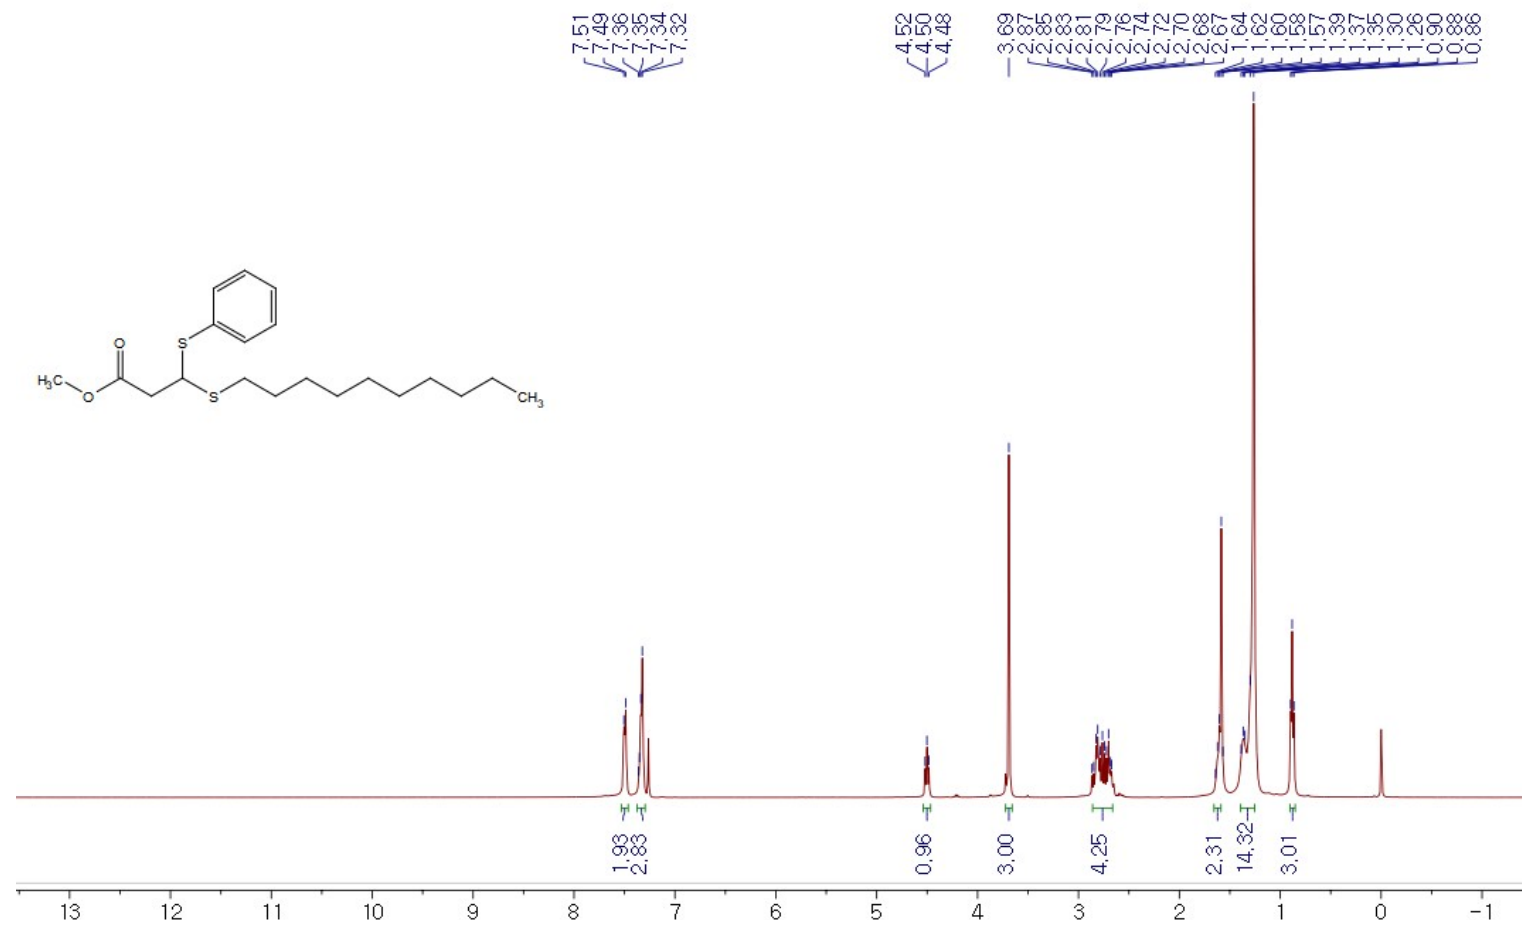

<sup>1</sup>H NMR (400 MHz, CDCl<sub>3</sub>) spectra of Methyl 3-(decylthio)-3-(phenylthio)propanoate (**3aa**)

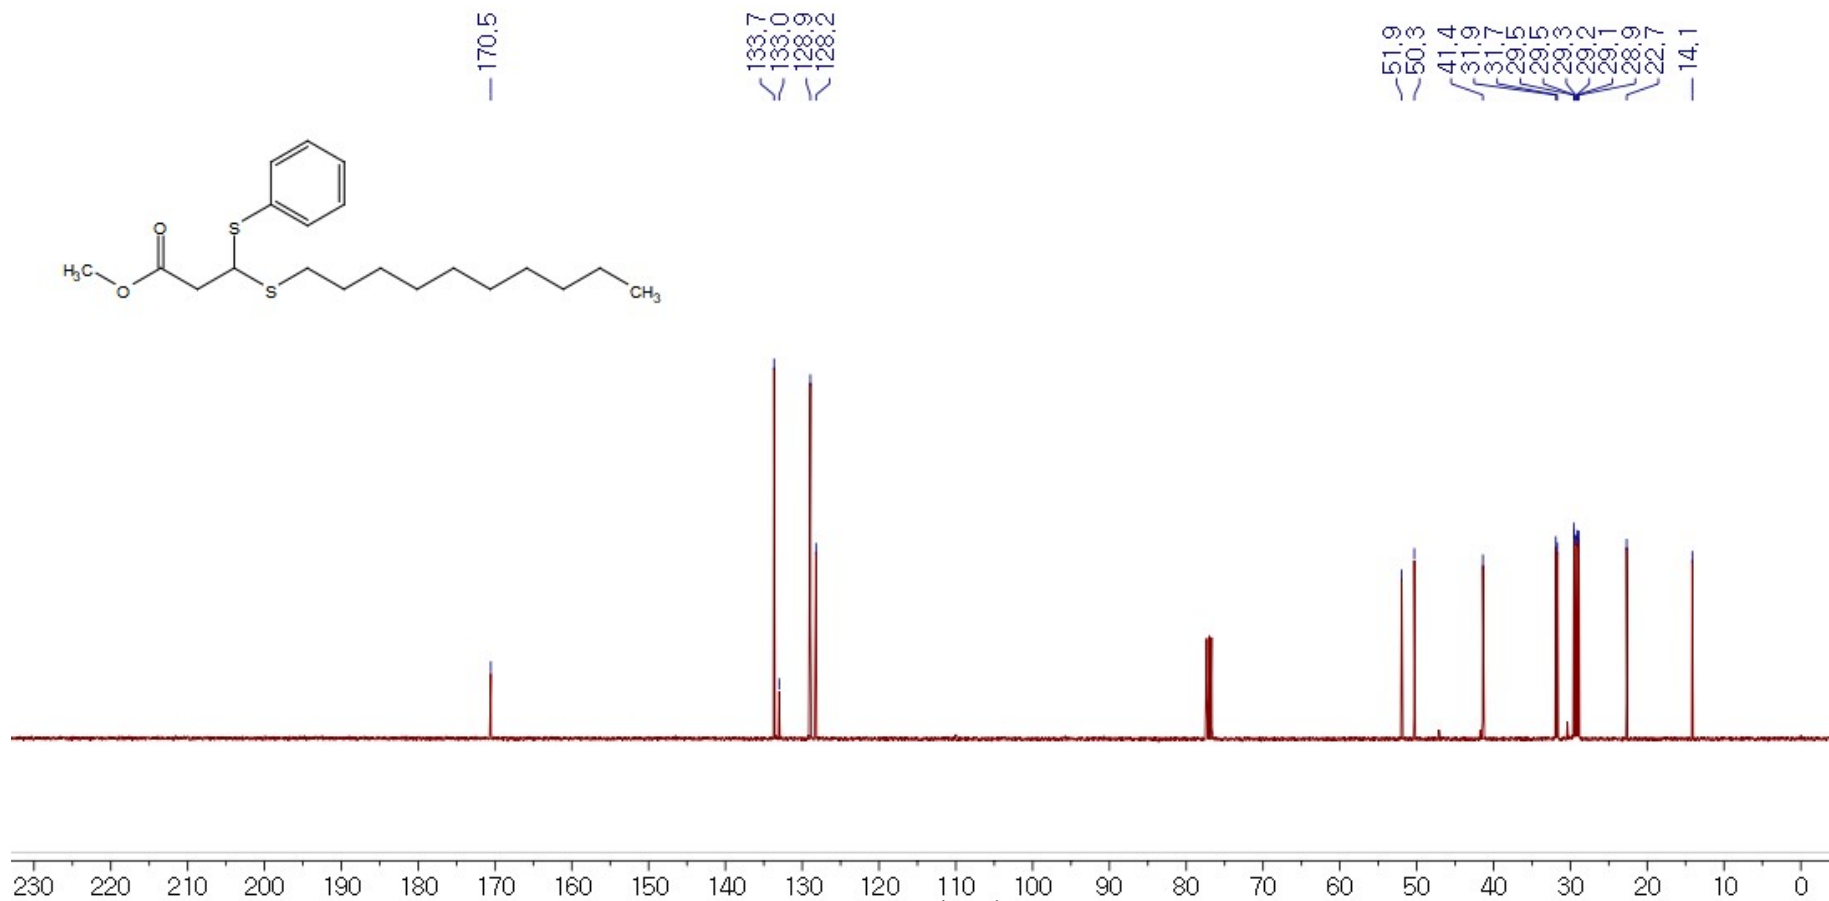

$^{13}\text{C}$  NMR (100 MHz,  $\text{CDCl}_3$ ) spectra of Methyl 3-(decylthio)-3-(phenylthio)propanoate (**3aa**)



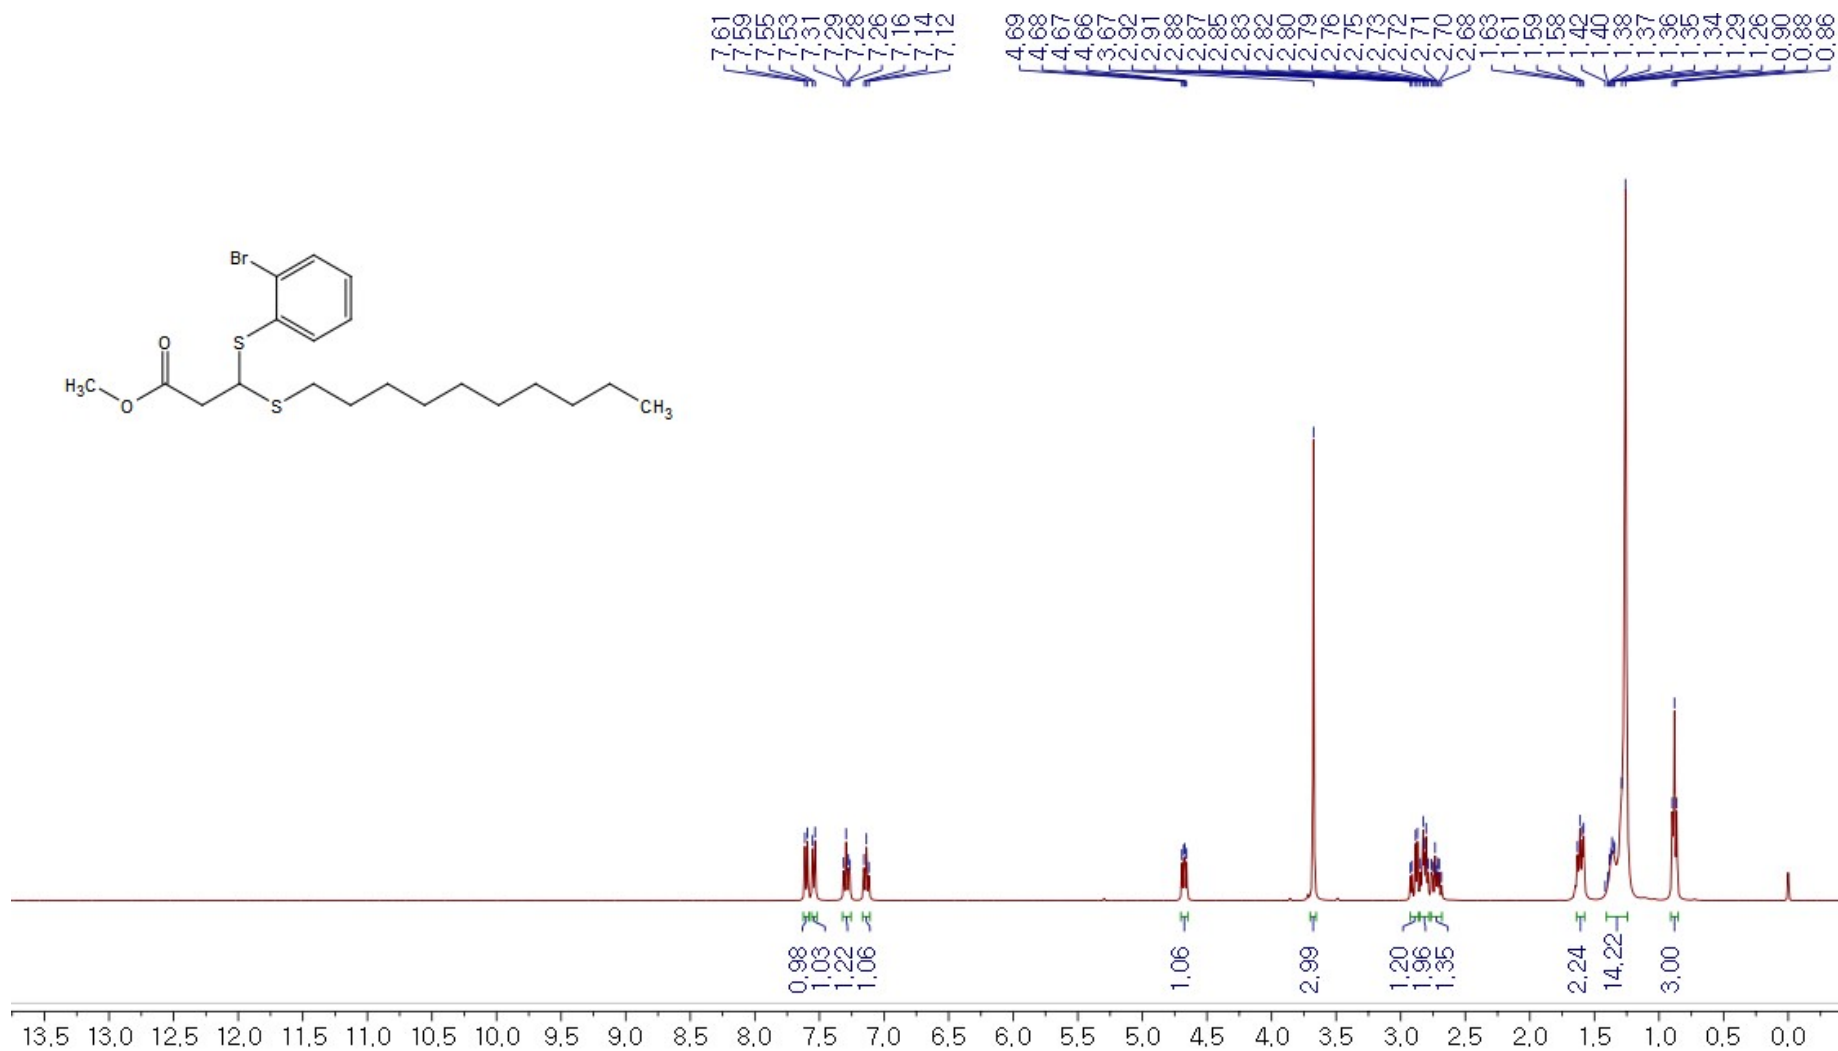

<sup>1</sup>H NMR (400 MHz, CDCl<sub>3</sub>) spectra of Methyl 3-((2-bromophenyl)thio)-3-(decylthio)propanoate (**3ab**)

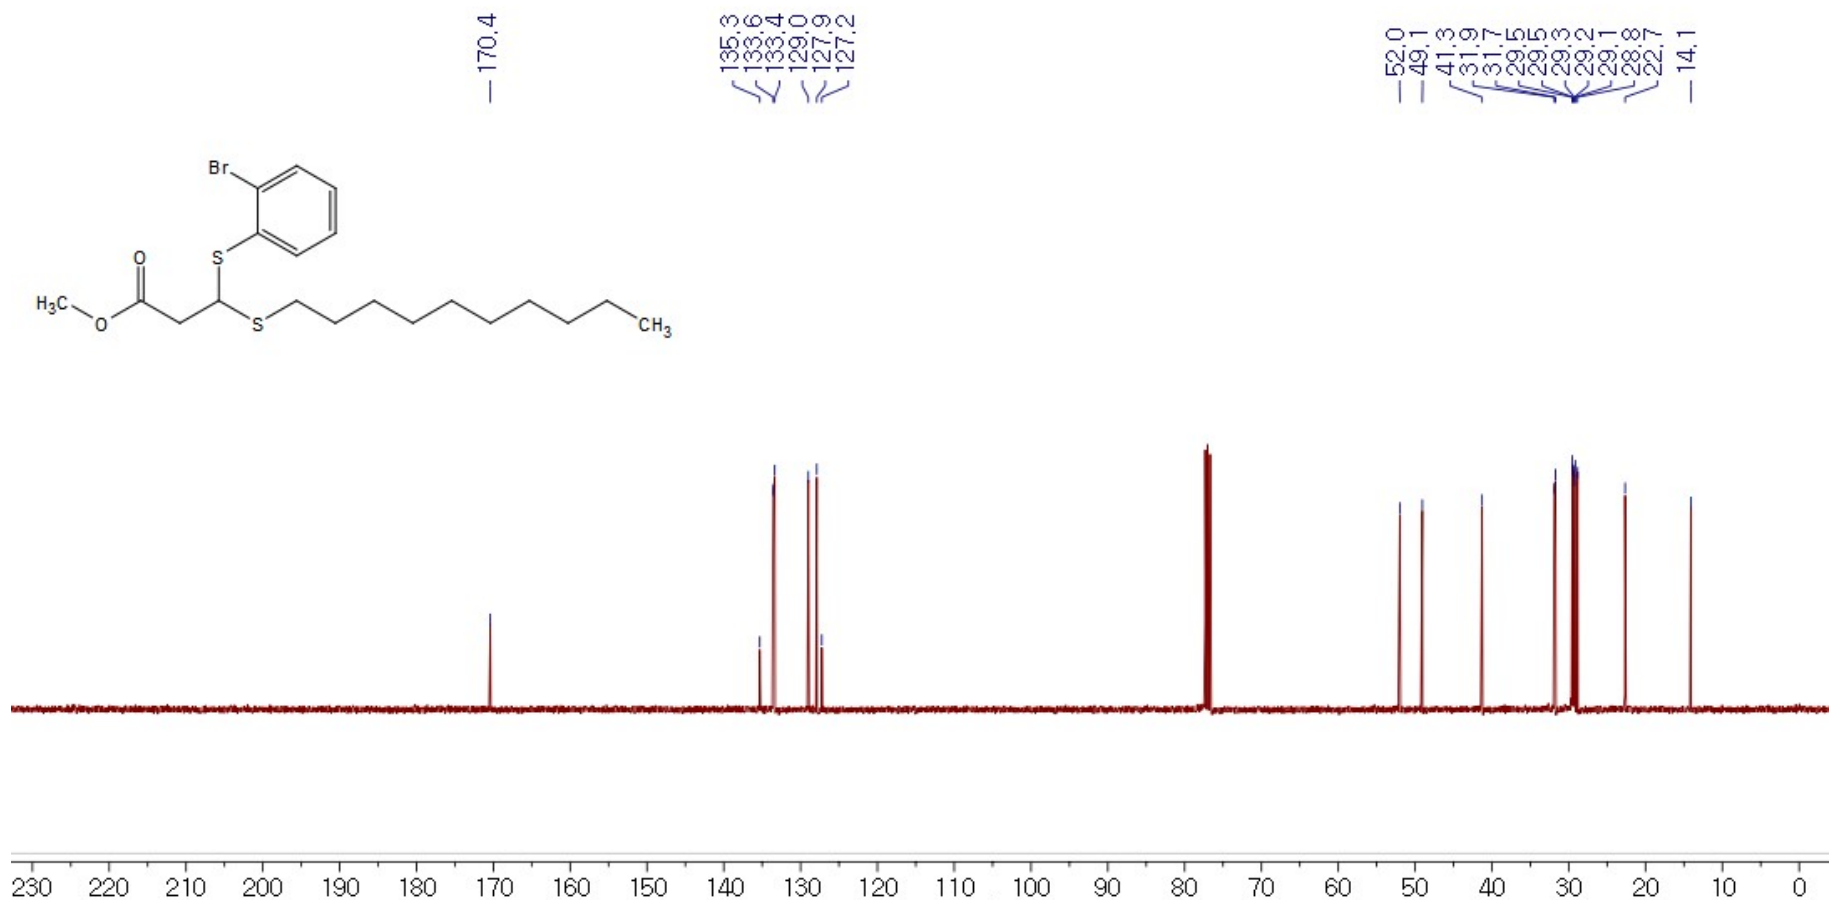

$^{13}\text{C}$  NMR (100 MHz,  $\text{CDCl}_3$ ) spectra of Methyl 3-((2-bromophenyl)thio)-3-(decylthio)propanoate (**3ab**)

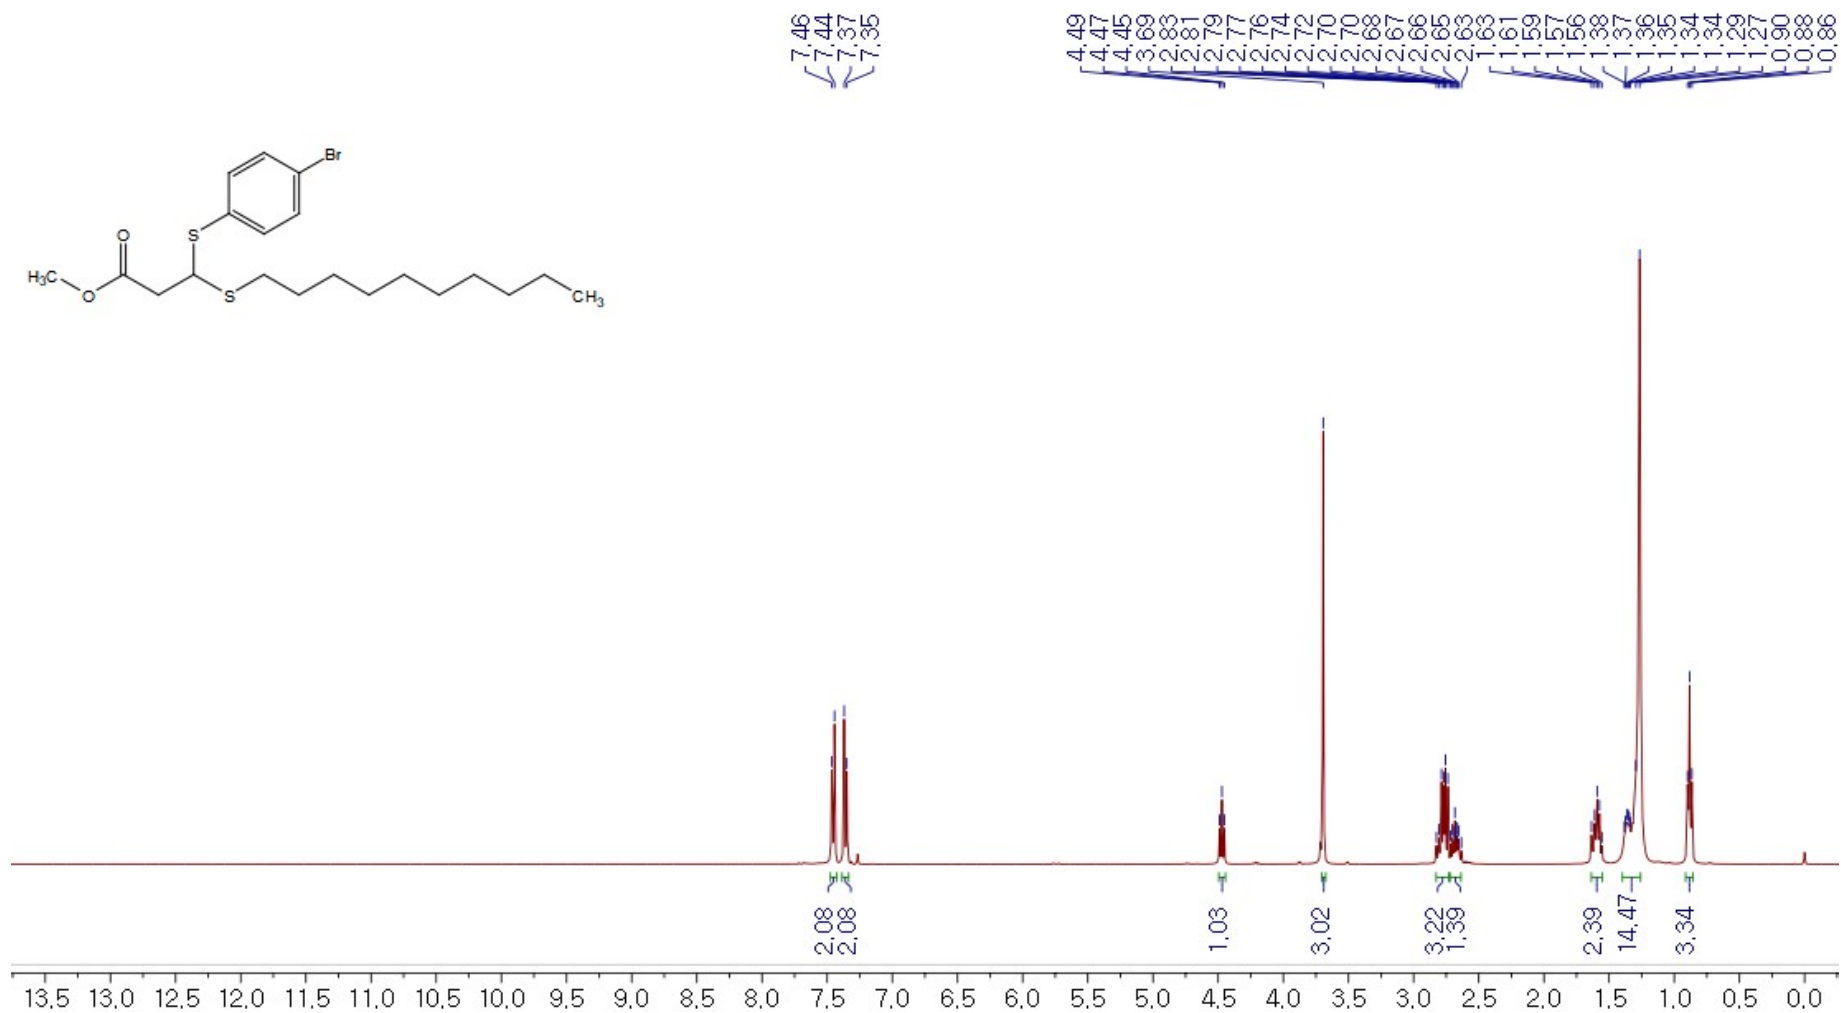

<sup>1</sup>H NMR (400 MHz, CDCl<sub>3</sub>) spectra of Methyl 3-((4-bromophenyl)thio)-3-(decylthio)propanoate (**3ac**)

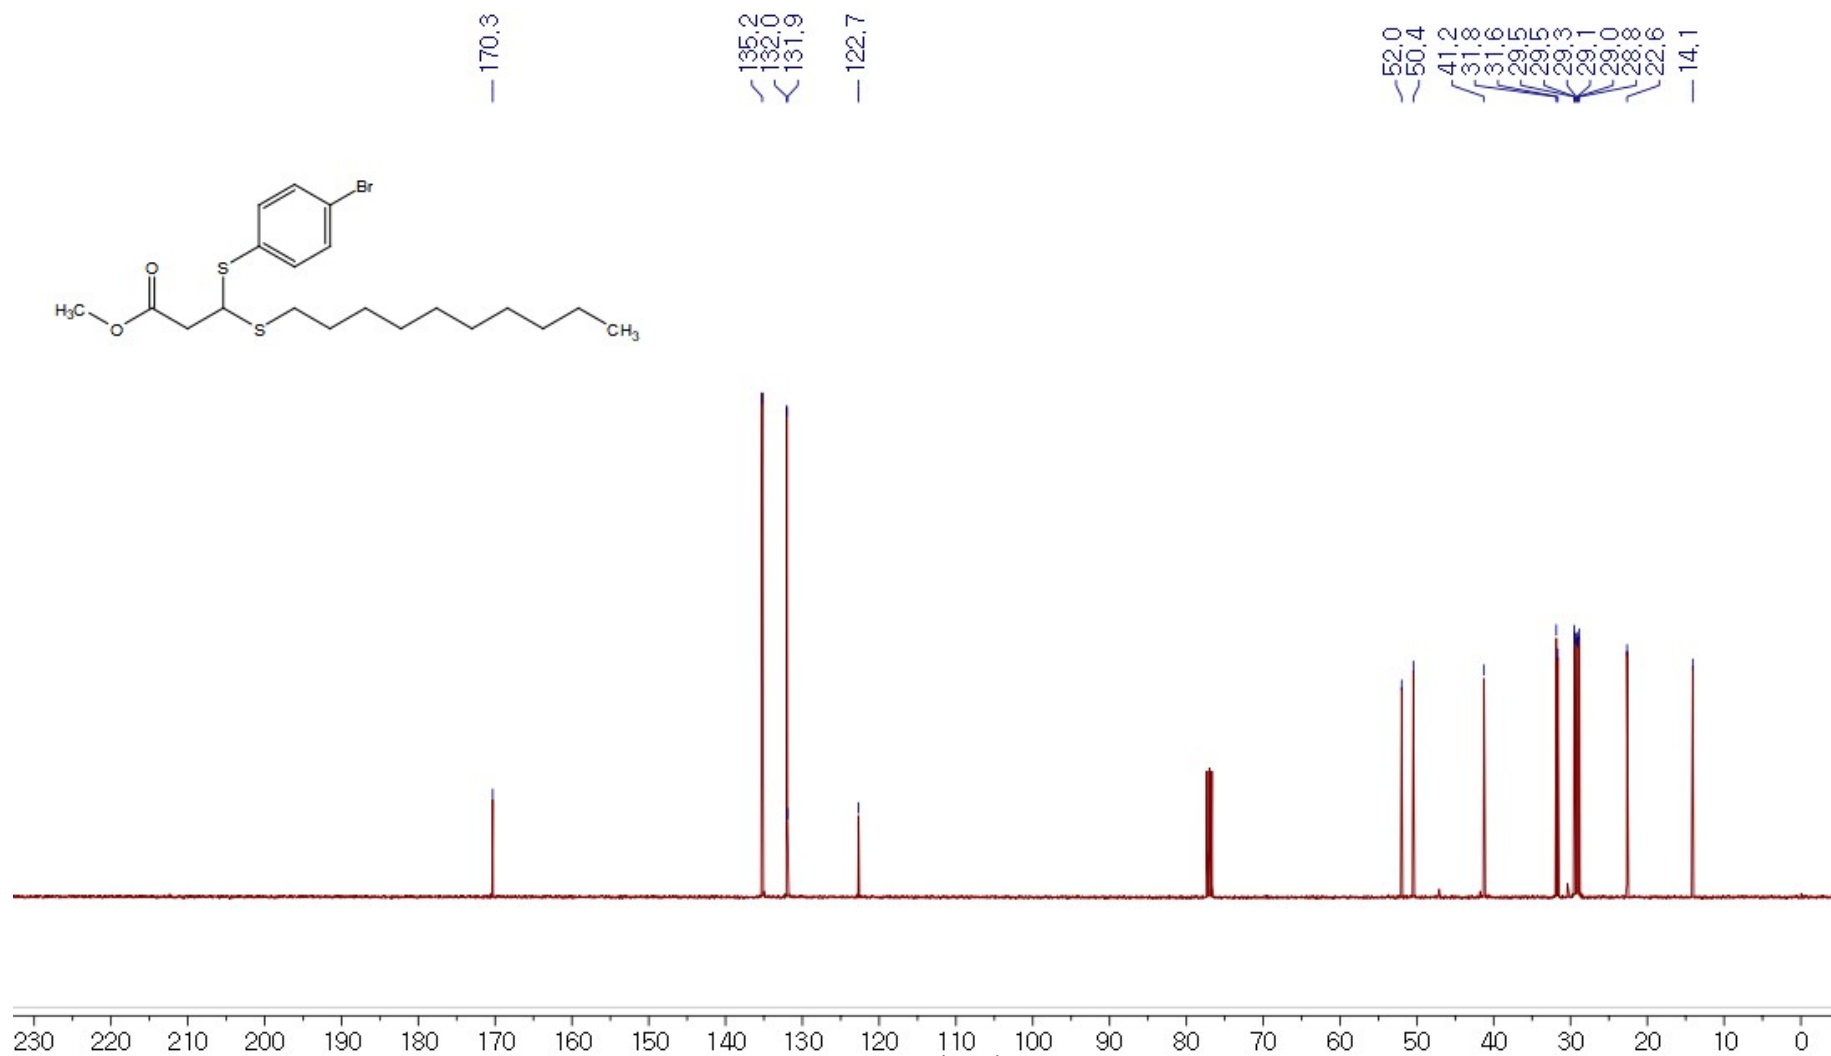

<sup>13</sup>C NMR (100 MHz, CDCl<sub>3</sub>) spectra of Methyl 3-((4-bromophenyl)thio)-3-(decylthio)propanoate (**3ac**)

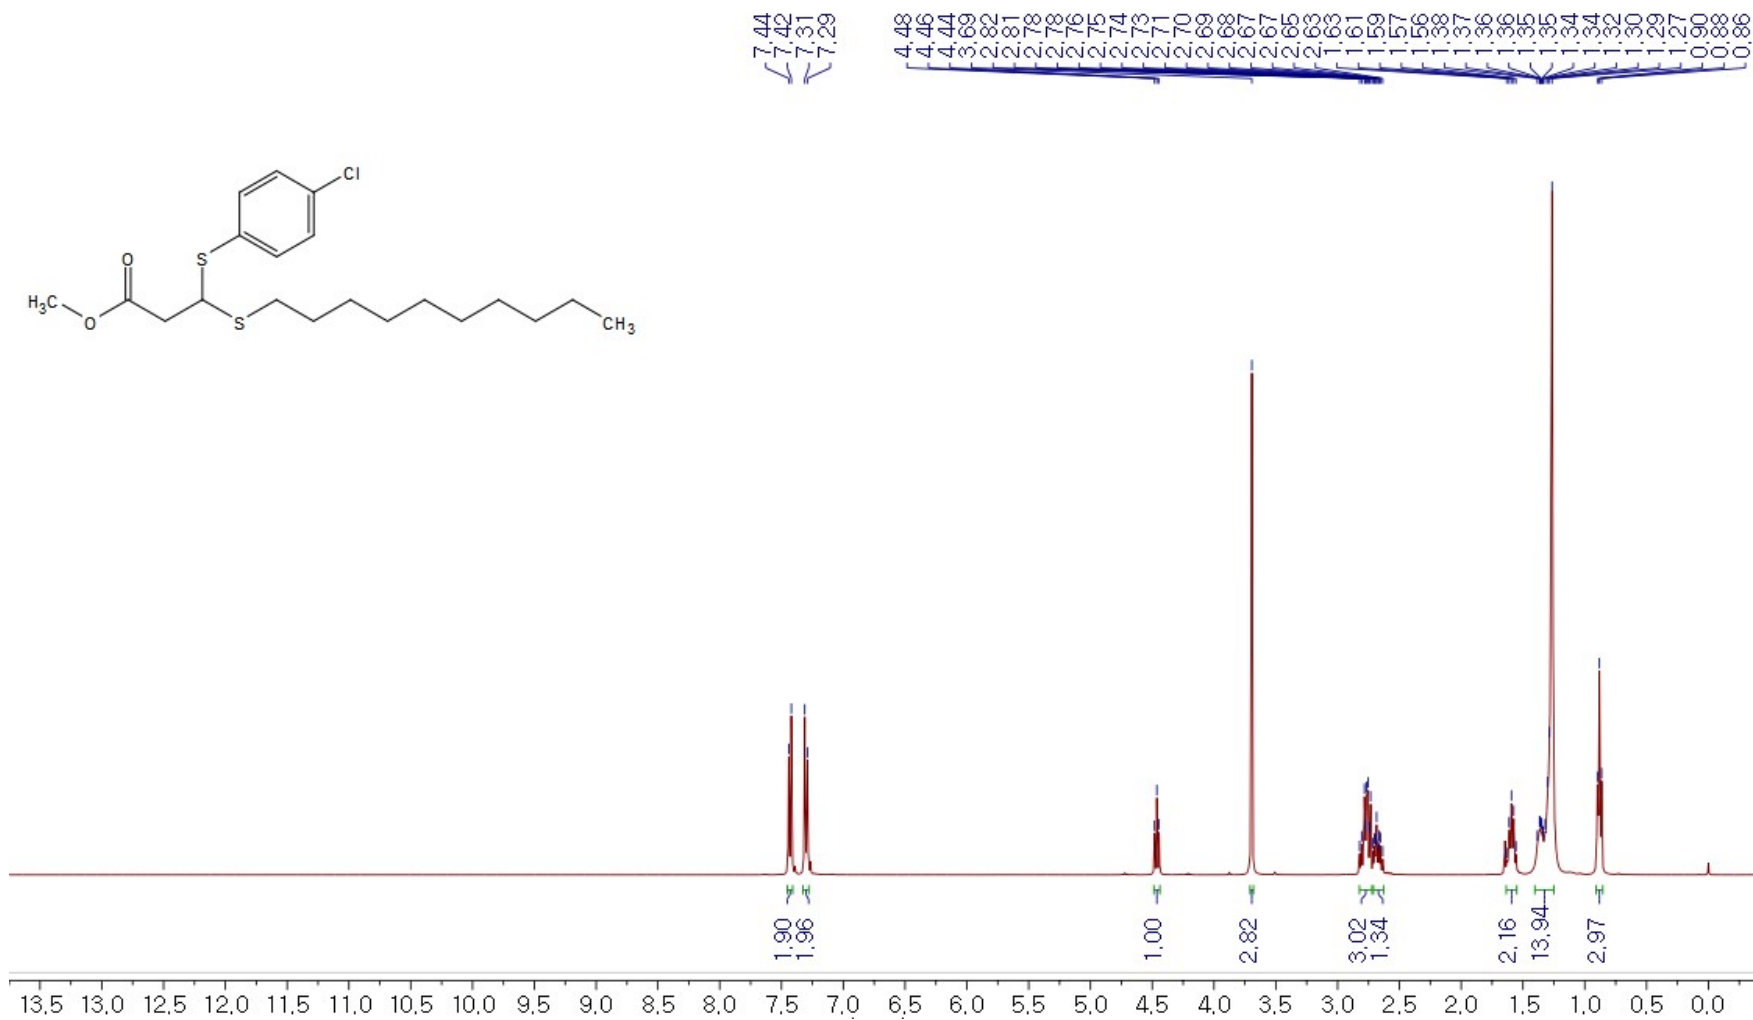

<sup>1</sup>H NMR (400 MHz, CDCl<sub>3</sub>) spectra of Methyl 3-((4-chlorophenyl)thio)-3-(decylthio)propanoate (3ad)

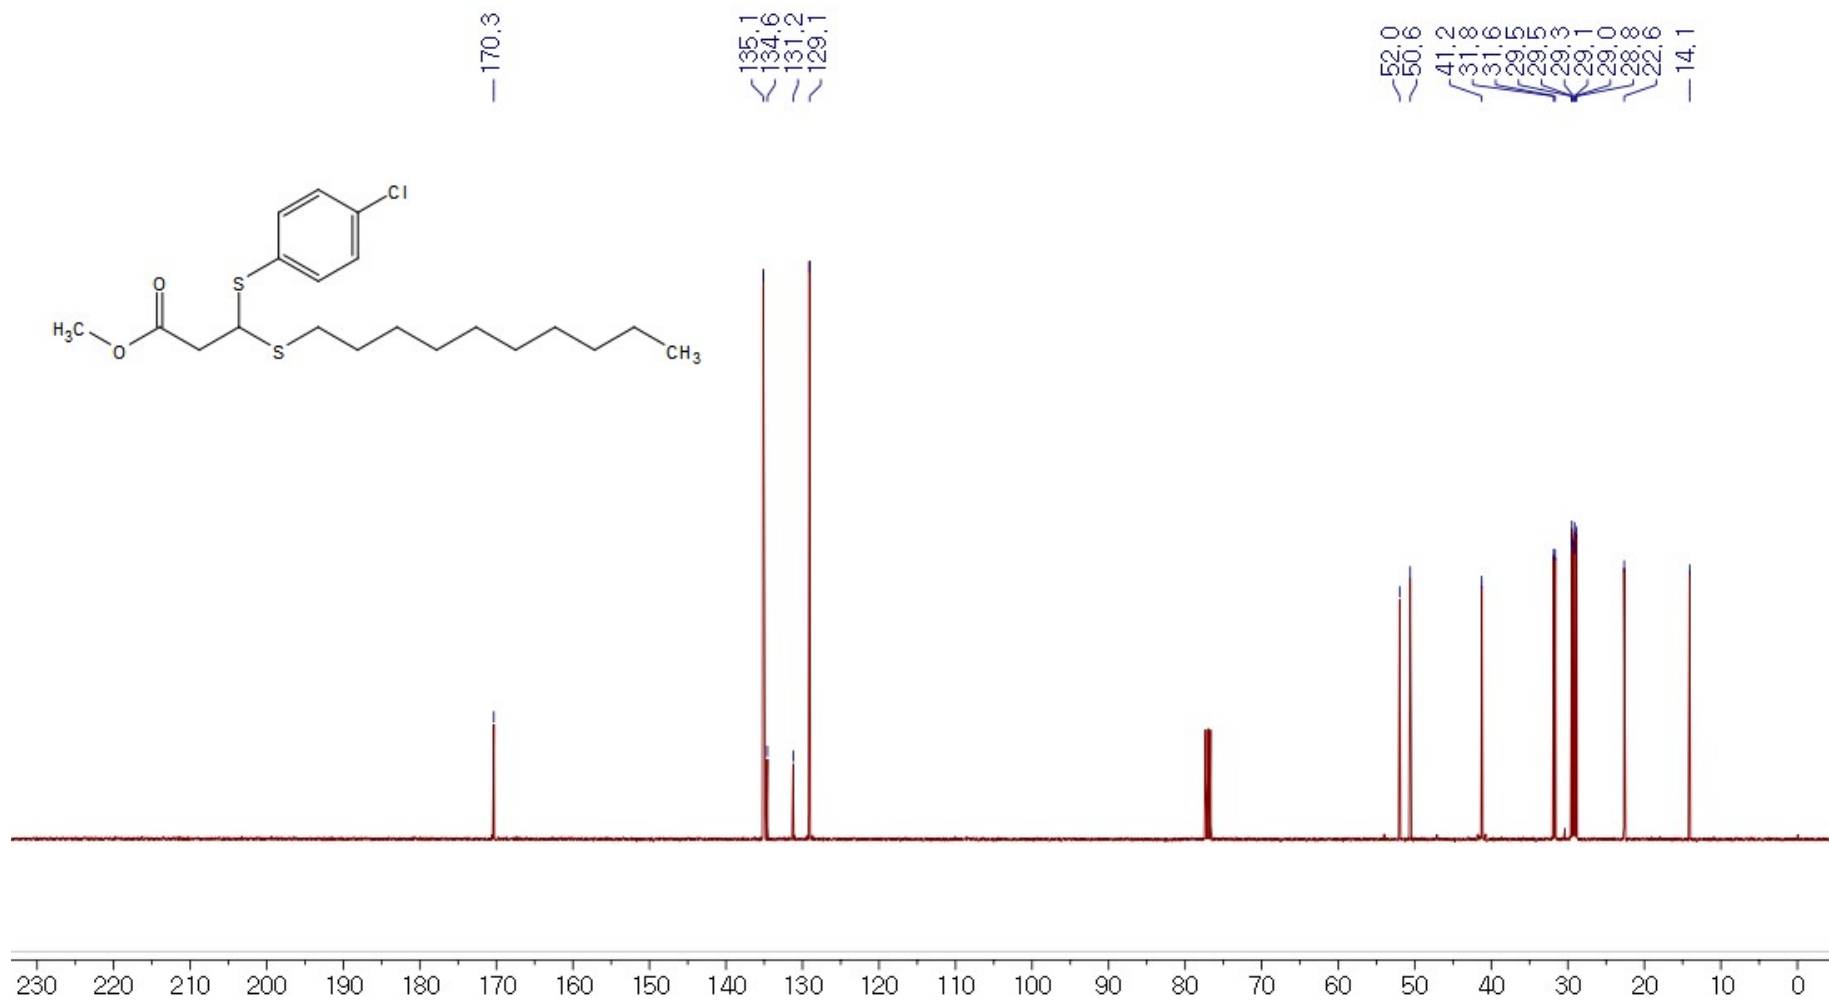

<sup>13</sup>C NMR (100 MHz, CDCl<sub>3</sub>) spectra of Methyl 3-((4-chlorophenyl)thio)-3-(decylthio)propanoate (**3ad**)

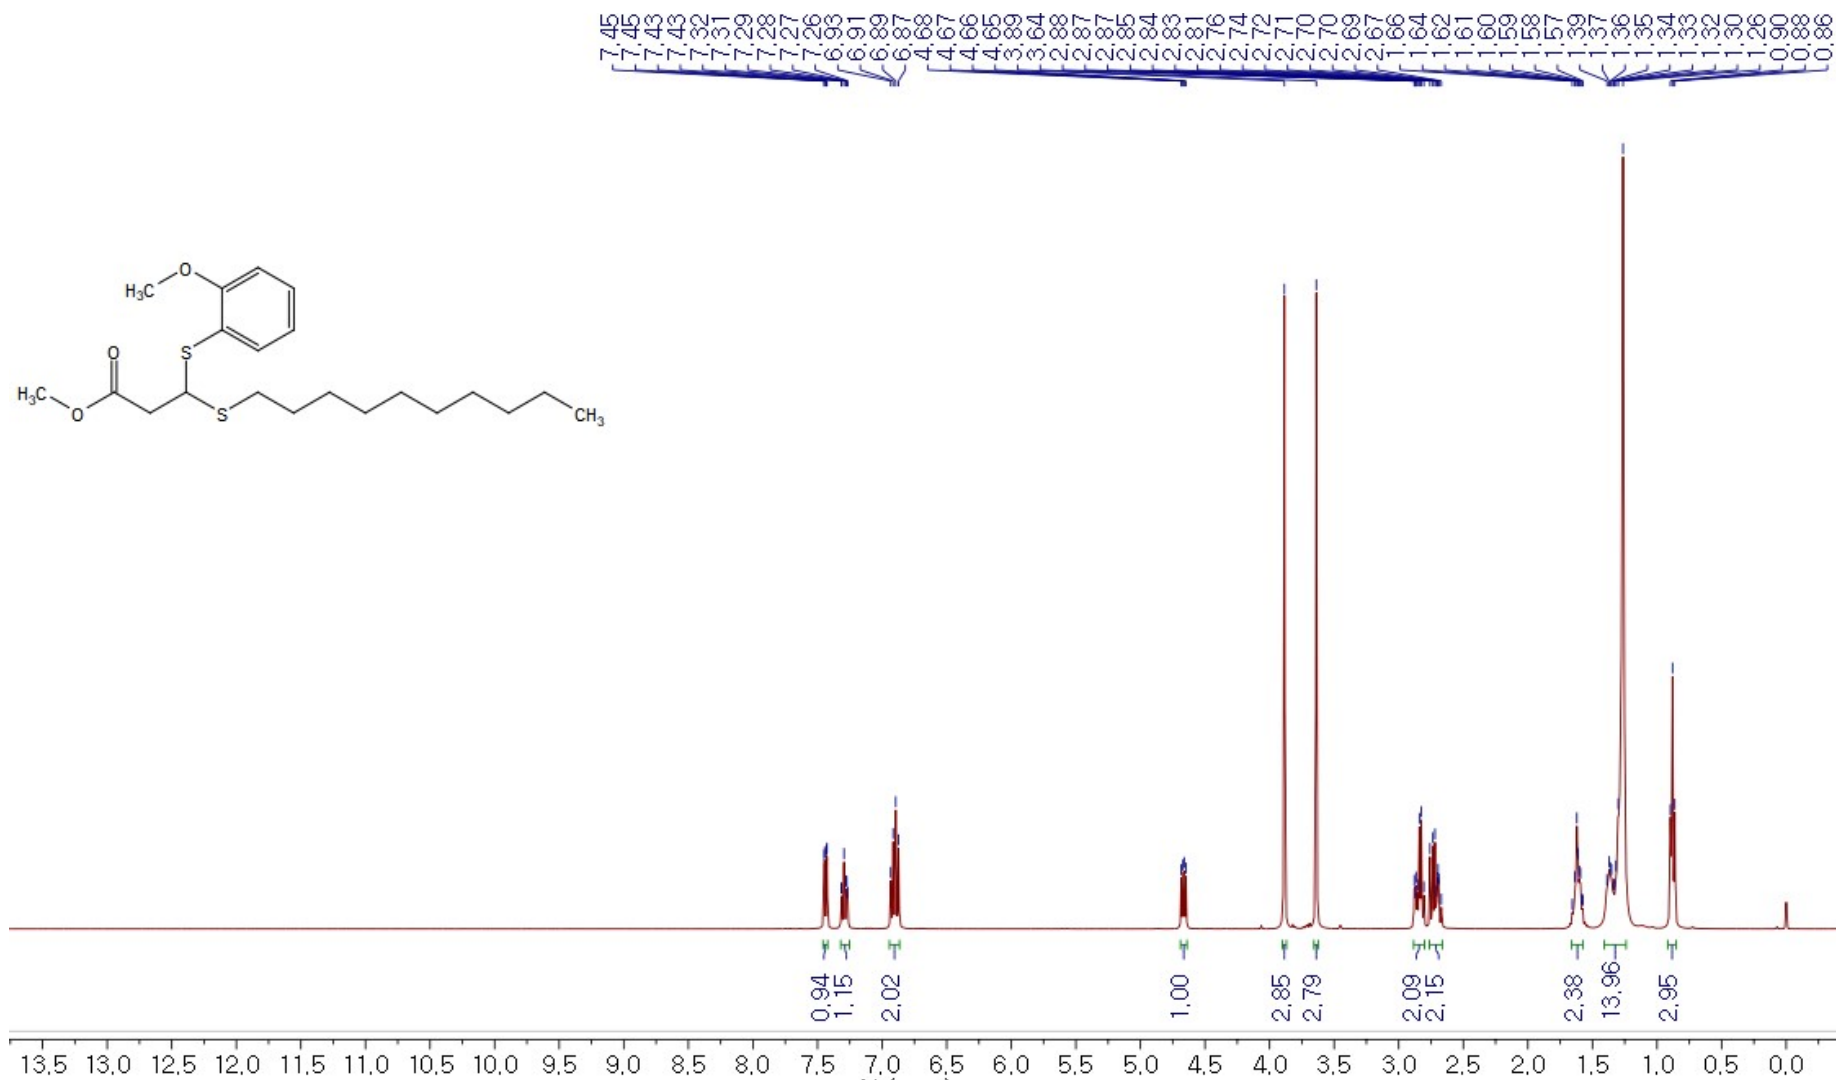

<sup>1</sup>H NMR (400 MHz, CDCl<sub>3</sub>) spectra of Methyl 3-(decylthio)-3-((2-methoxyphenyl)thio)propanoate (**3ae**)

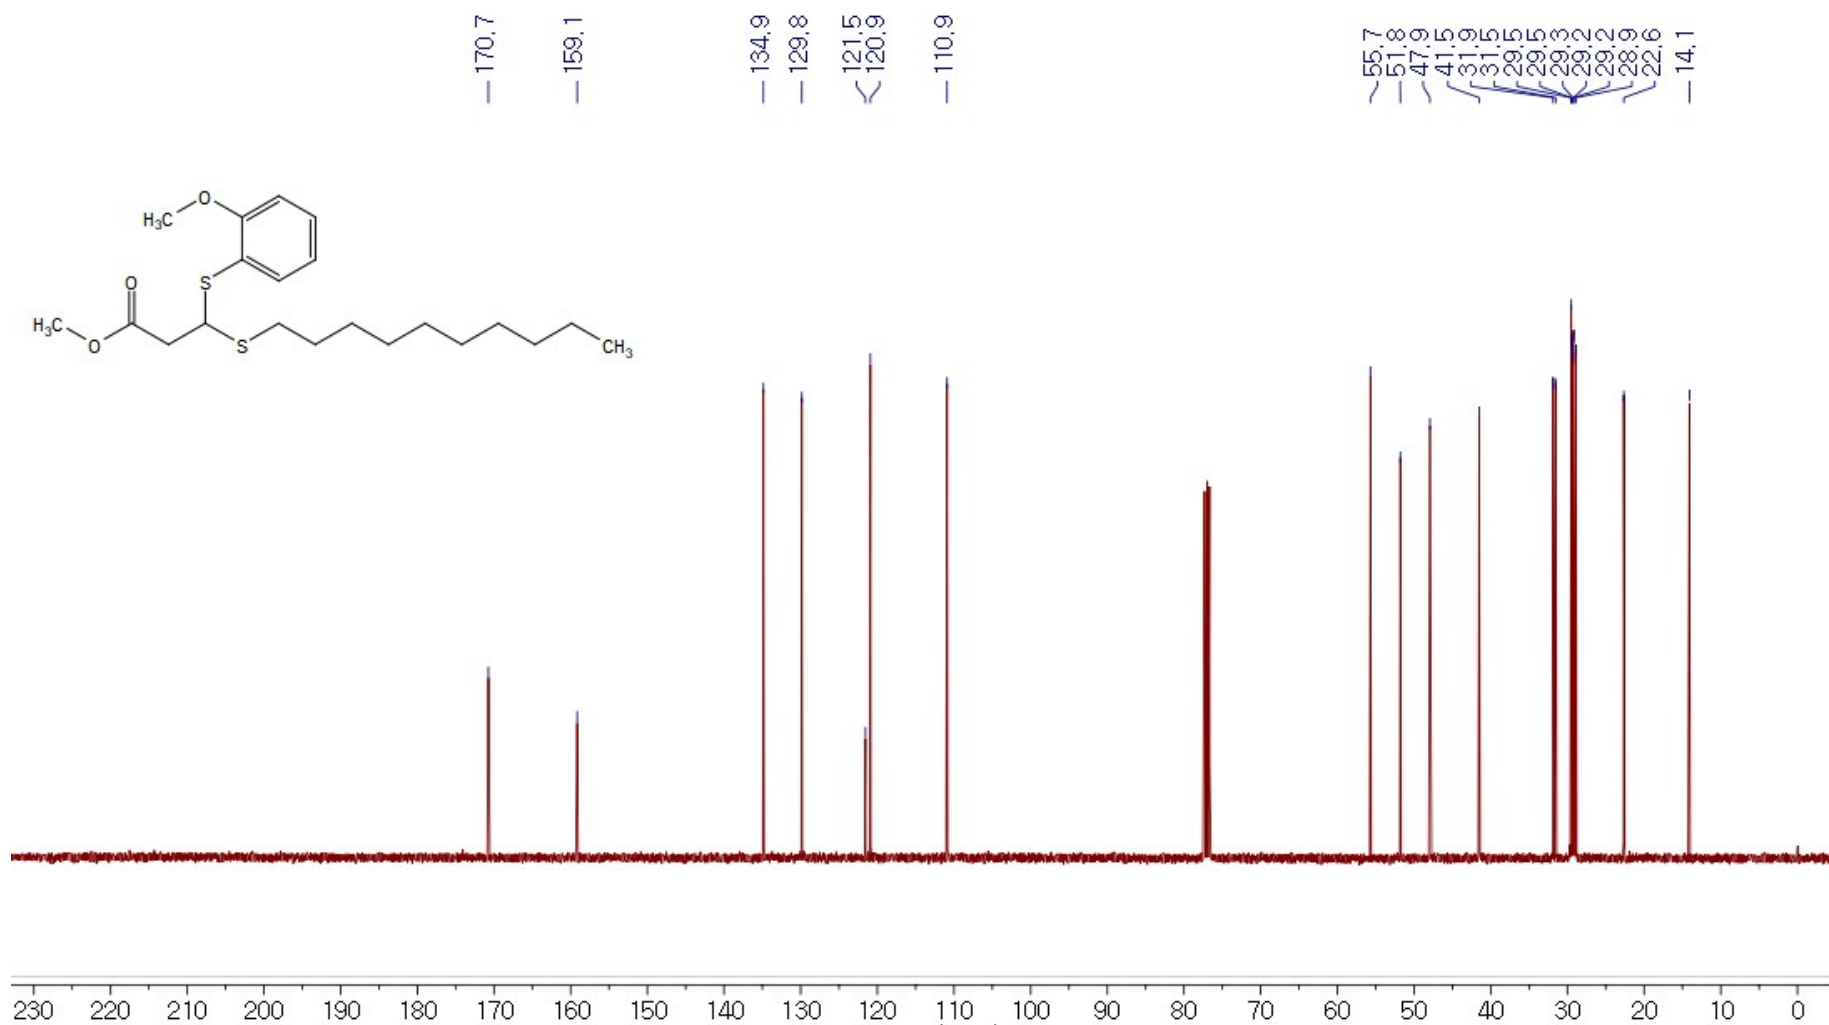

<sup>13</sup>C NMR (100 MHz, CDCl<sub>3</sub>) spectra of Methyl 3-(decylthio)-3-((2-methoxyphenyl)thio)propanoate (**3ae**)



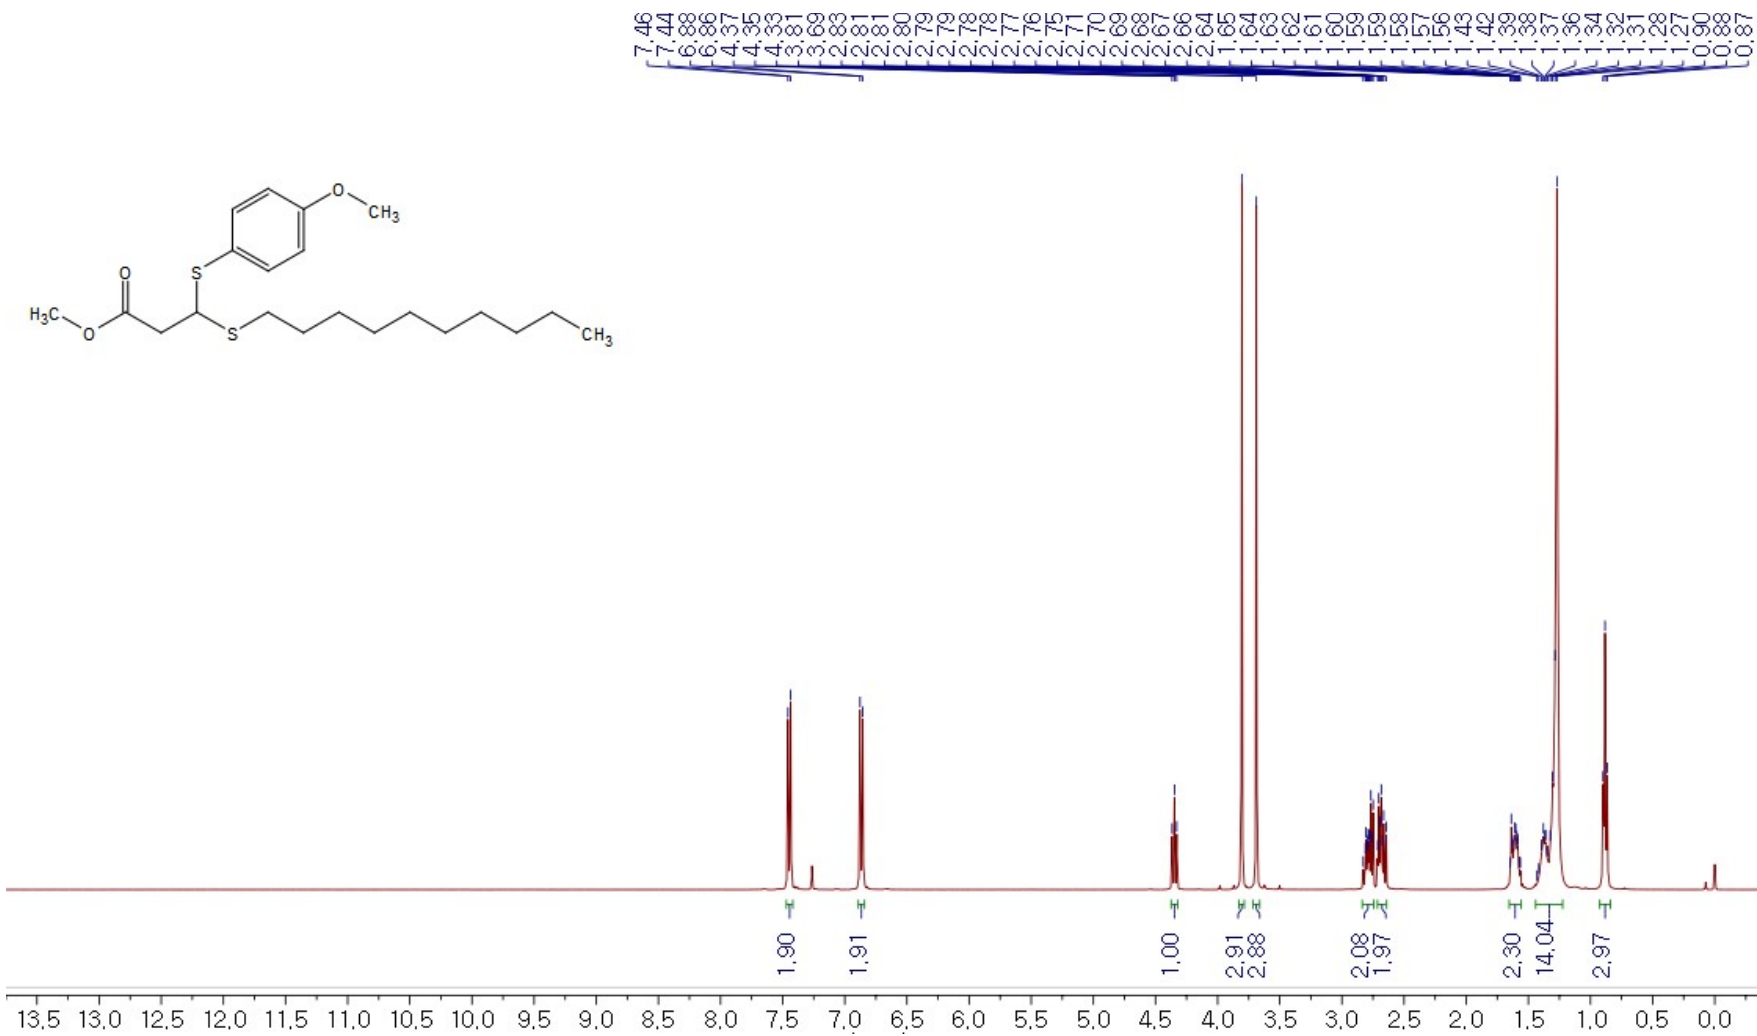

<sup>1</sup>H NMR (400 MHz, CDCl<sub>3</sub>) spectra of Methyl 3-(decylthio)-3-((4-methoxyphenyl)thio)propanoate (**3af**)

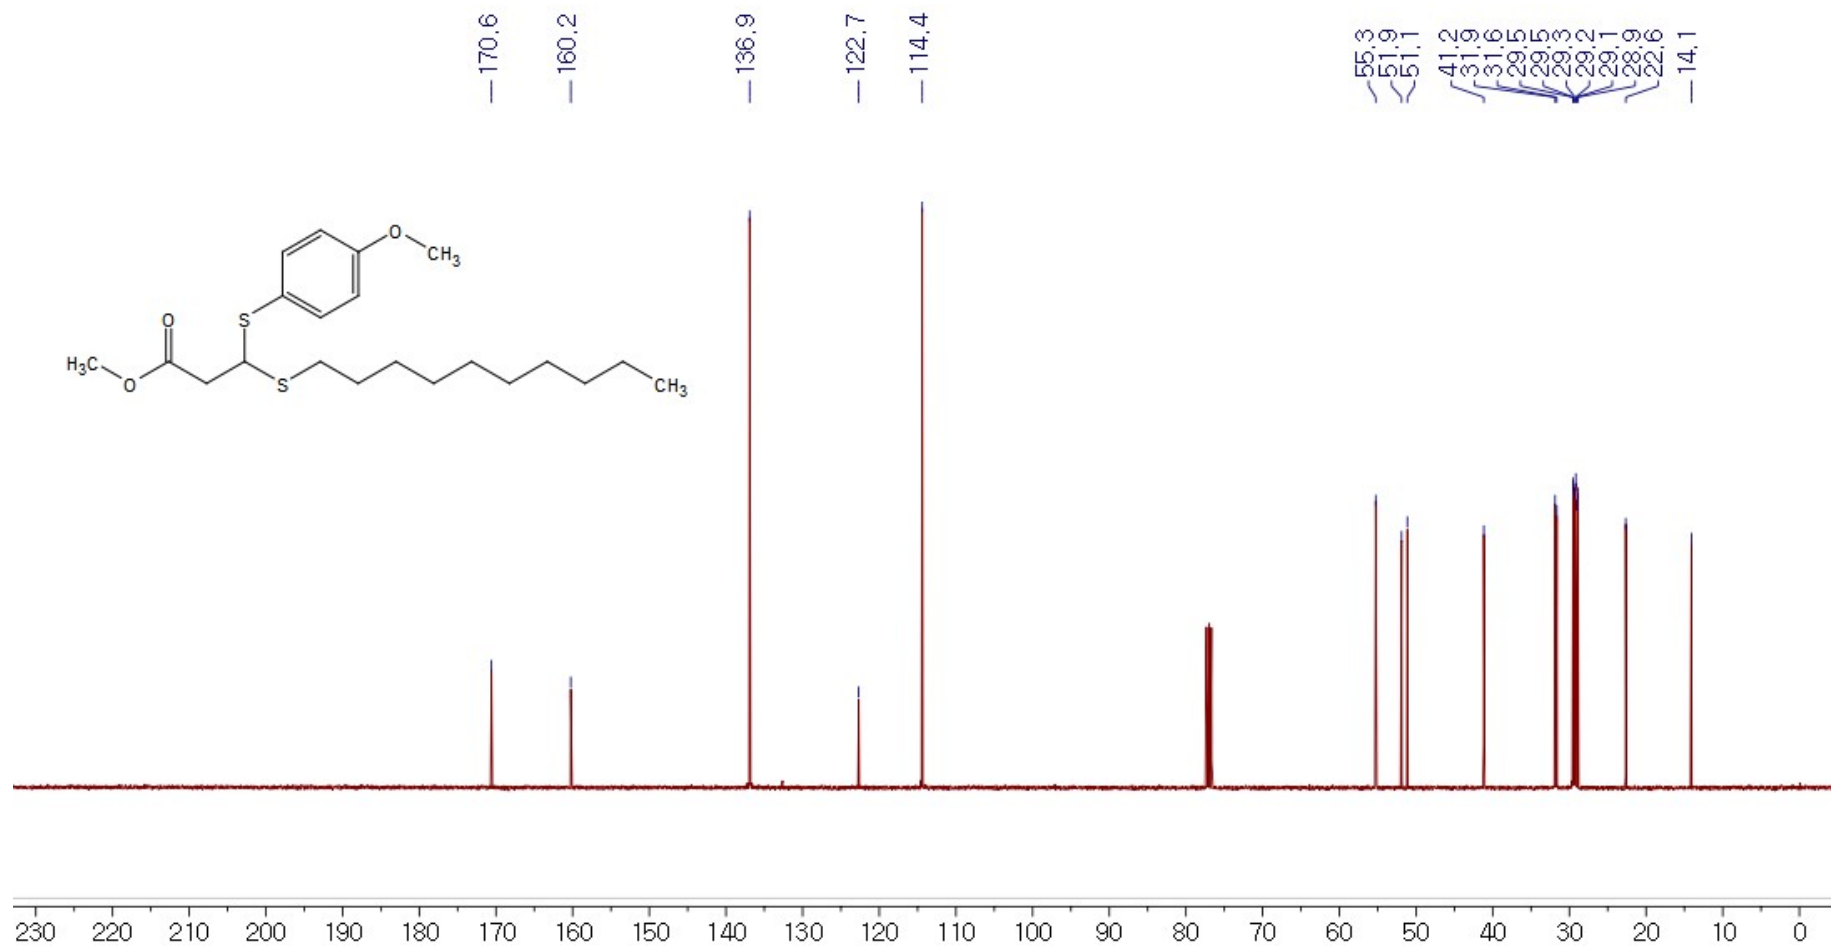

$^{13}\text{C}$  NMR (100 MHz,  $\text{CDCl}_3$ ) spectra of Methyl 3-(decylthio)-3-((4-methoxyphenyl)thio)propanoate (**3af**)

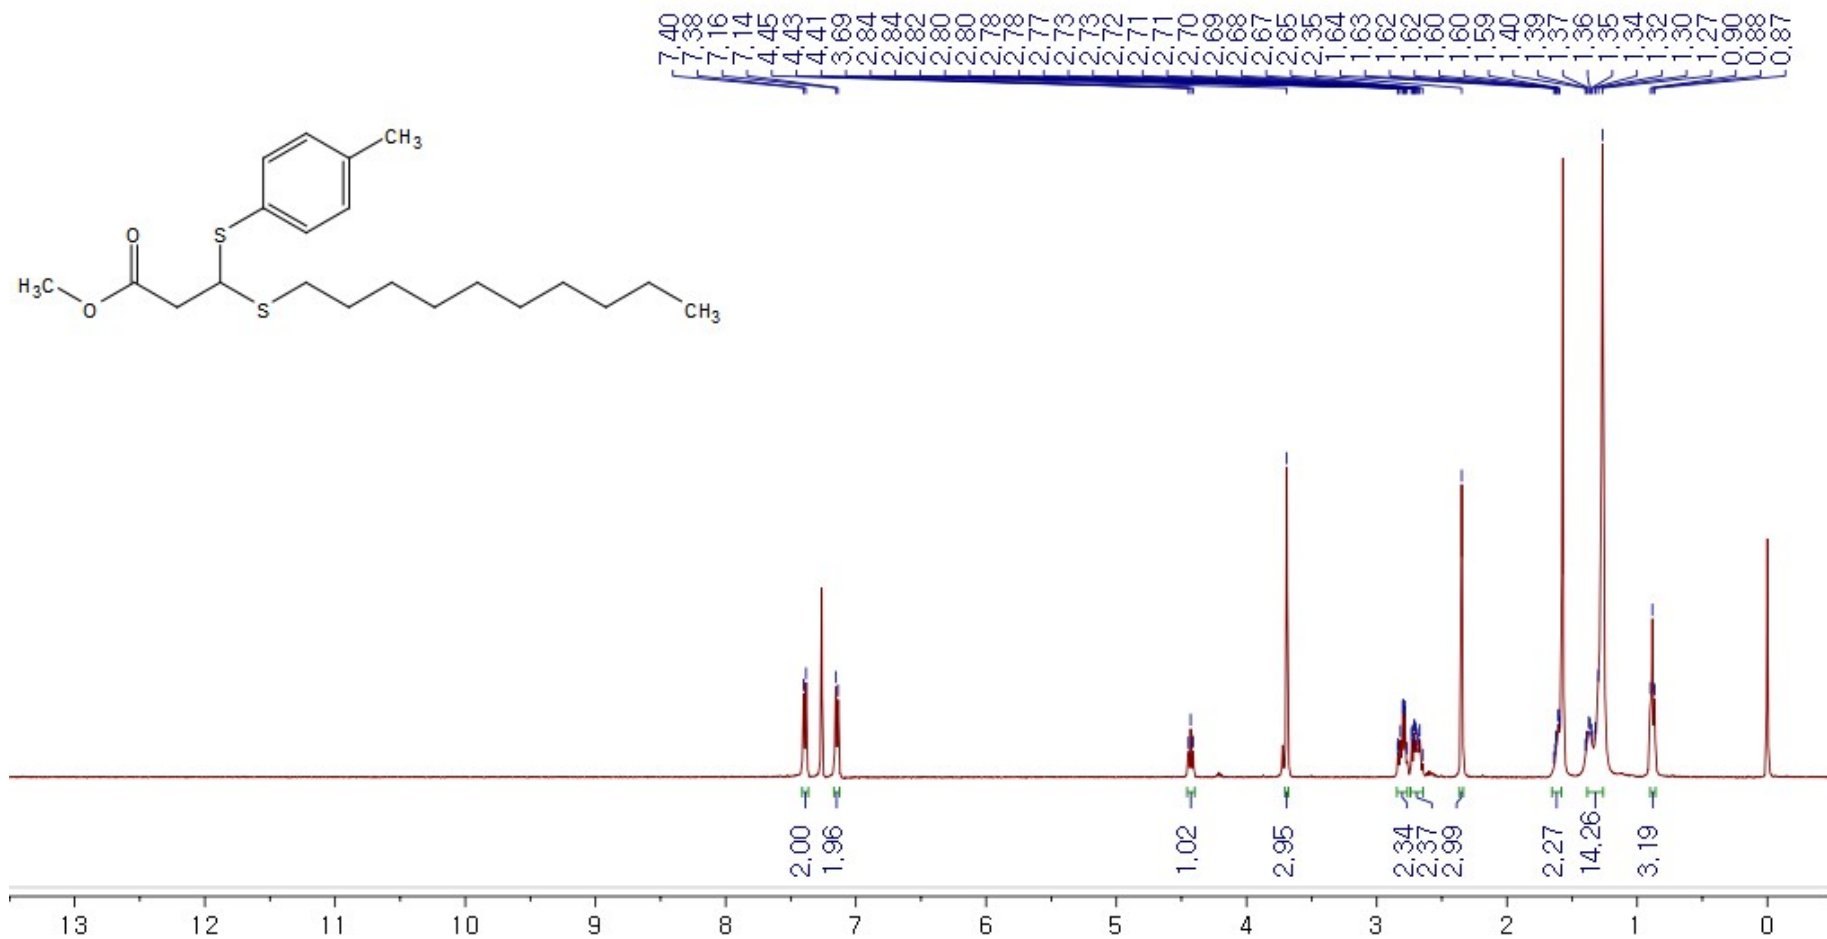

<sup>1</sup>H NMR (400 MHz, CDCl<sub>3</sub>) spectra of Methyl 3-(decylthio)-3-(p-tolylthio)propanoate (**3ag**)

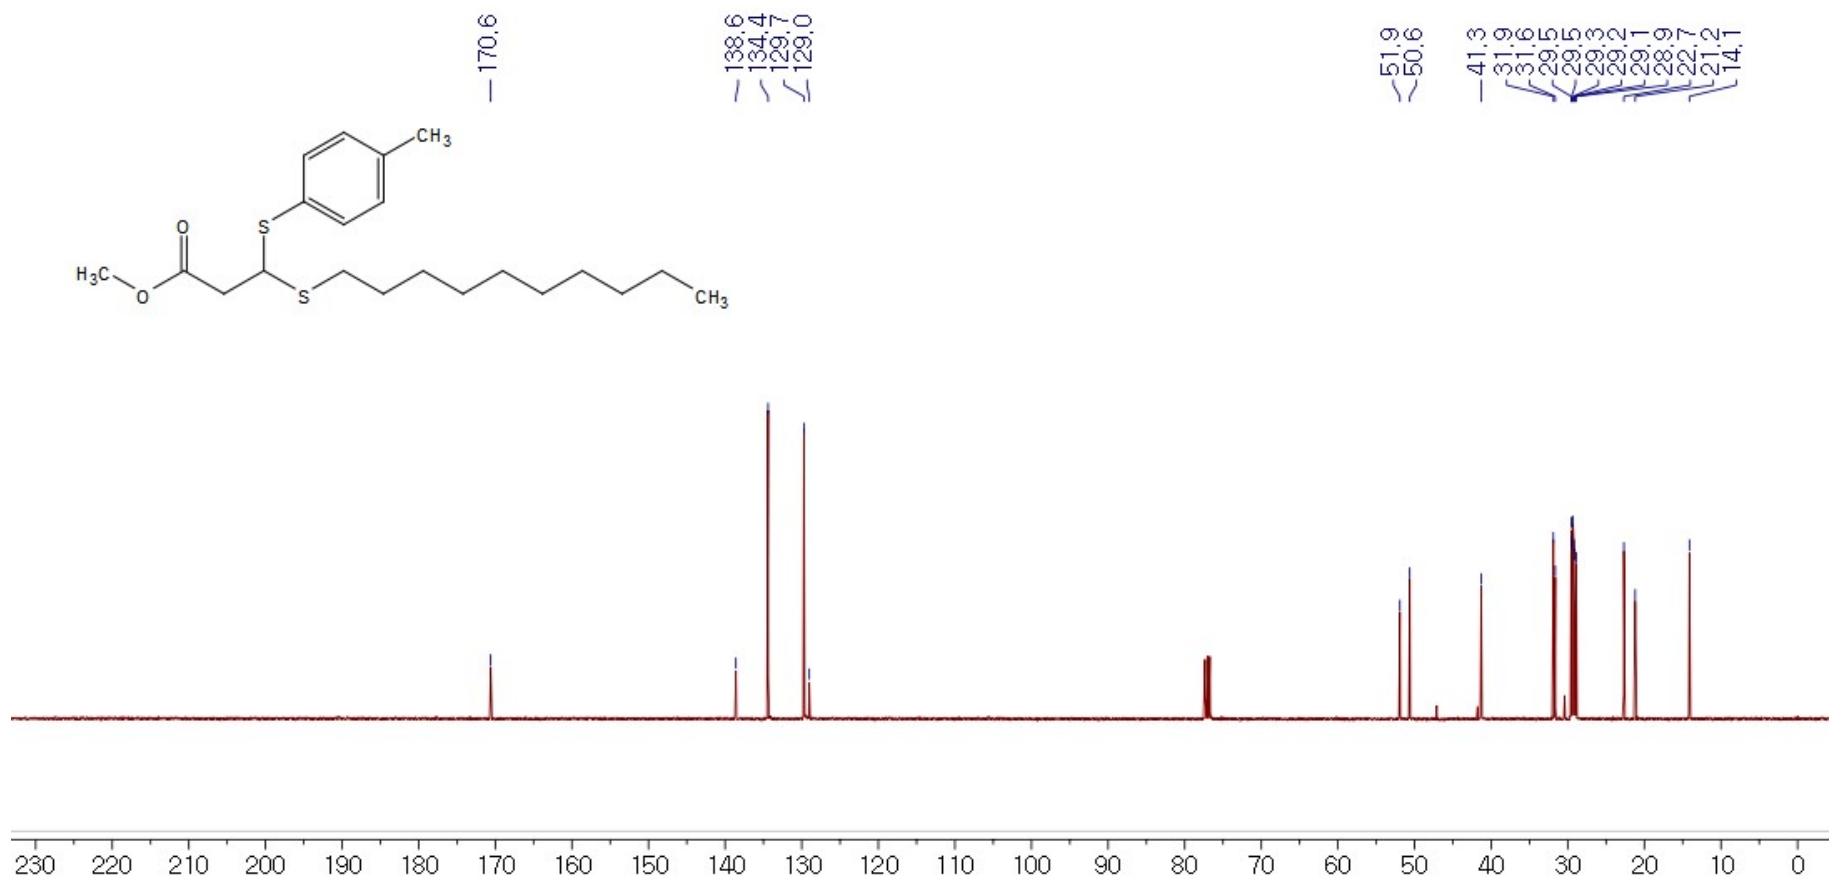

<sup>13</sup>C NMR (100 MHz, CDCl<sub>3</sub>) spectra of Methyl 3-(decylthio)-3-(*p*-tolylthio)propanoate (**3ag**)

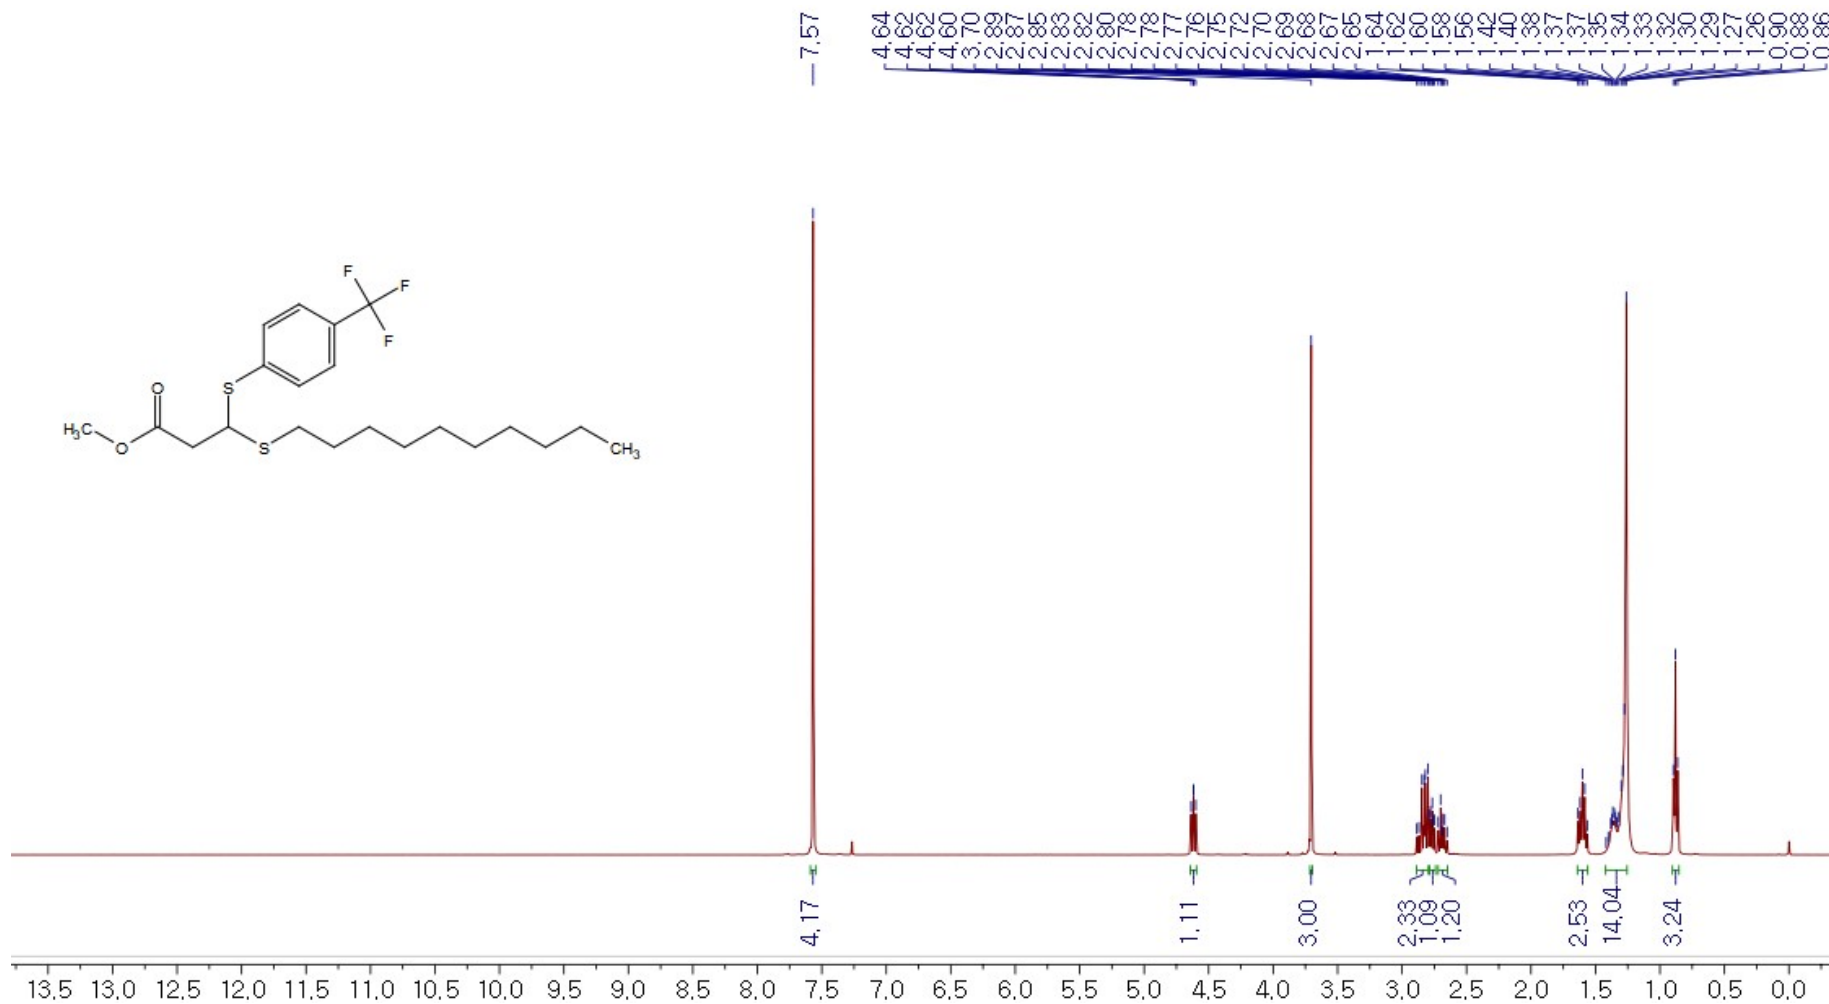

<sup>1</sup>H NMR (400 MHz, CDCl<sub>3</sub>) spectra of Methyl 3-(decylthio)-3-((4-(trifluoromethyl)phenyl)thio)propanoate (**3ah**)

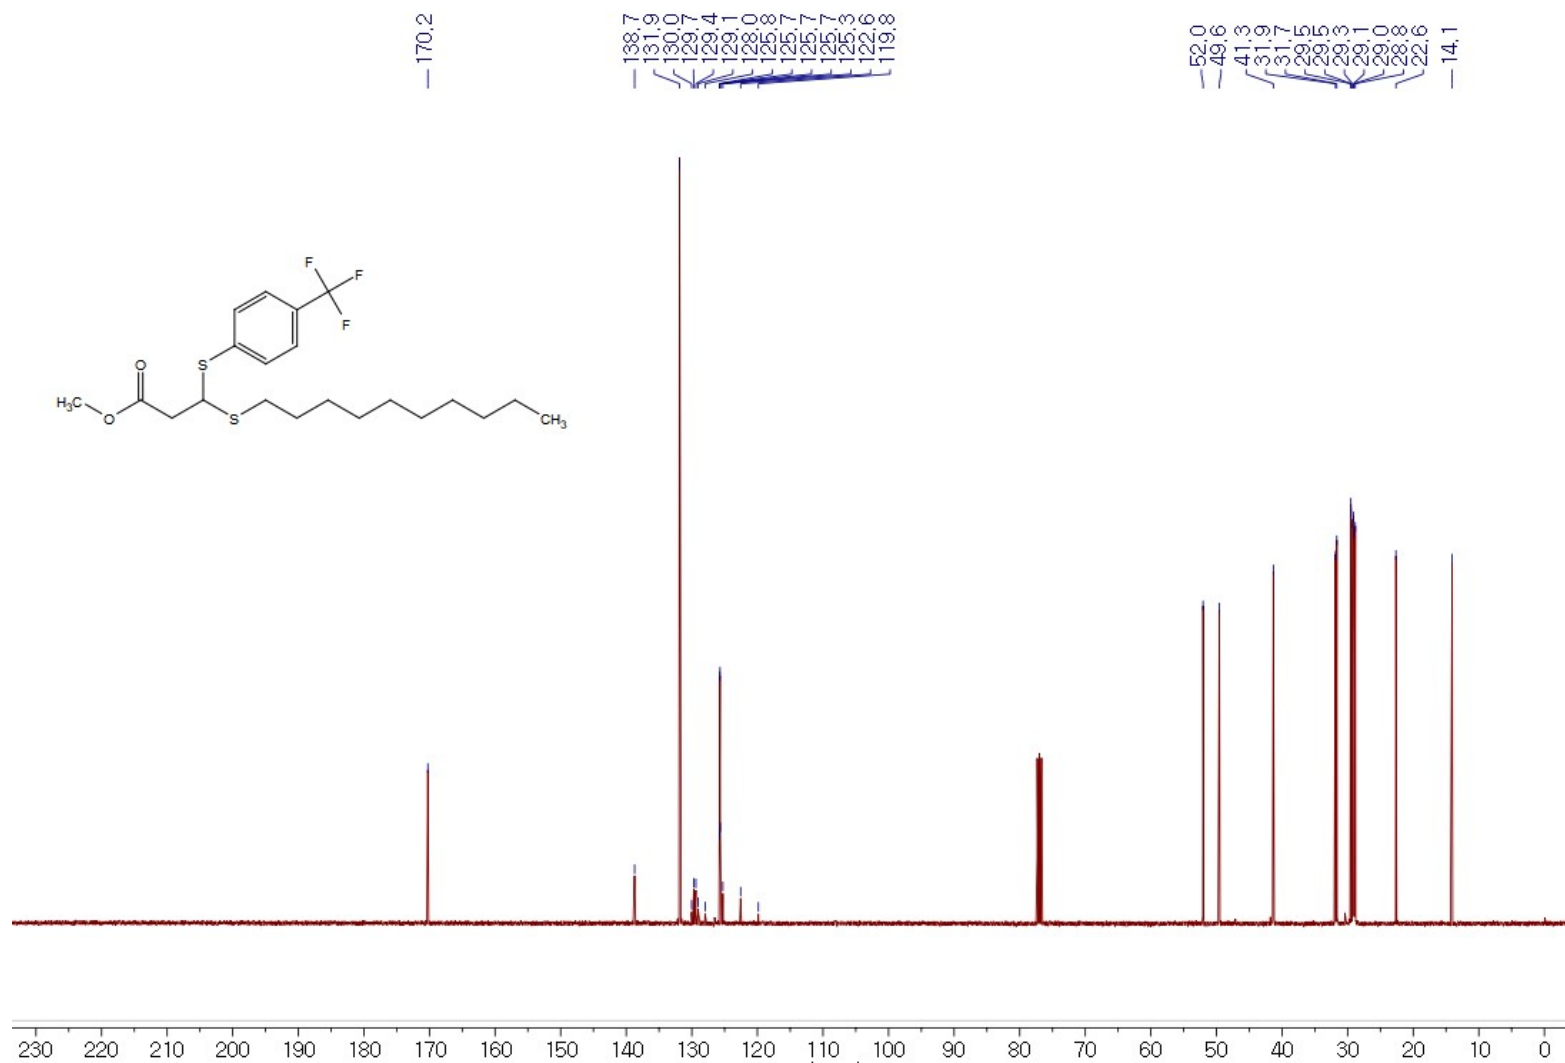

<sup>13</sup>C NMR (100 MHz, CDCl<sub>3</sub>) spectra of Methyl 3-(decylthio)-3-(4-(trifluoromethyl)phenylthio)propanoate (**3ah**)

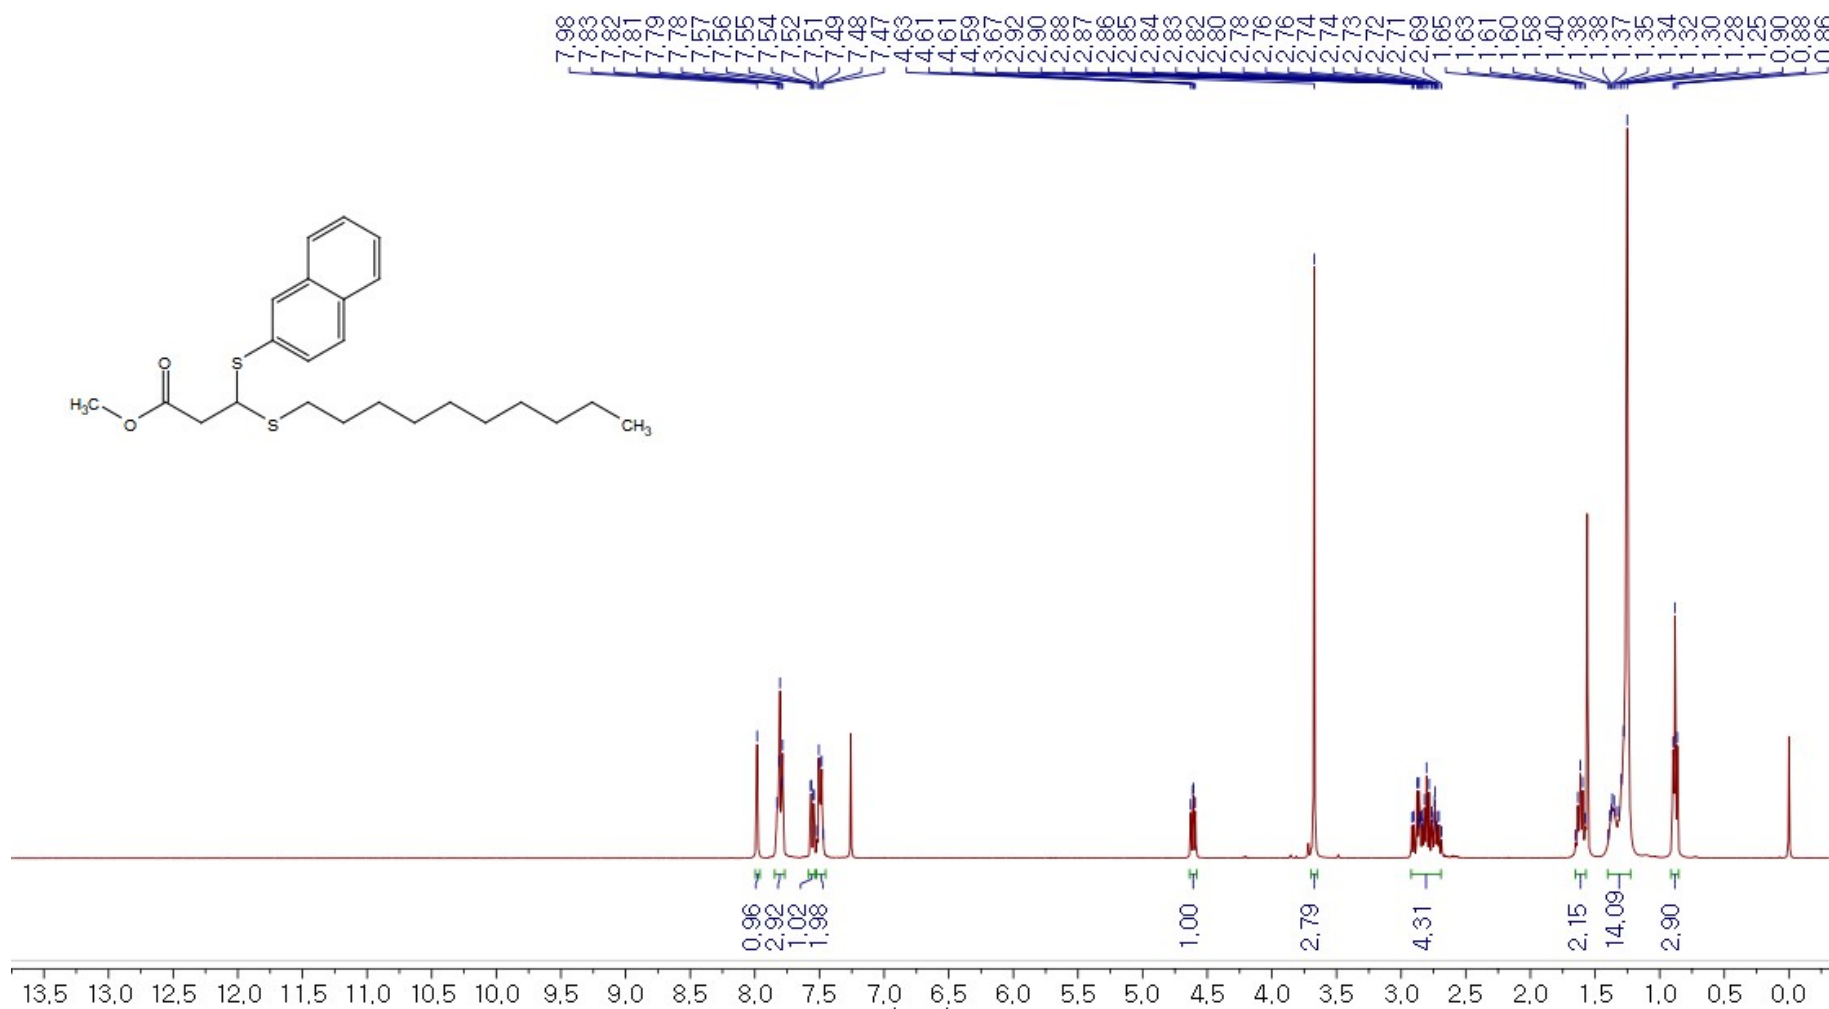

<sup>1</sup>H NMR (400 MHz, CDCl<sub>3</sub>) spectra of Methyl 3-(decylthio)-3-(naphthalen-2-ylthio)propanoate (**3ai**)

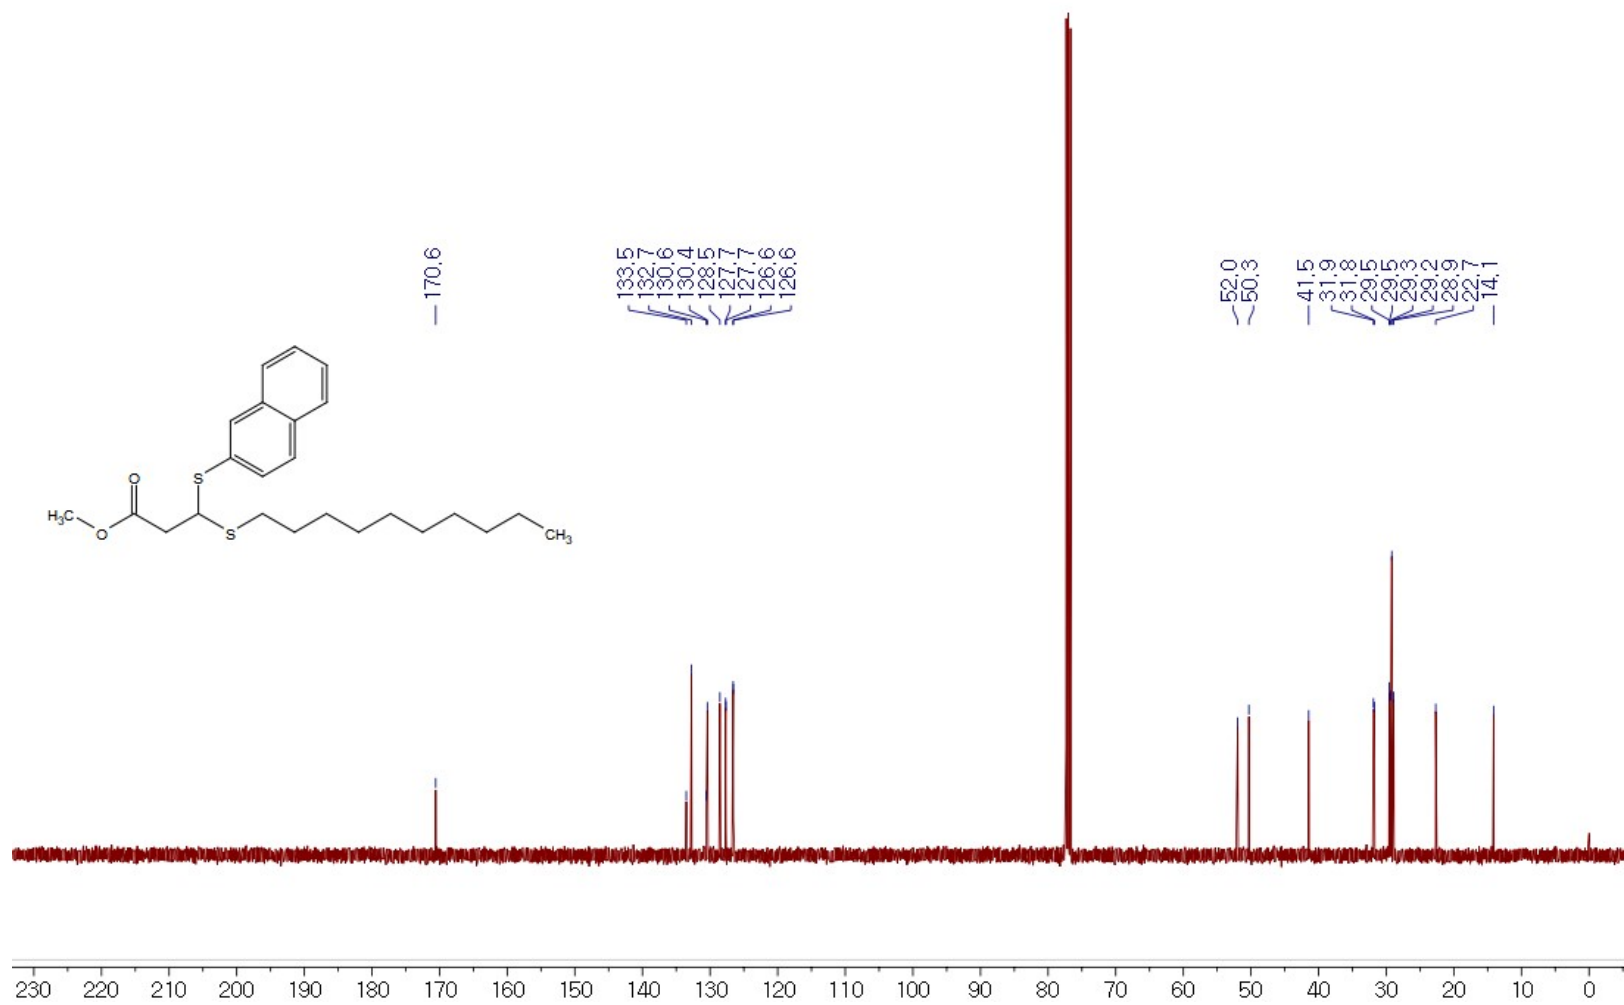

$^{13}\text{C}$  NMR (100 MHz,  $\text{CDCl}_3$ ) spectra of Methyl 3-(decylthio)-3-(naphthalen-2-ylthio)propanoate (**3ai**)



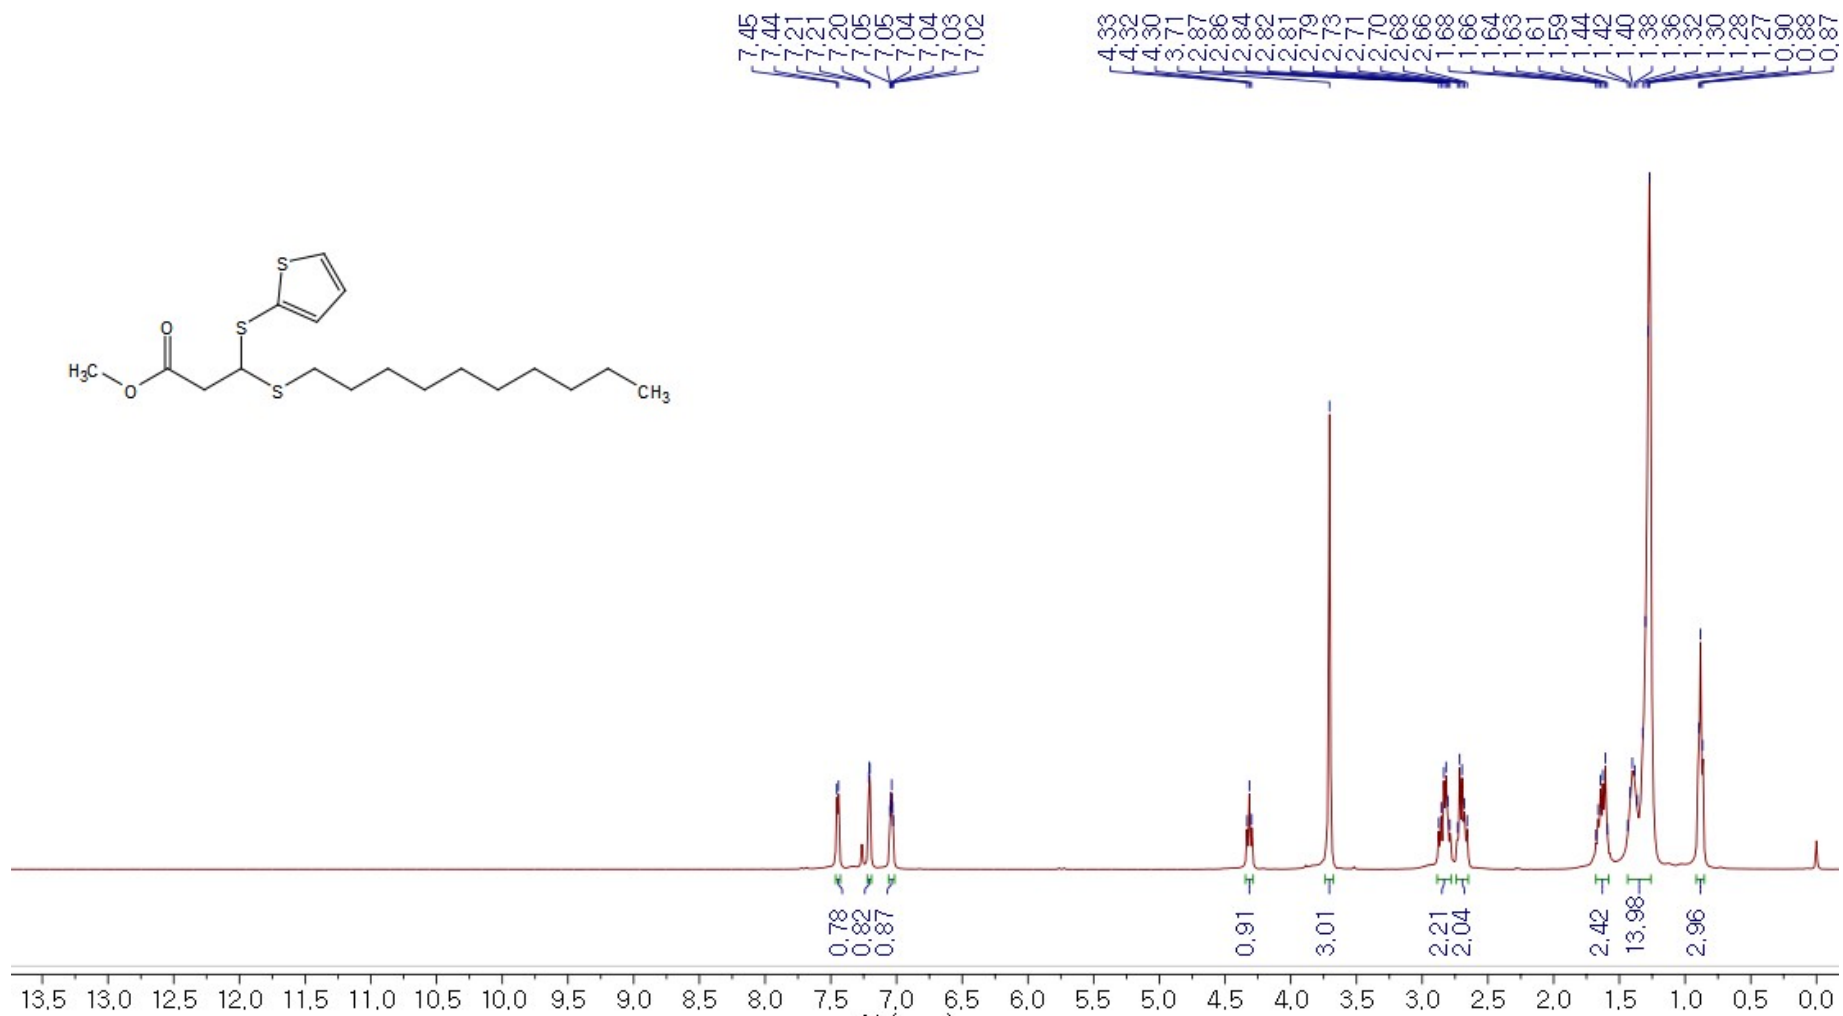

<sup>1</sup>H NMR (400 MHz, CDCl<sub>3</sub>) spectra of Methyl 3-(decylthio)-3-(thiophen-2-ylthio)propanoate (**3aj**)

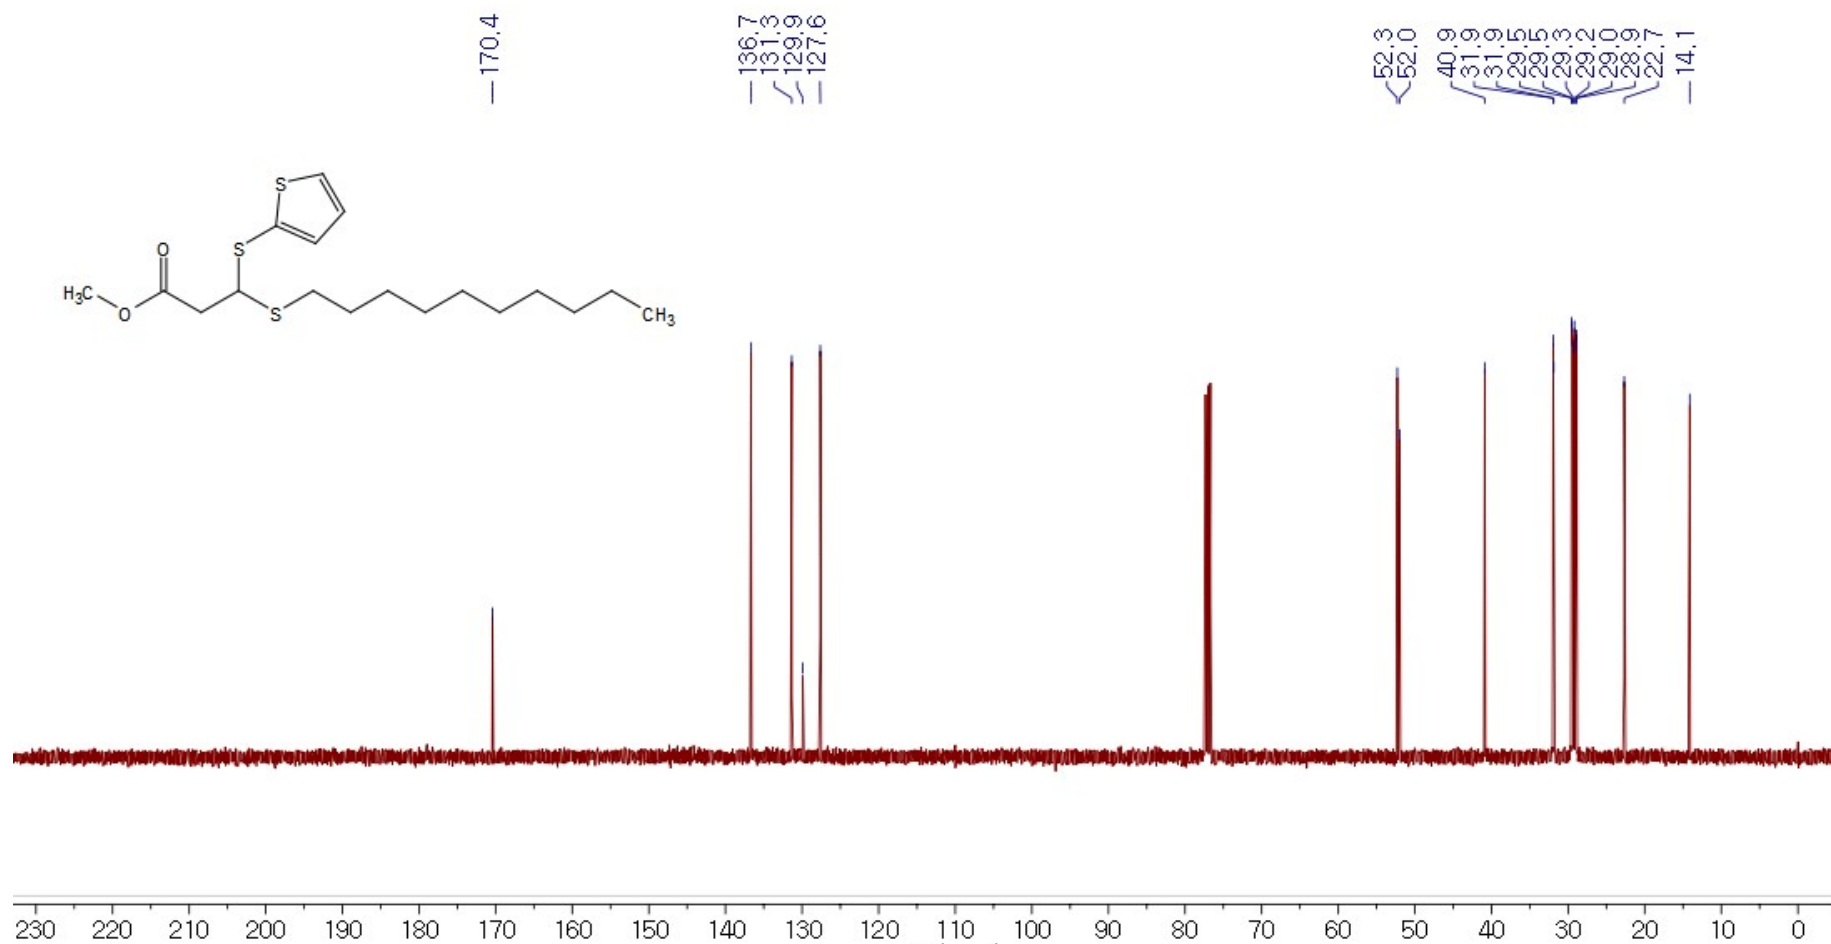

<sup>13</sup>C NMR (100 MHz, CDCl<sub>3</sub>) spectra of Methyl 3-(decylthio)-3-(thiophen-2-ylthio)propanoate (**3aj**)

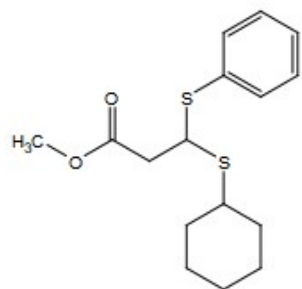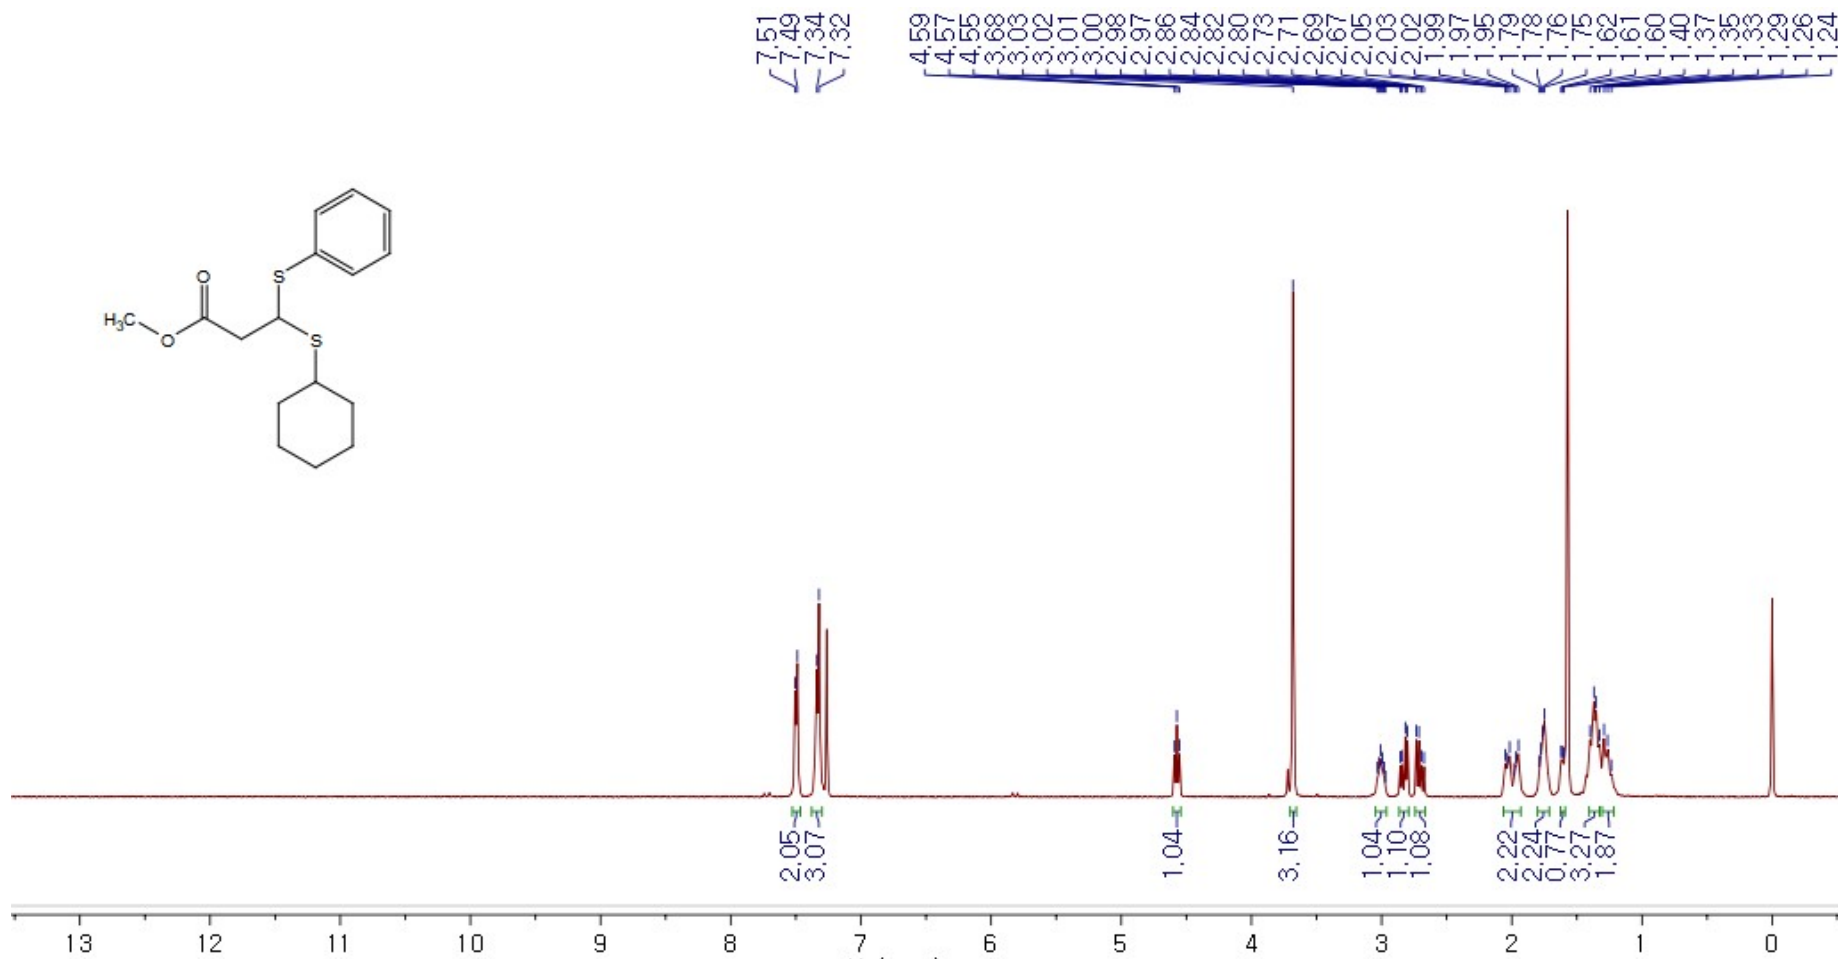

$^1\text{H}$  NMR (400 MHz,  $\text{CDCl}_3$ ) spectra of Methyl 3-(cyclohexylthio)-3-(phenylthio)propanoate (**3ba**)

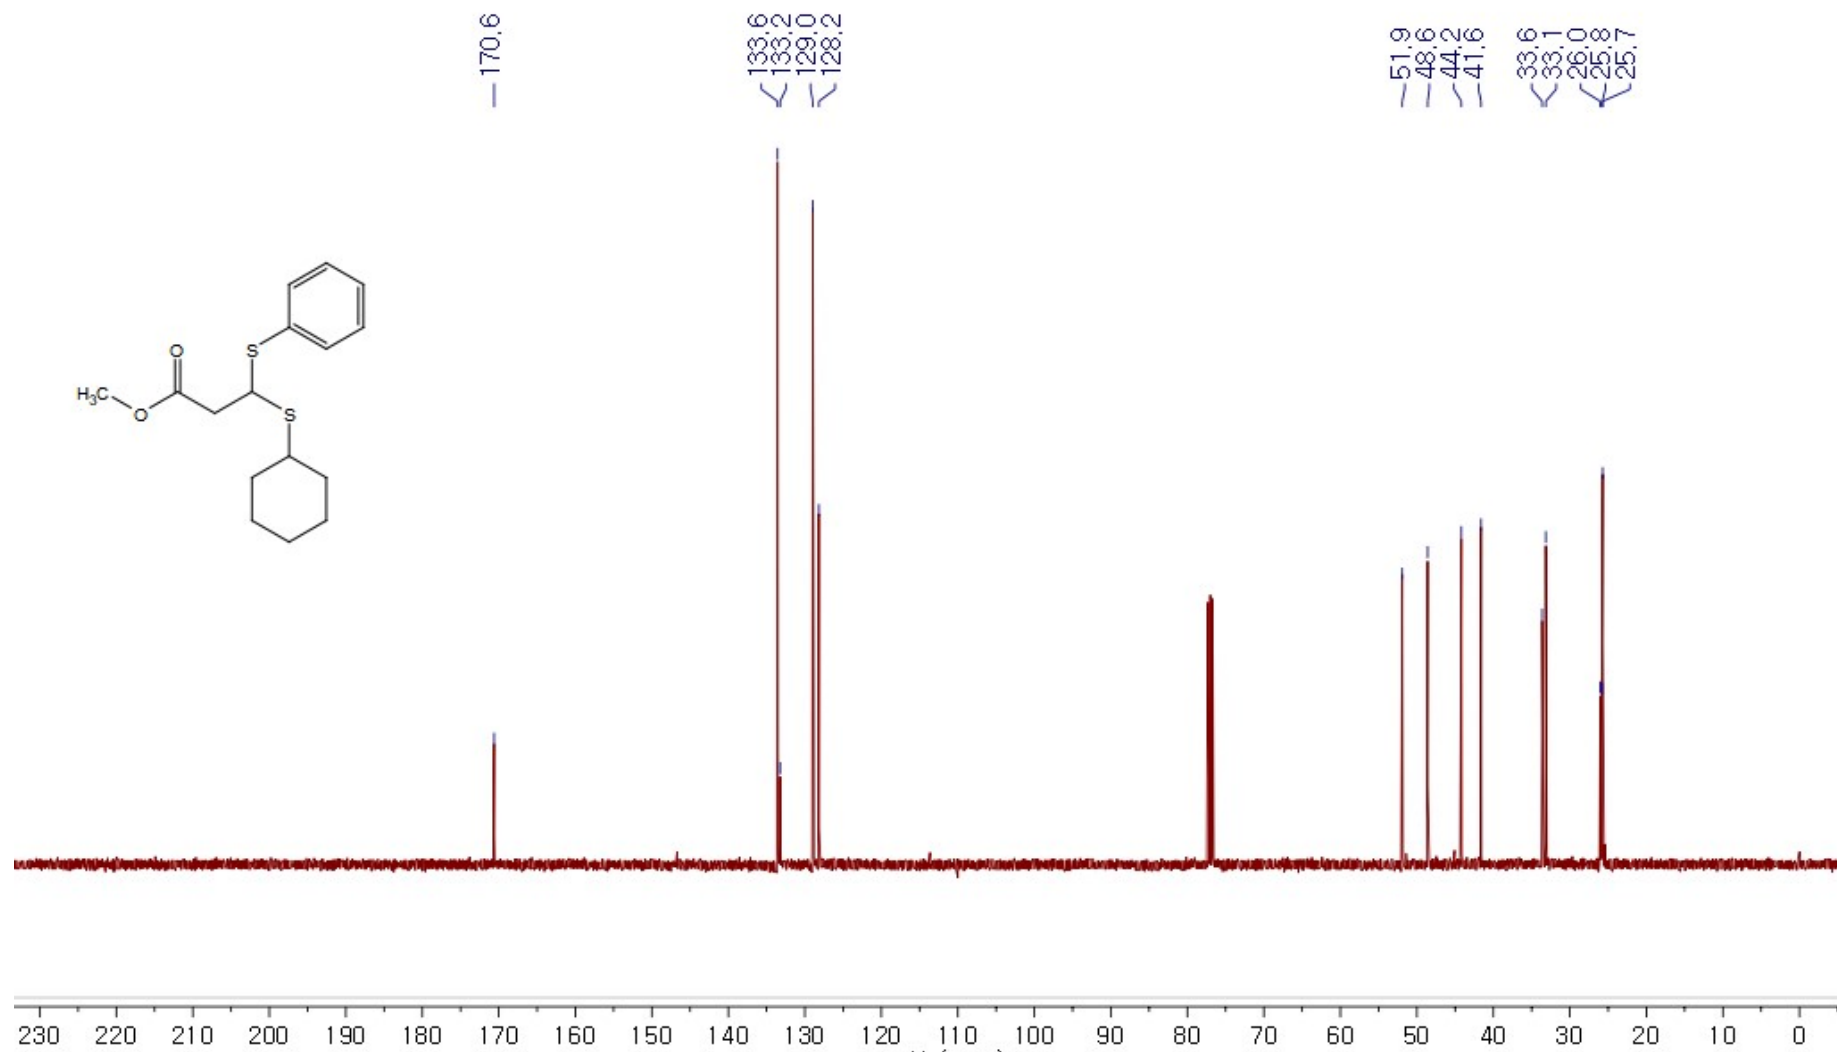

<sup>13</sup>C NMR (100 MHz, CDCl<sub>3</sub>) spectra of Methyl 3-(cyclohexylthio)-3-(phenylthio)propanoate (**3ba**)

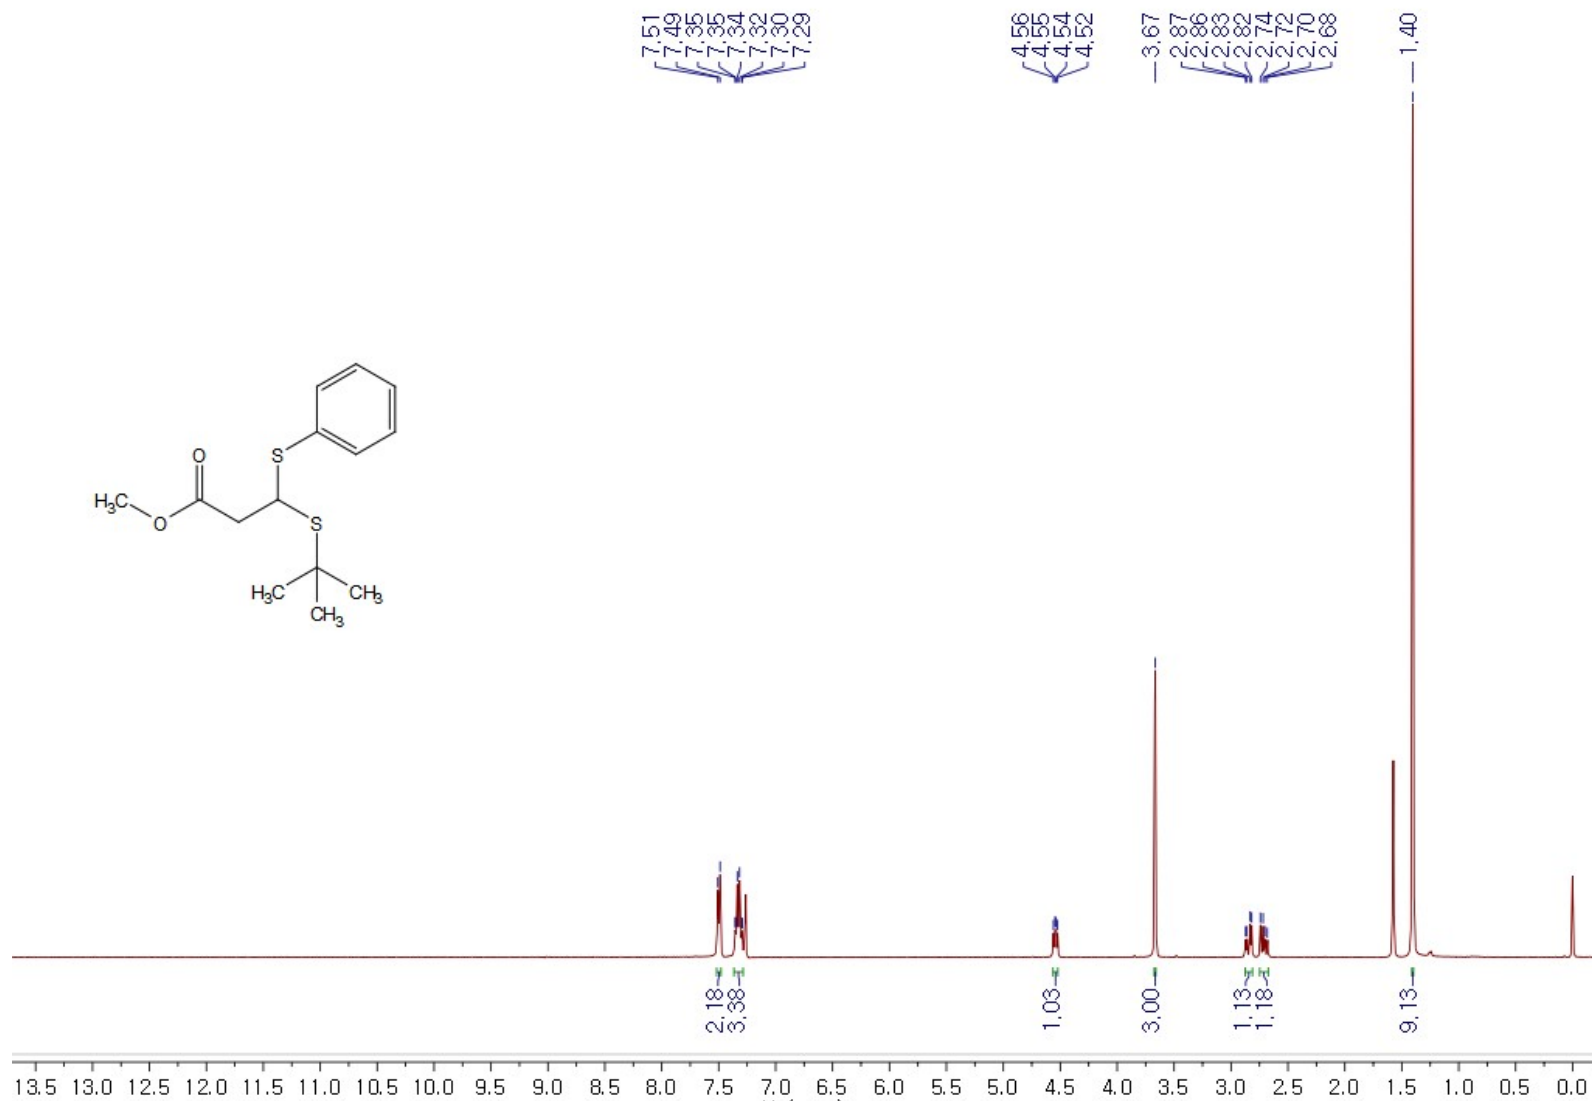

<sup>1</sup>H NMR (400 MHz, CDCl<sub>3</sub>) spectra of Methyl 3-(tert-butylthio)-3-(phenylthio)propanoate (**3ca**)

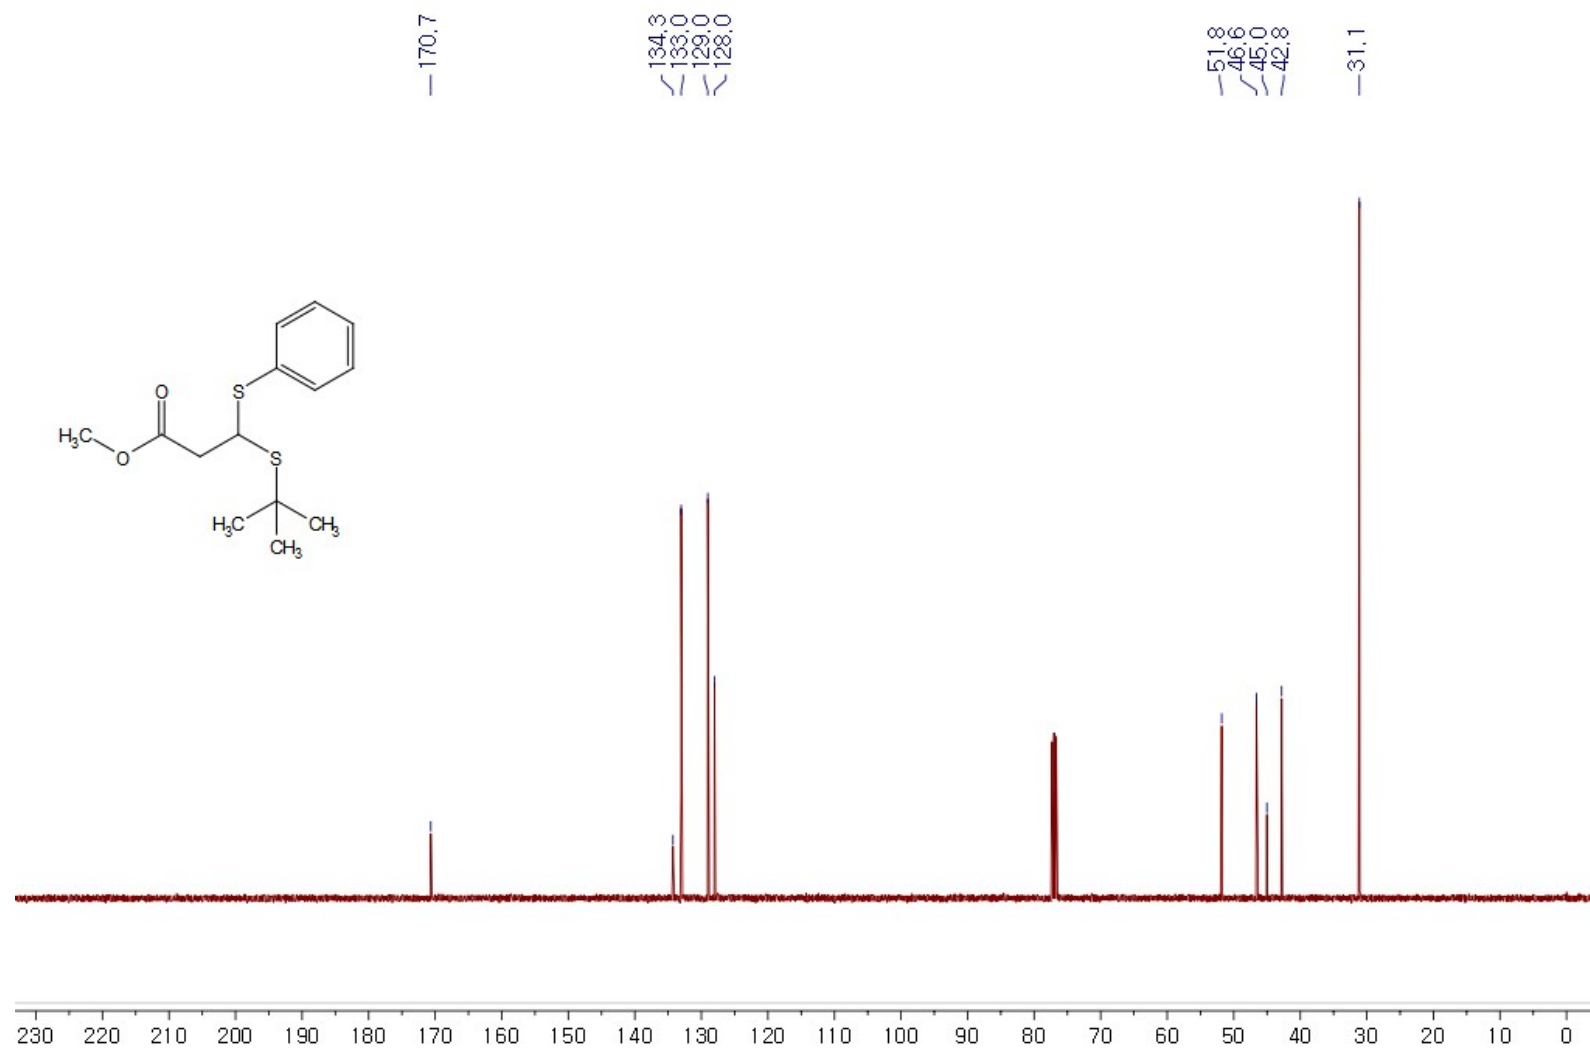

$^{13}\text{C}$  NMR (100 MHz,  $\text{CDCl}_3$ ) spectra of Methyl 3-(tert-butylthio)-3-(phenylthio)propanoate (**3ca**)

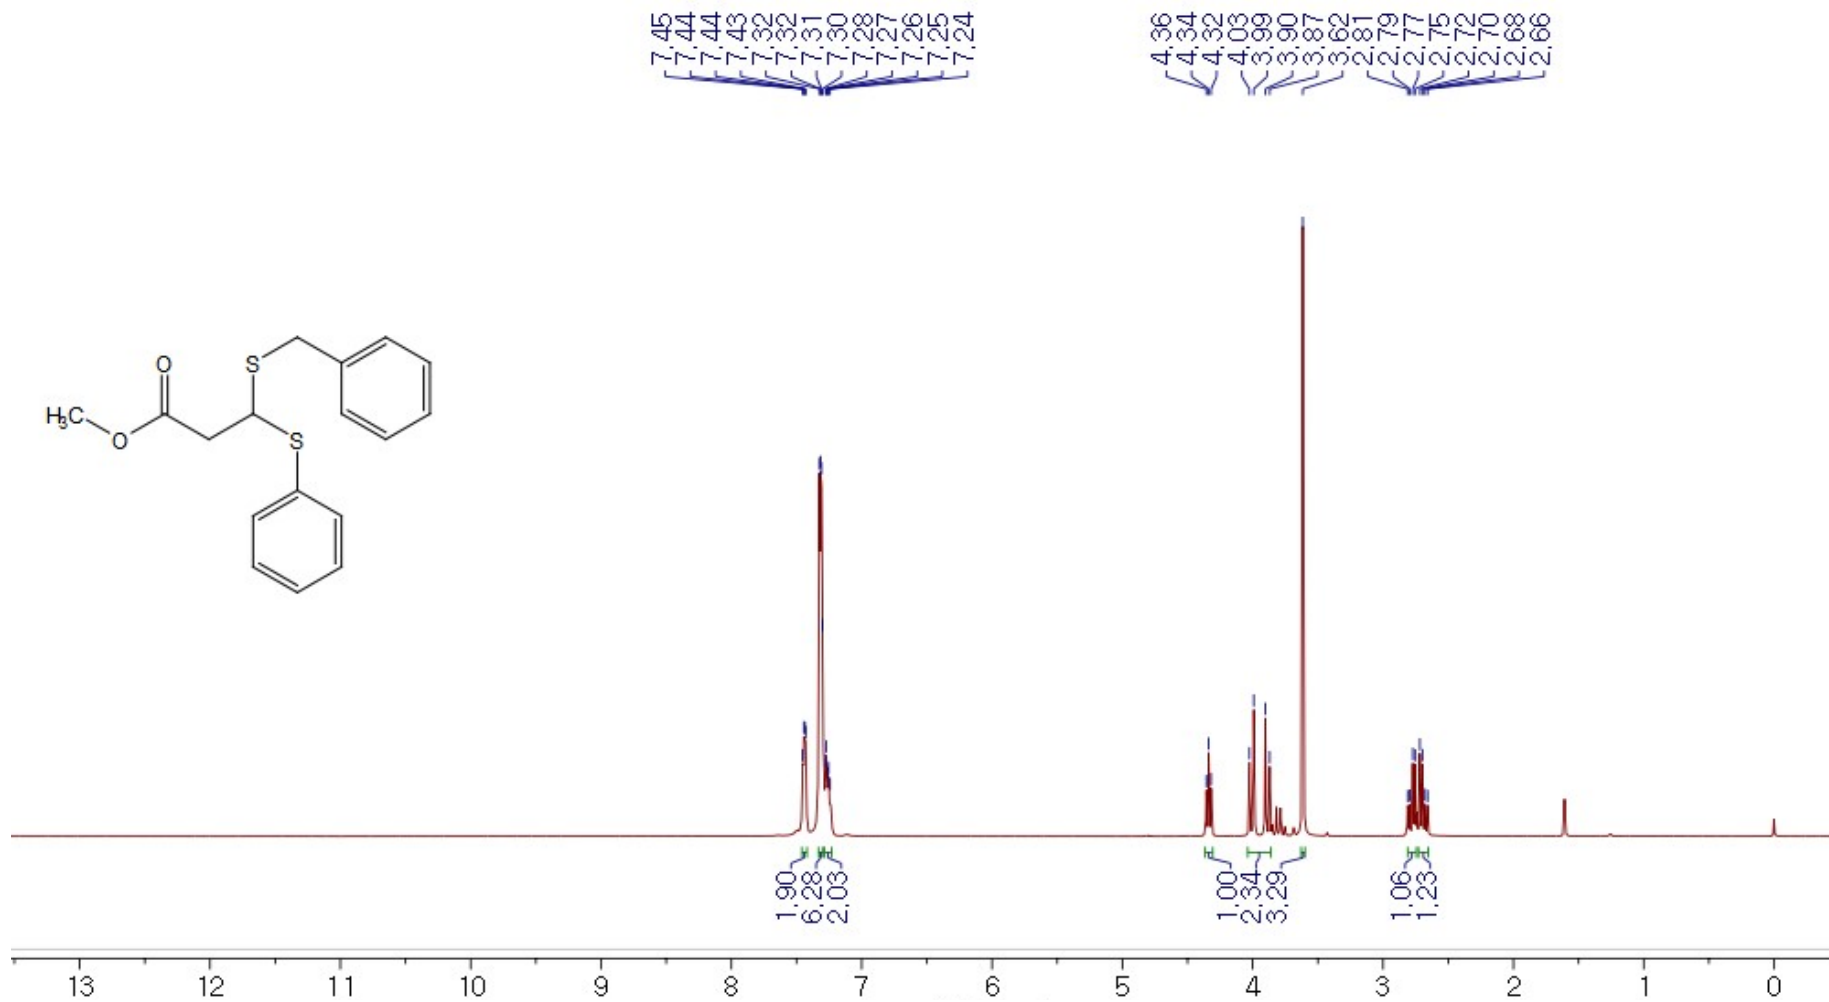

<sup>1</sup>H NMR (400 MHz, CDCl<sub>3</sub>) spectra of Methyl 3-(benzylthio)-3-(phenylthio)propanoate (**3da**)

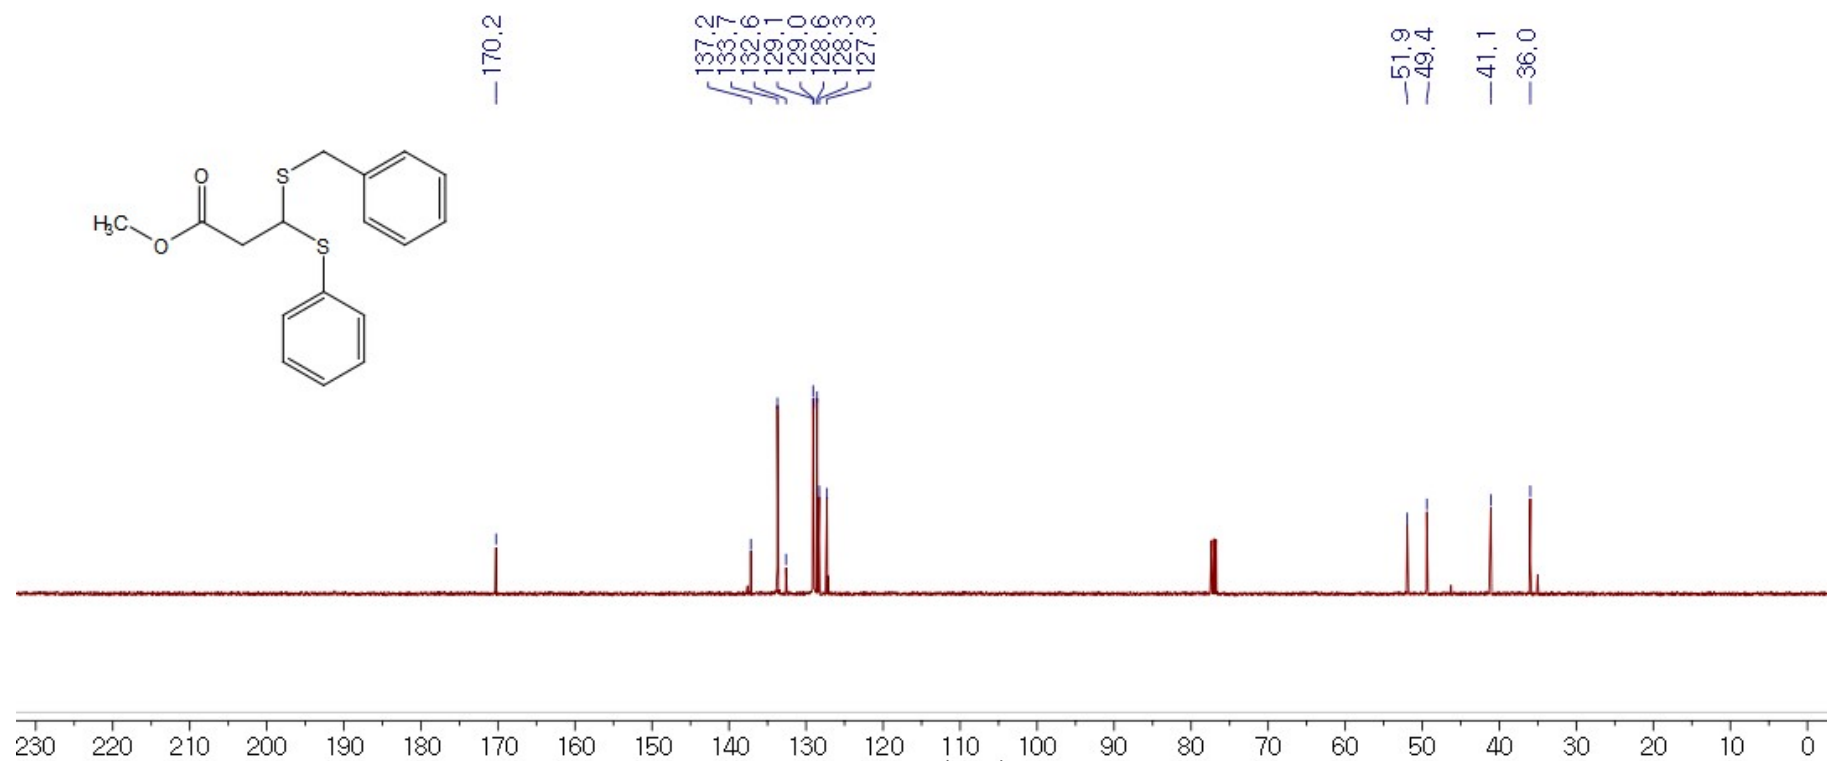

<sup>13</sup>C NMR (100 MHz, CDCl<sub>3</sub>) spectra of Methyl 3-(benzylthio)-3-(phenylthio)propanoate (**3da**)



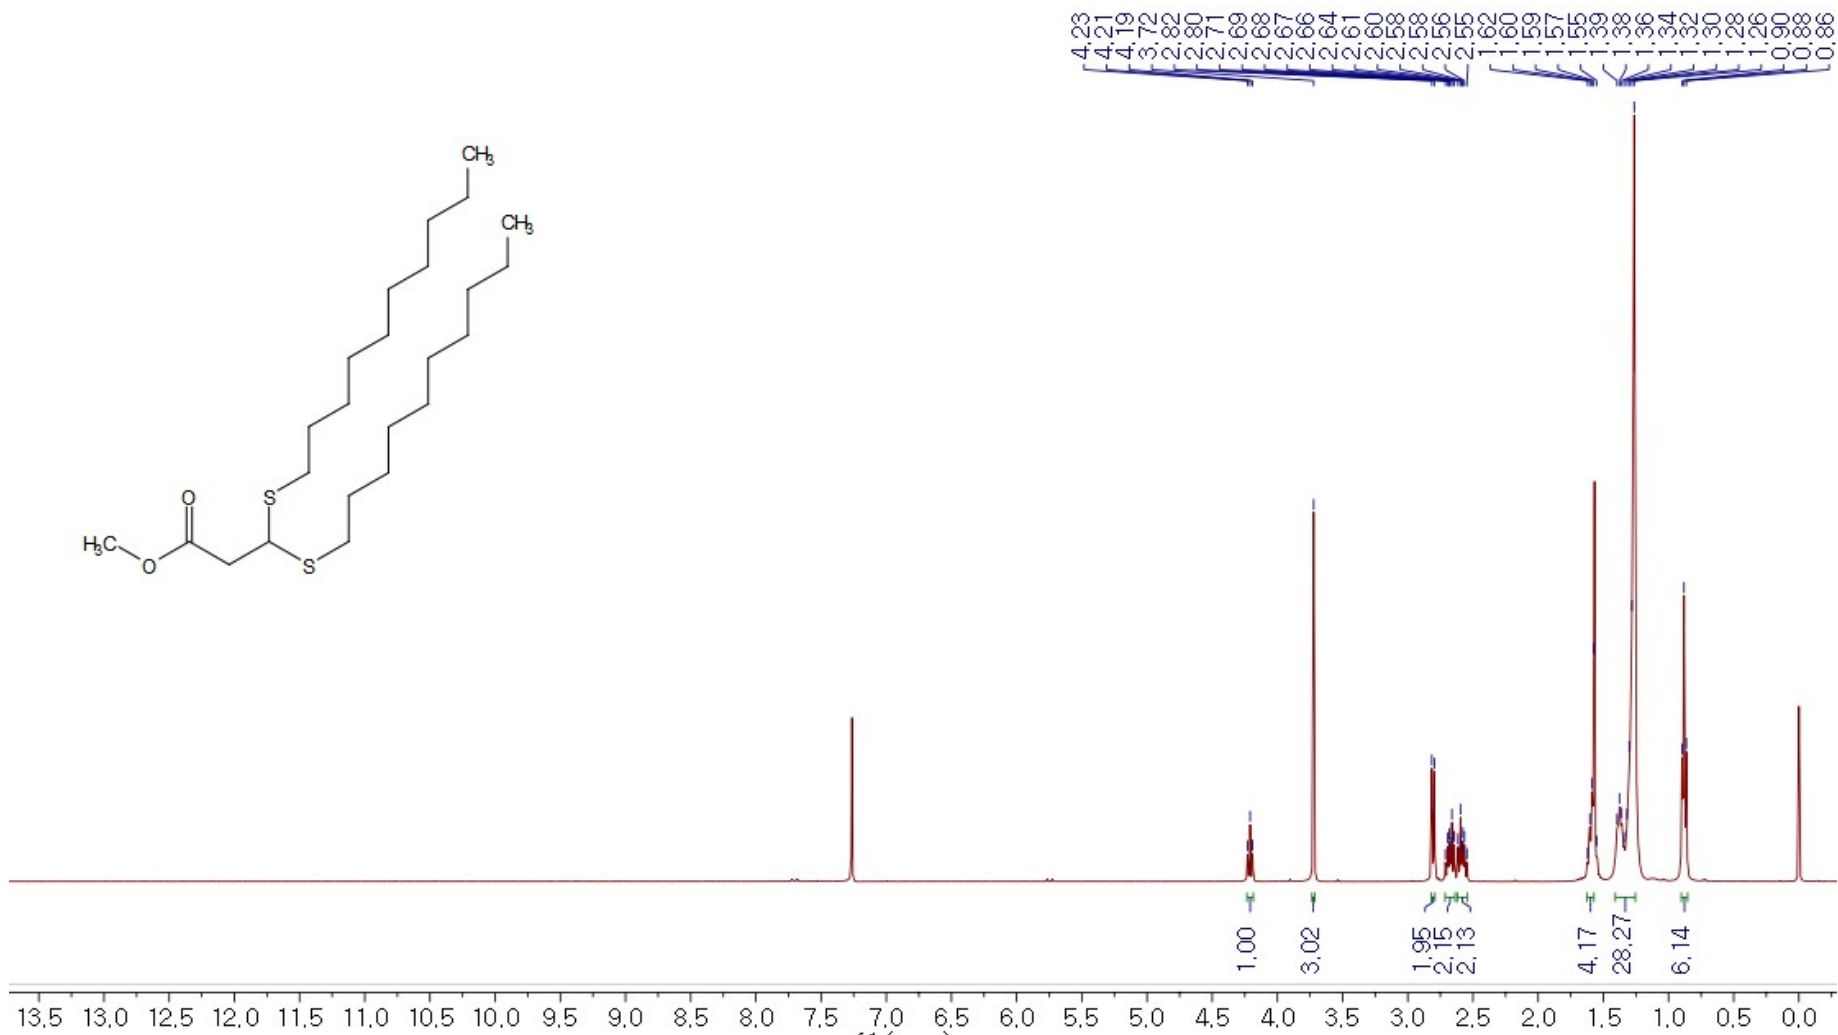

<sup>1</sup>H NMR (400 MHz, CDCl<sub>3</sub>) spectra of Methyl 3,3-bis(decylthio)propanoate (**3ak**)

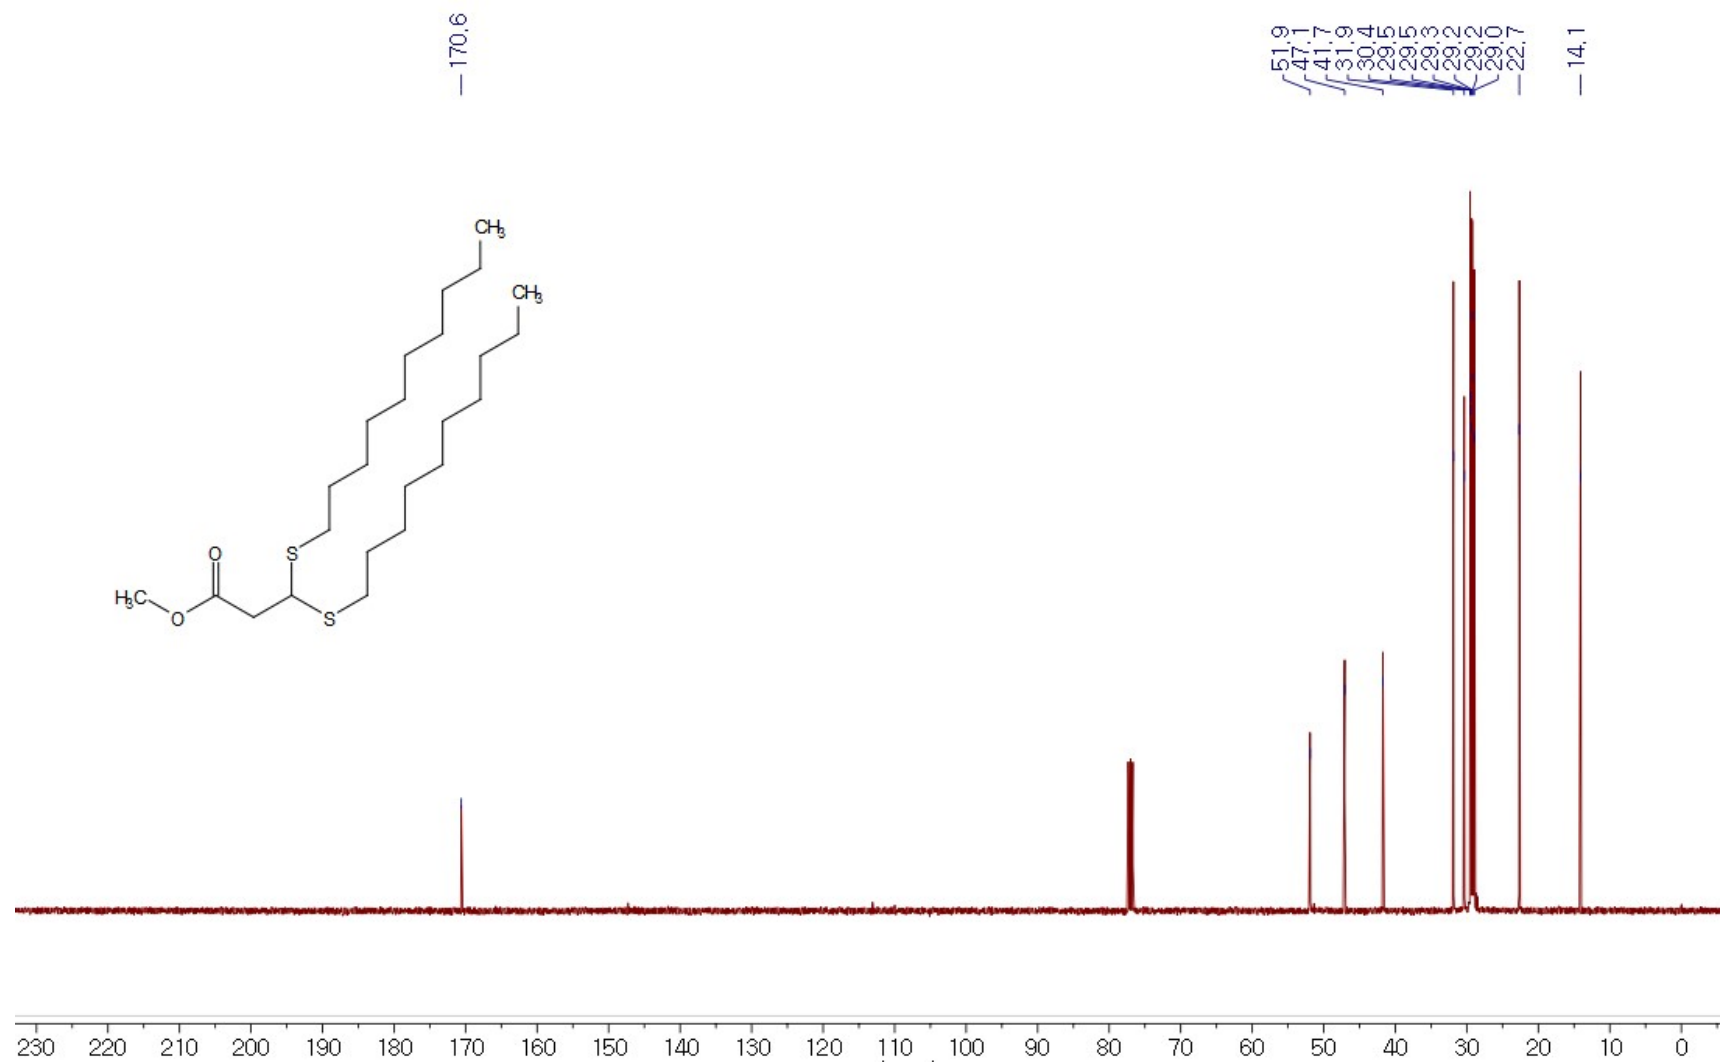

$^{13}\text{C}$  NMR (100 MHz,  $\text{CDCl}_3$ ) spectra of Methyl 3,3-bis(decylthio)propanoate (**3ak**)

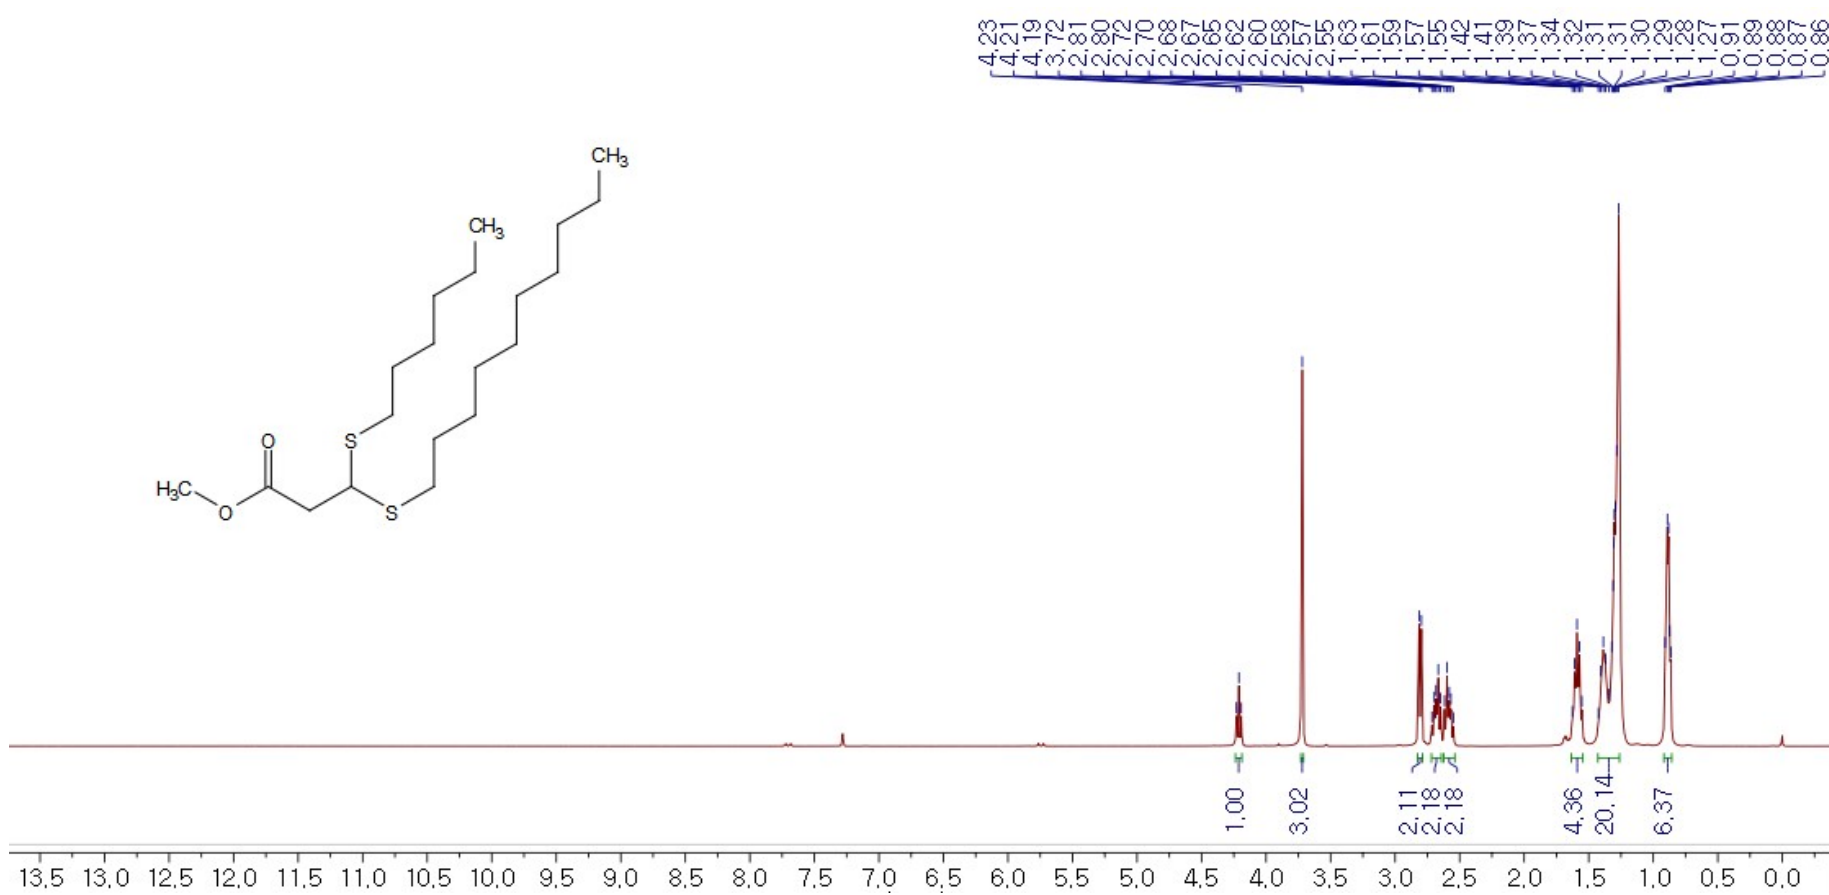

$^1\text{H}$  NMR (400 MHz,  $\text{CDCl}_3$ ) spectra of Methyl 3-(cyclohexylthio)-3-(decylthio)propanoate (3aI)

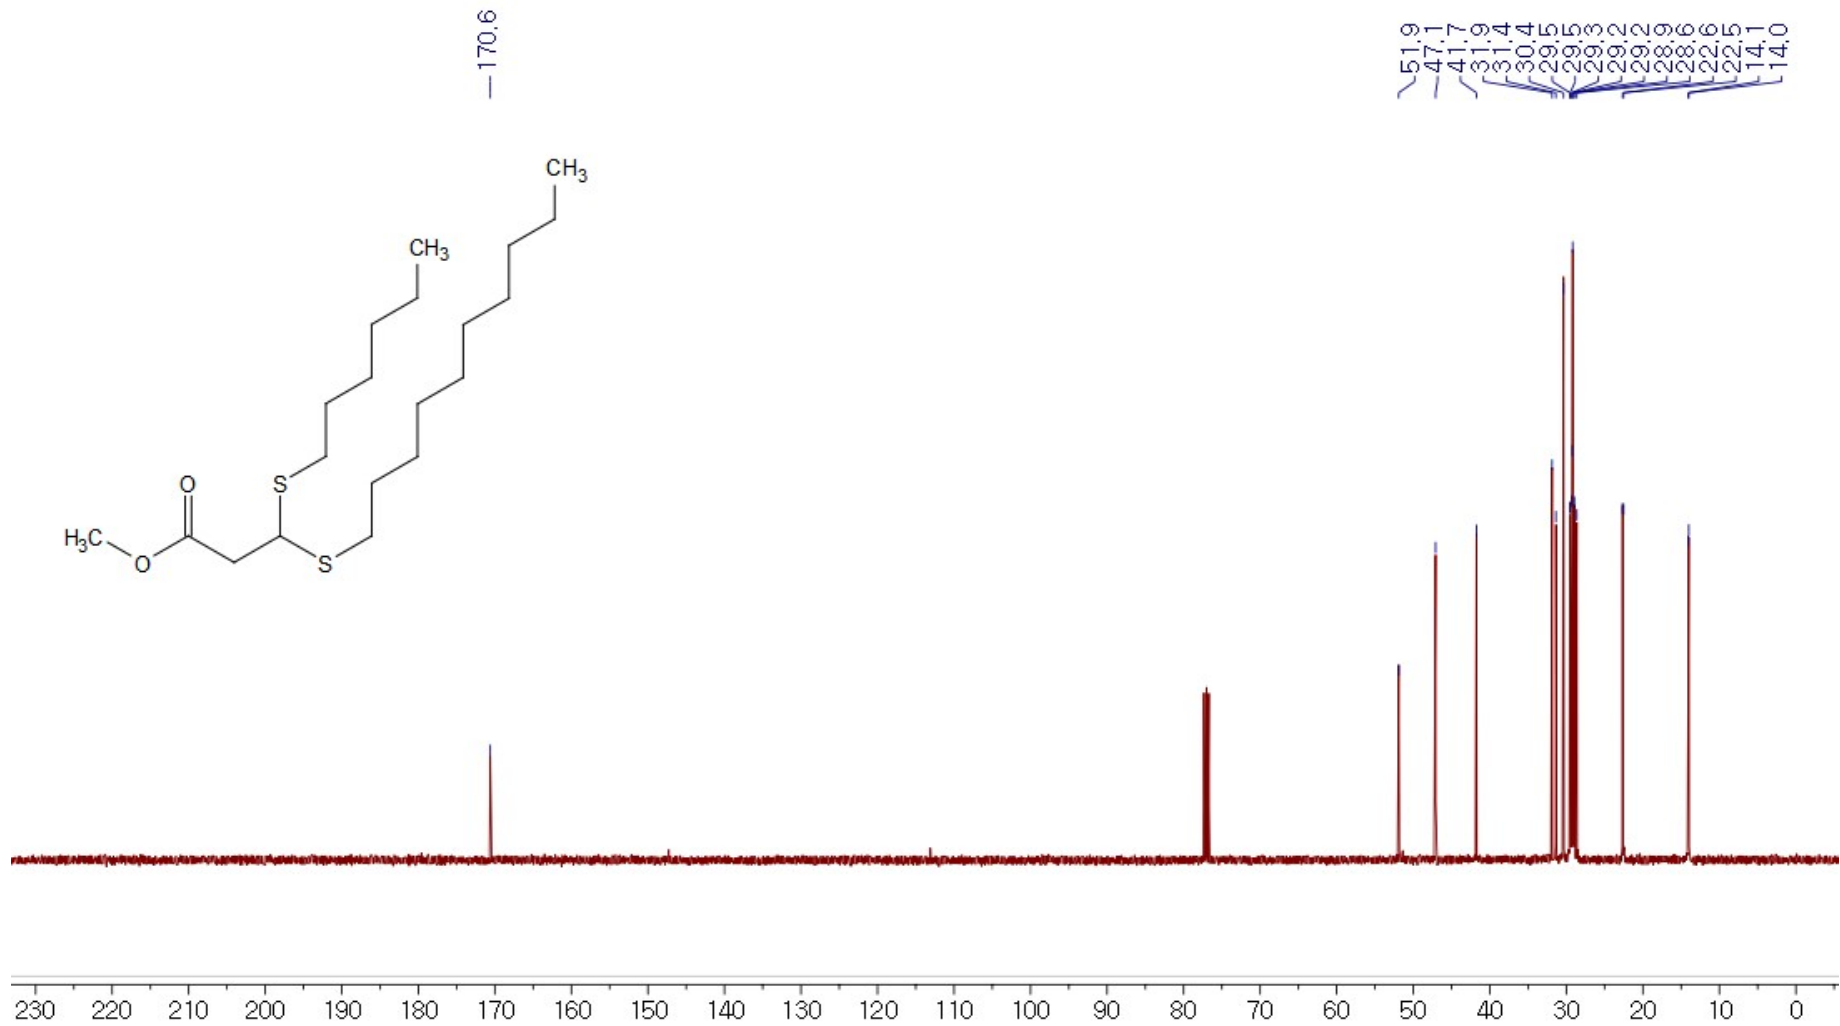

$^{13}\text{C}$  NMR (100 MHz,  $\text{CDCl}_3$ ) spectra of Methyl 3-(cyclohexylthio)-3-(decylthio)propanoate (**3al**)

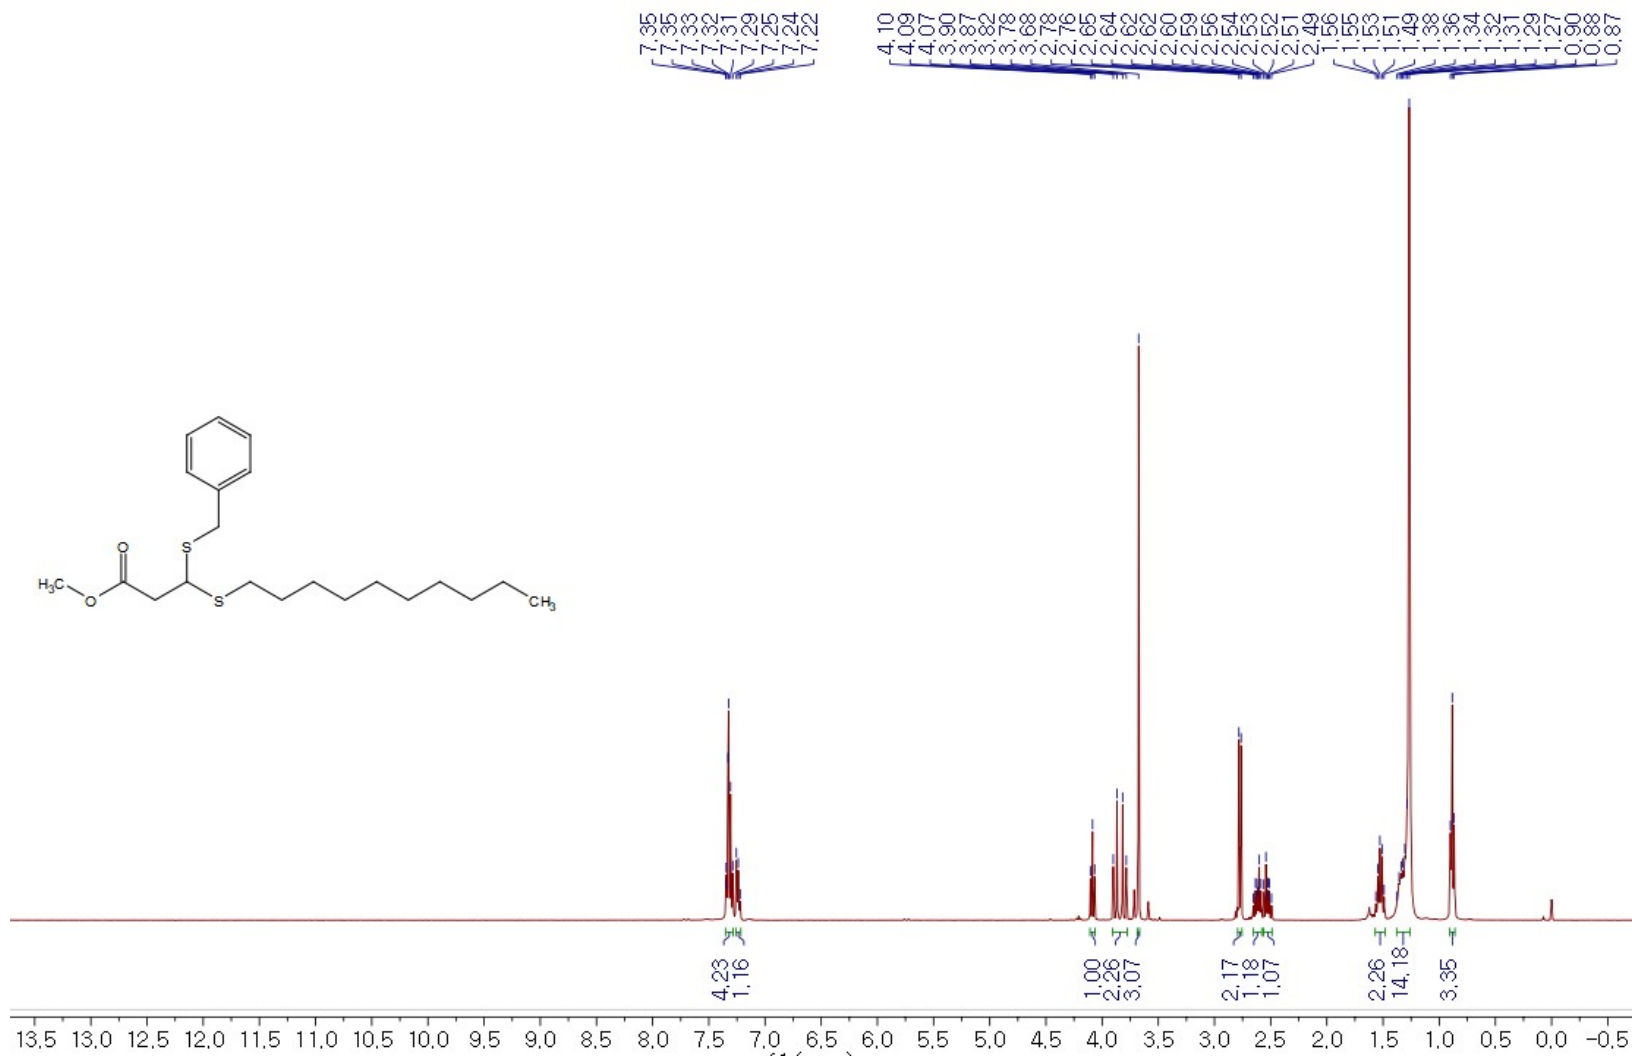

<sup>1</sup>H NMR (400 MHz, CDCl<sub>3</sub>) spectra of Methyl 3-(benzylthio)-3-(decylthio)propanoate (**3am**)

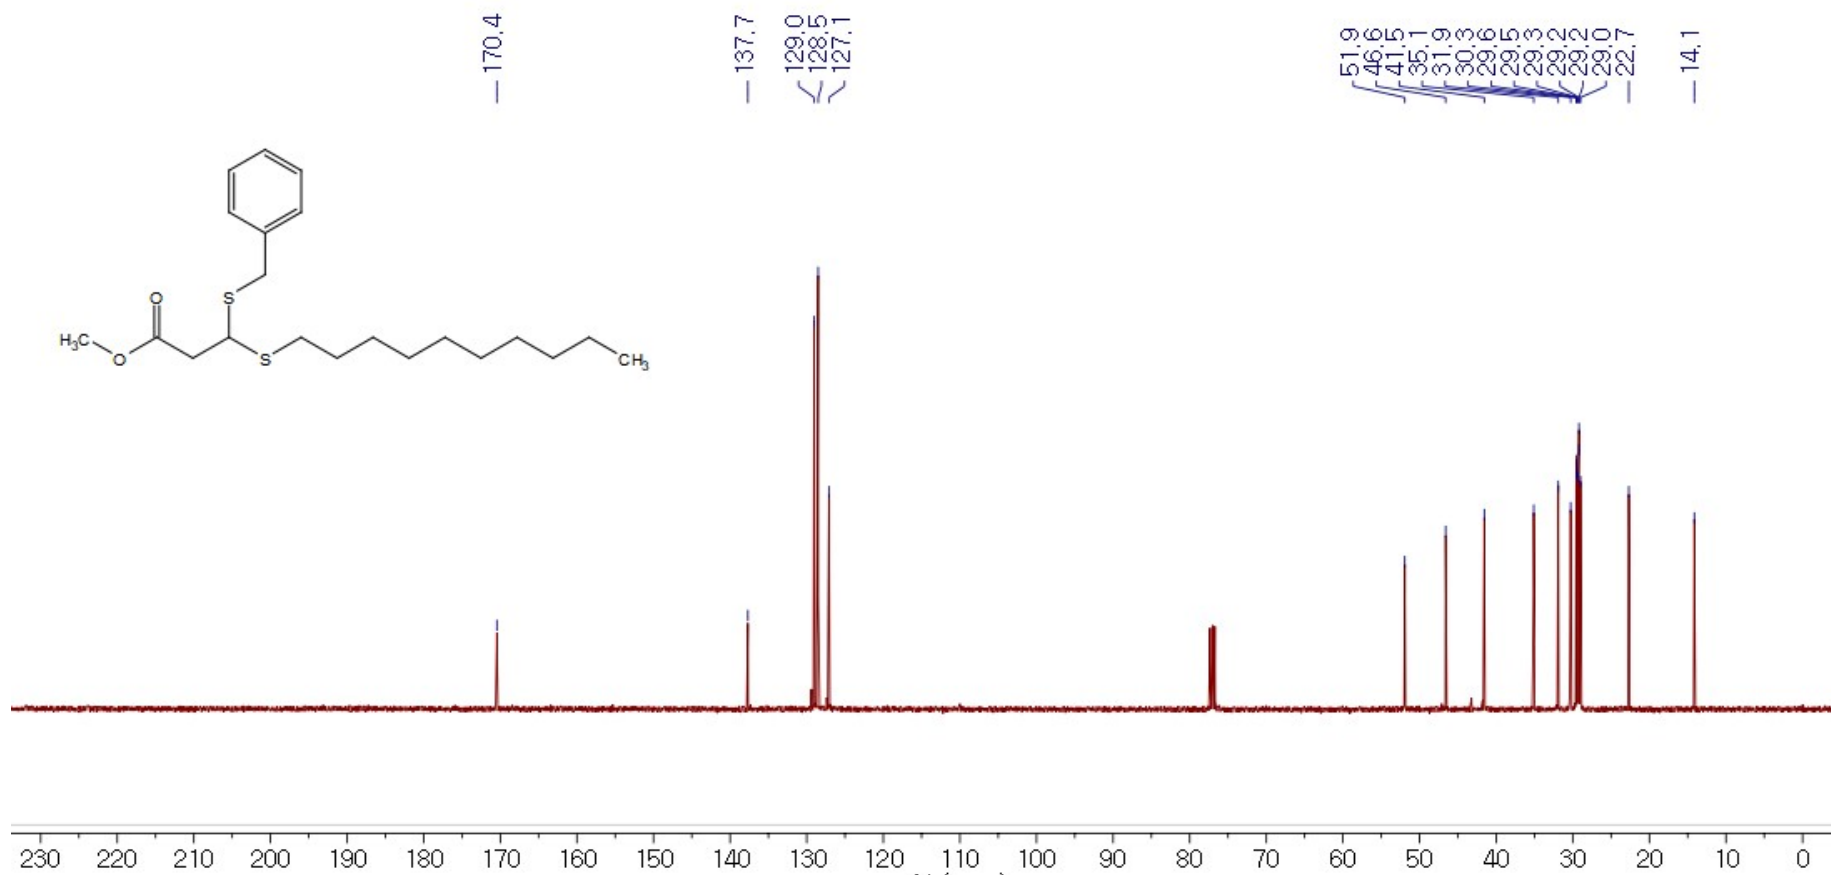

<sup>13</sup>C NMR (100 MHz, CDCl<sub>3</sub>) spectra of Methyl 3-(benzylthio)-3-(decylthio)propanoate (**3am**)

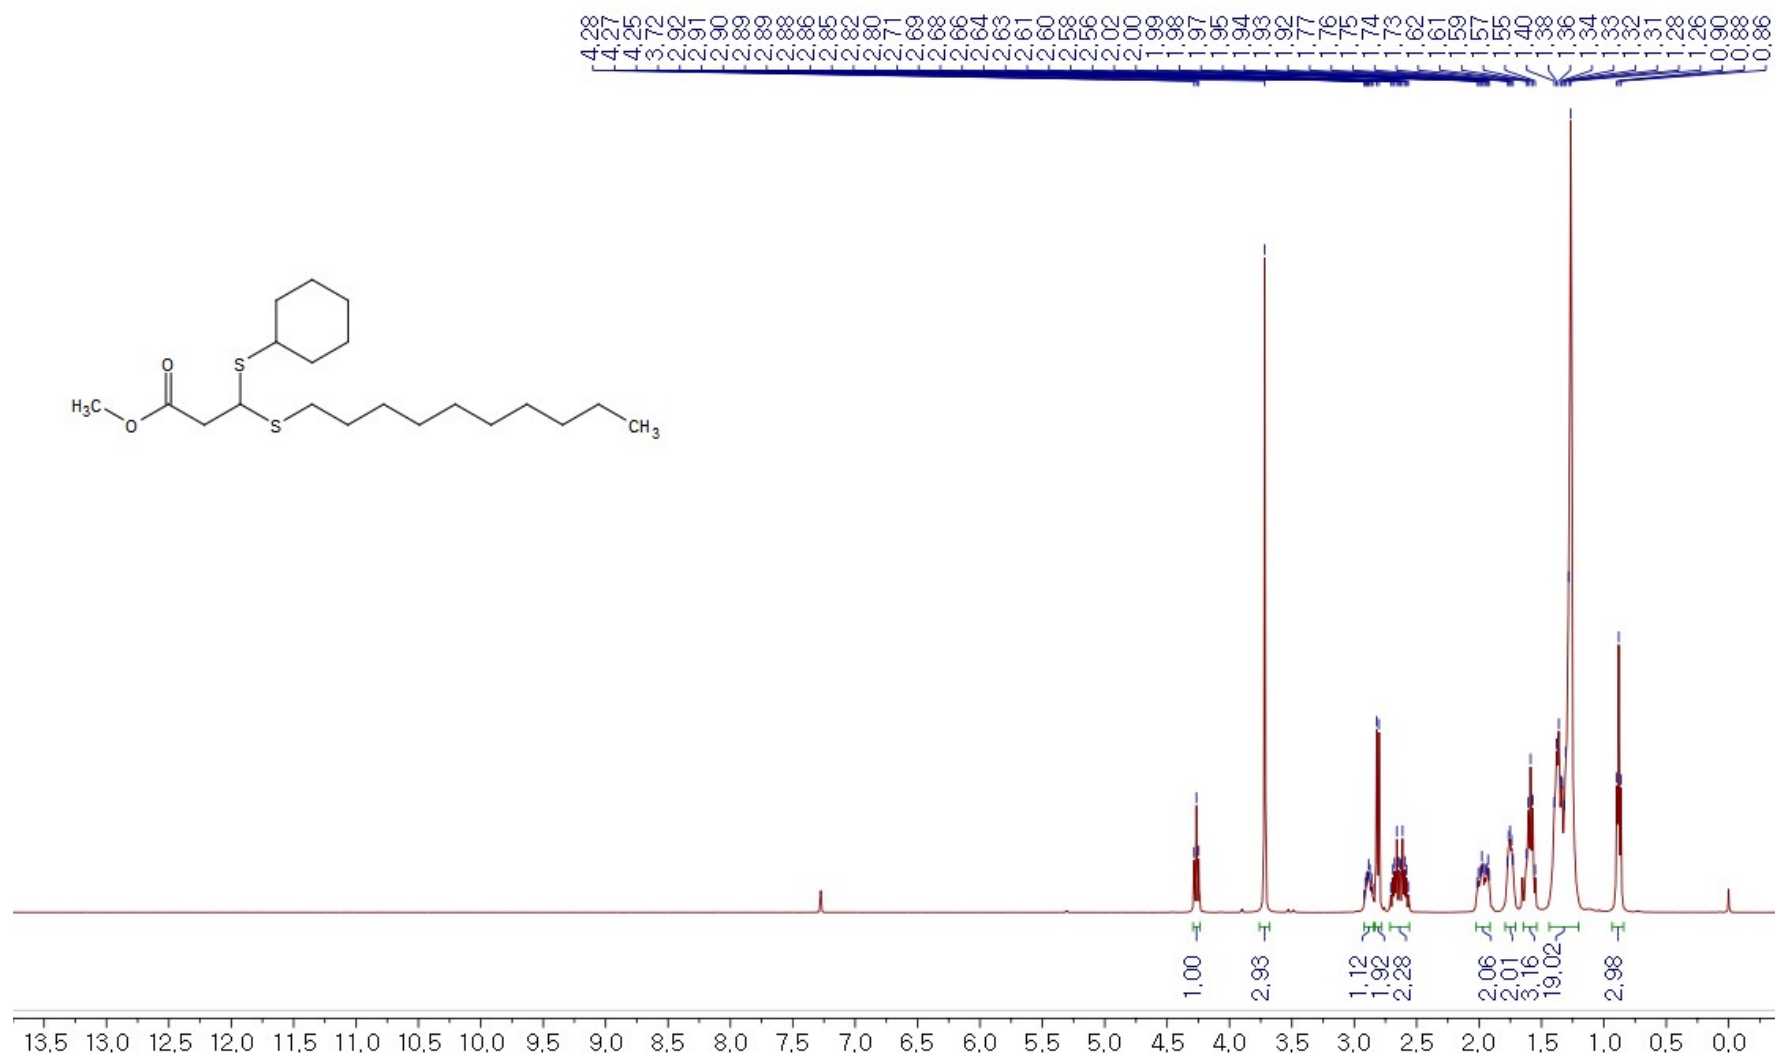

<sup>1</sup>H NMR (400 MHz, CDCl<sub>3</sub>) spectra of Methyl 3-(cyclohexylthio)-3-(decylthio)propanoate (**3an**)

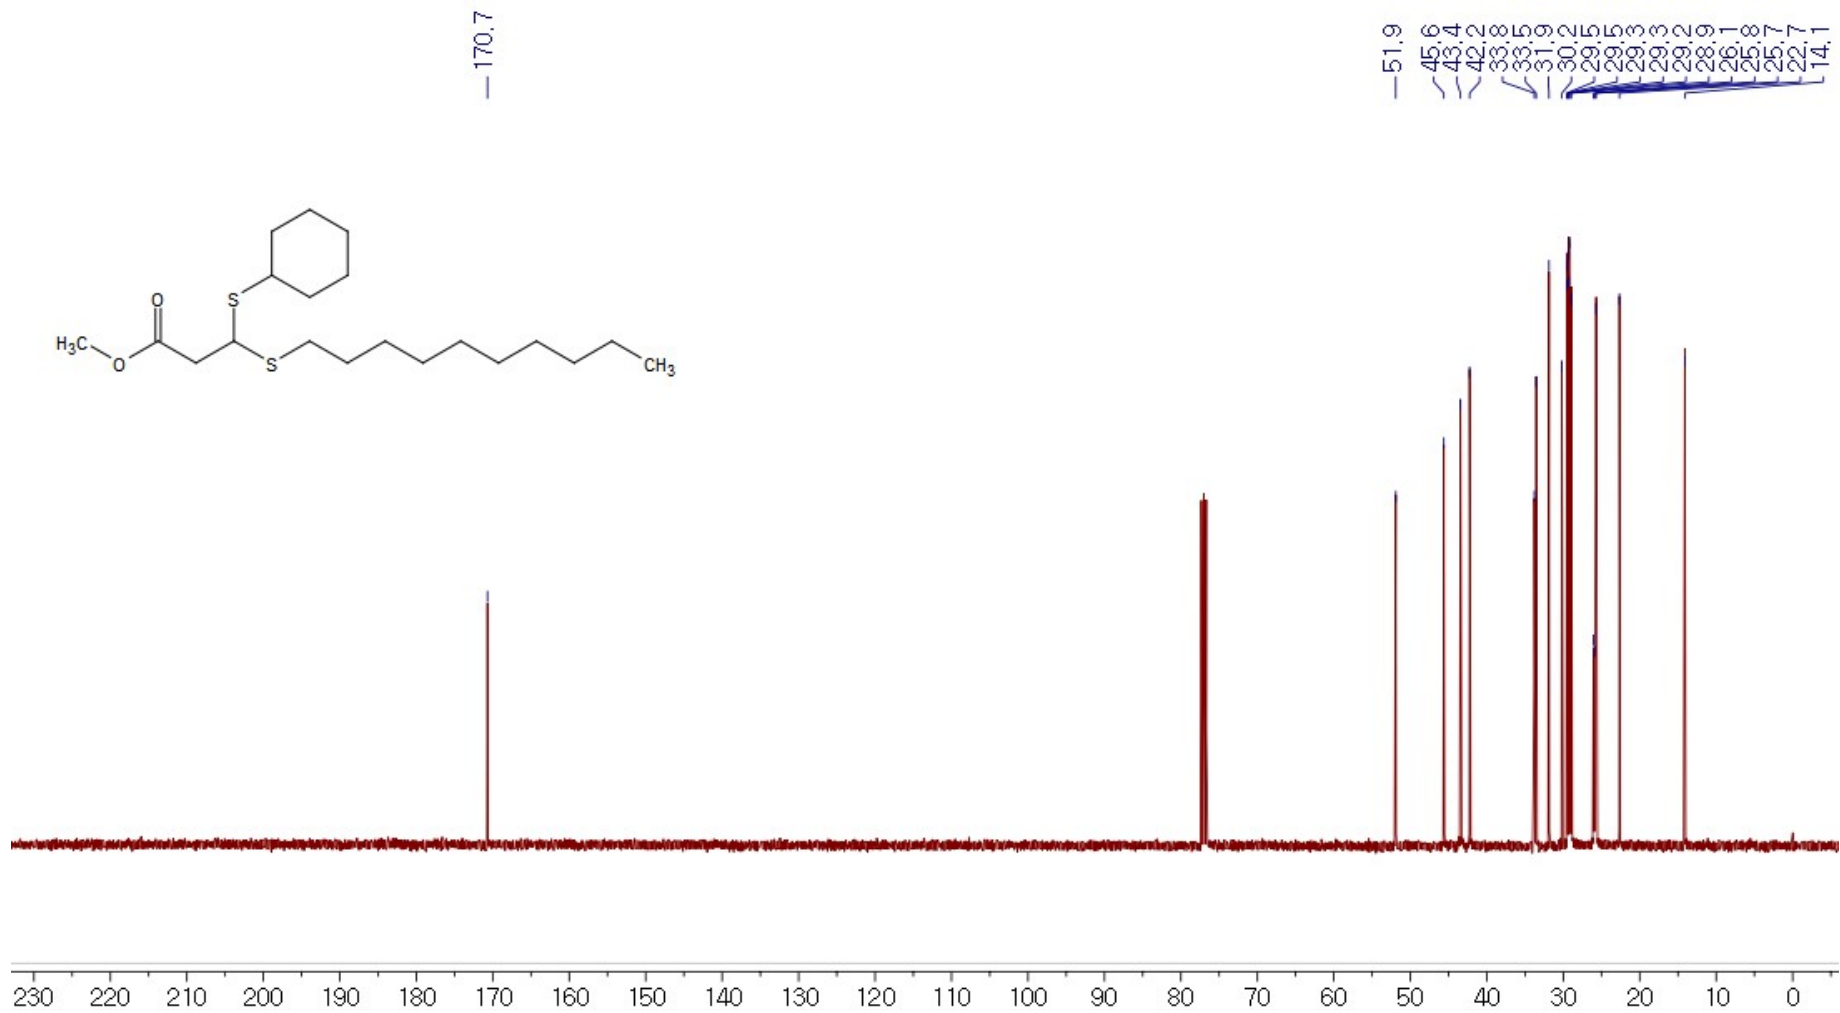

$^{13}\text{C}$  NMR (100 MHz,  $\text{CDCl}_3$ ) spectra of Methyl 3-(cyclohexylthio)-3-(decylthio)propanoate (**3an**)



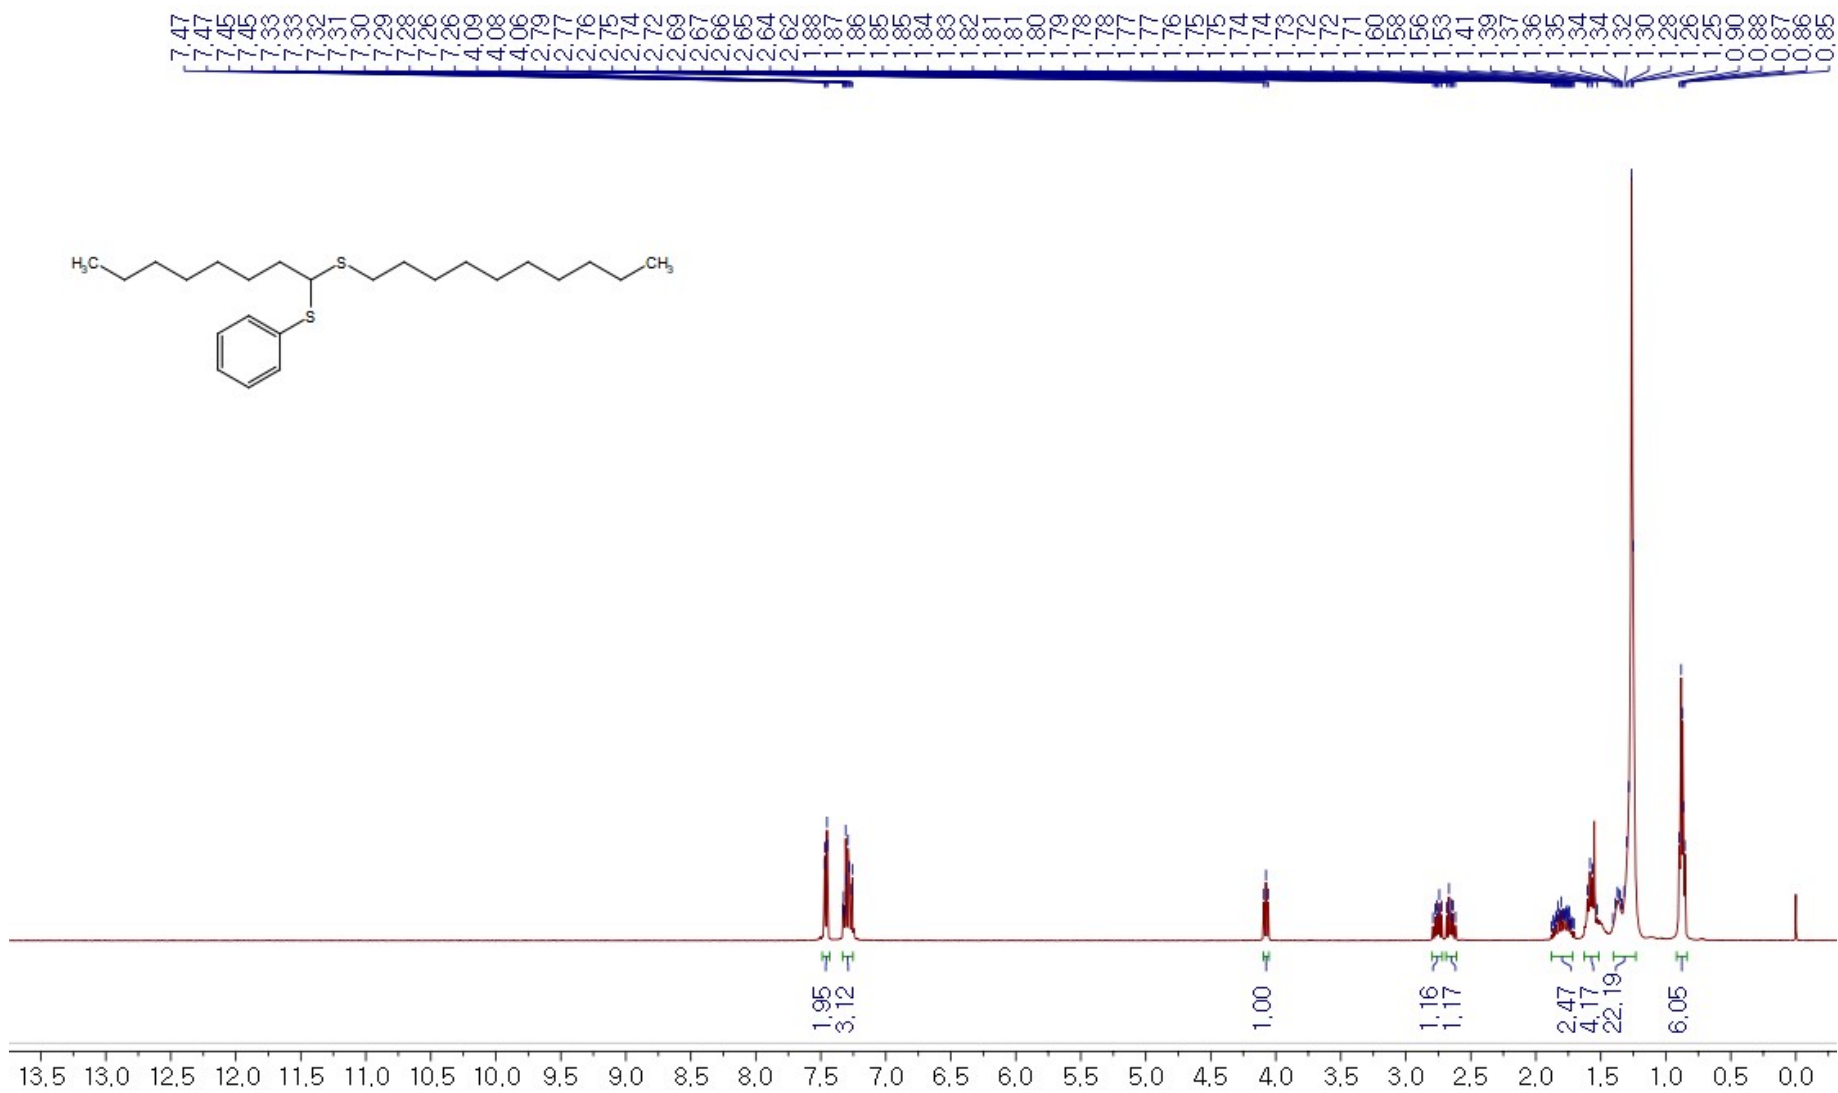

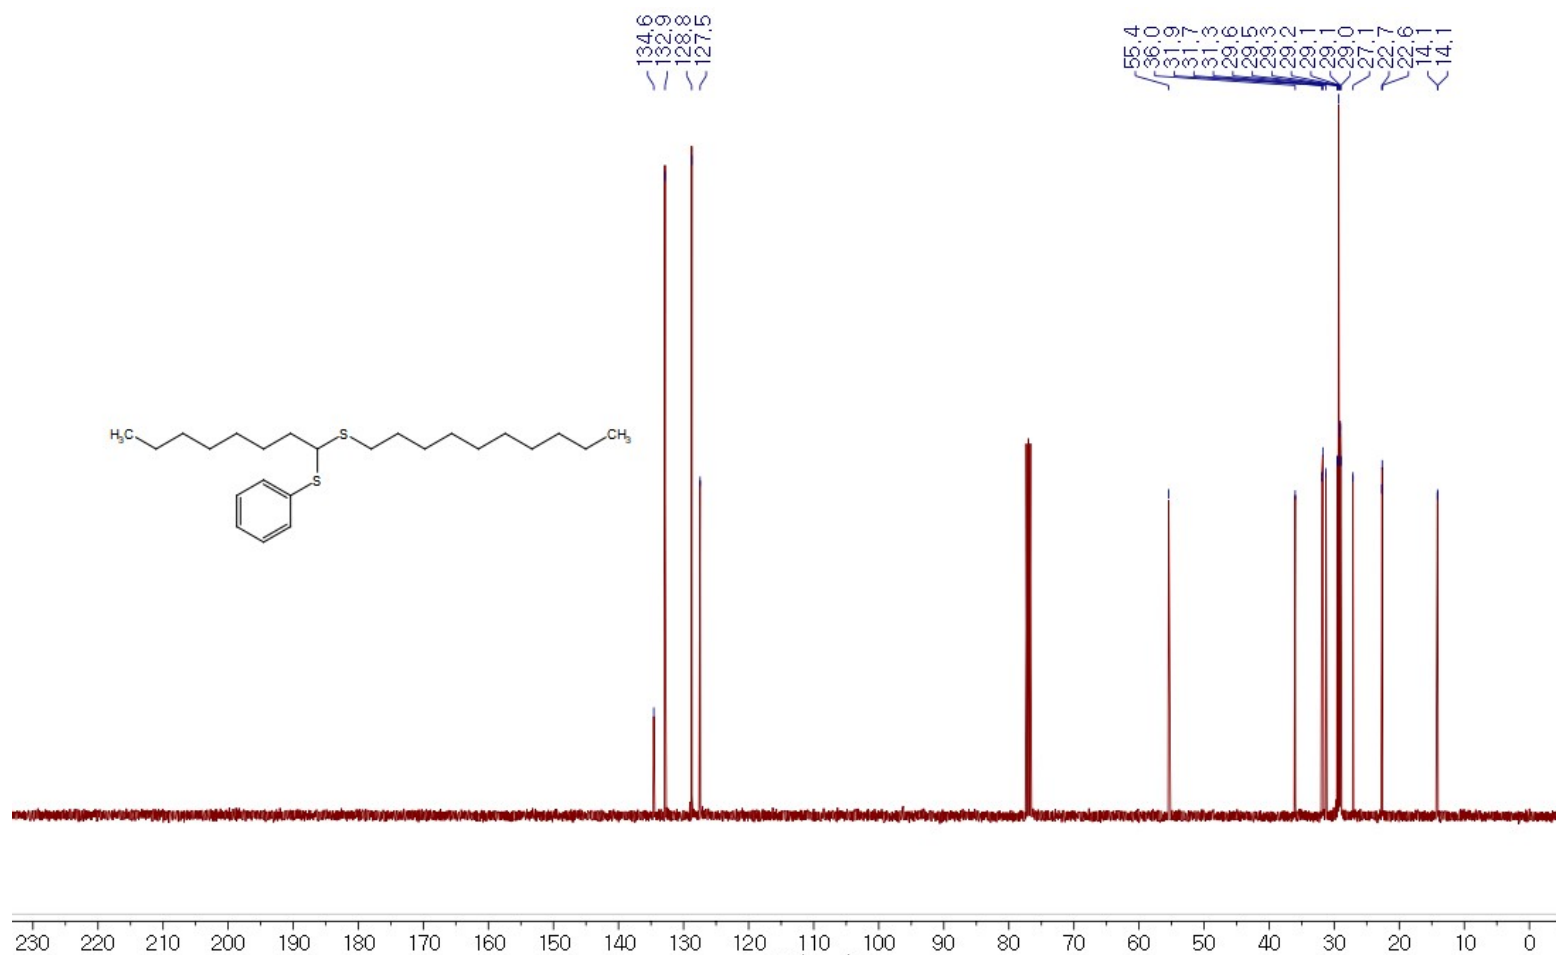

<sup>13</sup>C NMR (100 MHz, CDCl<sub>3</sub>) spectra of Decyl(1-(phenylthio)octyl)sulfane (**3ea**)

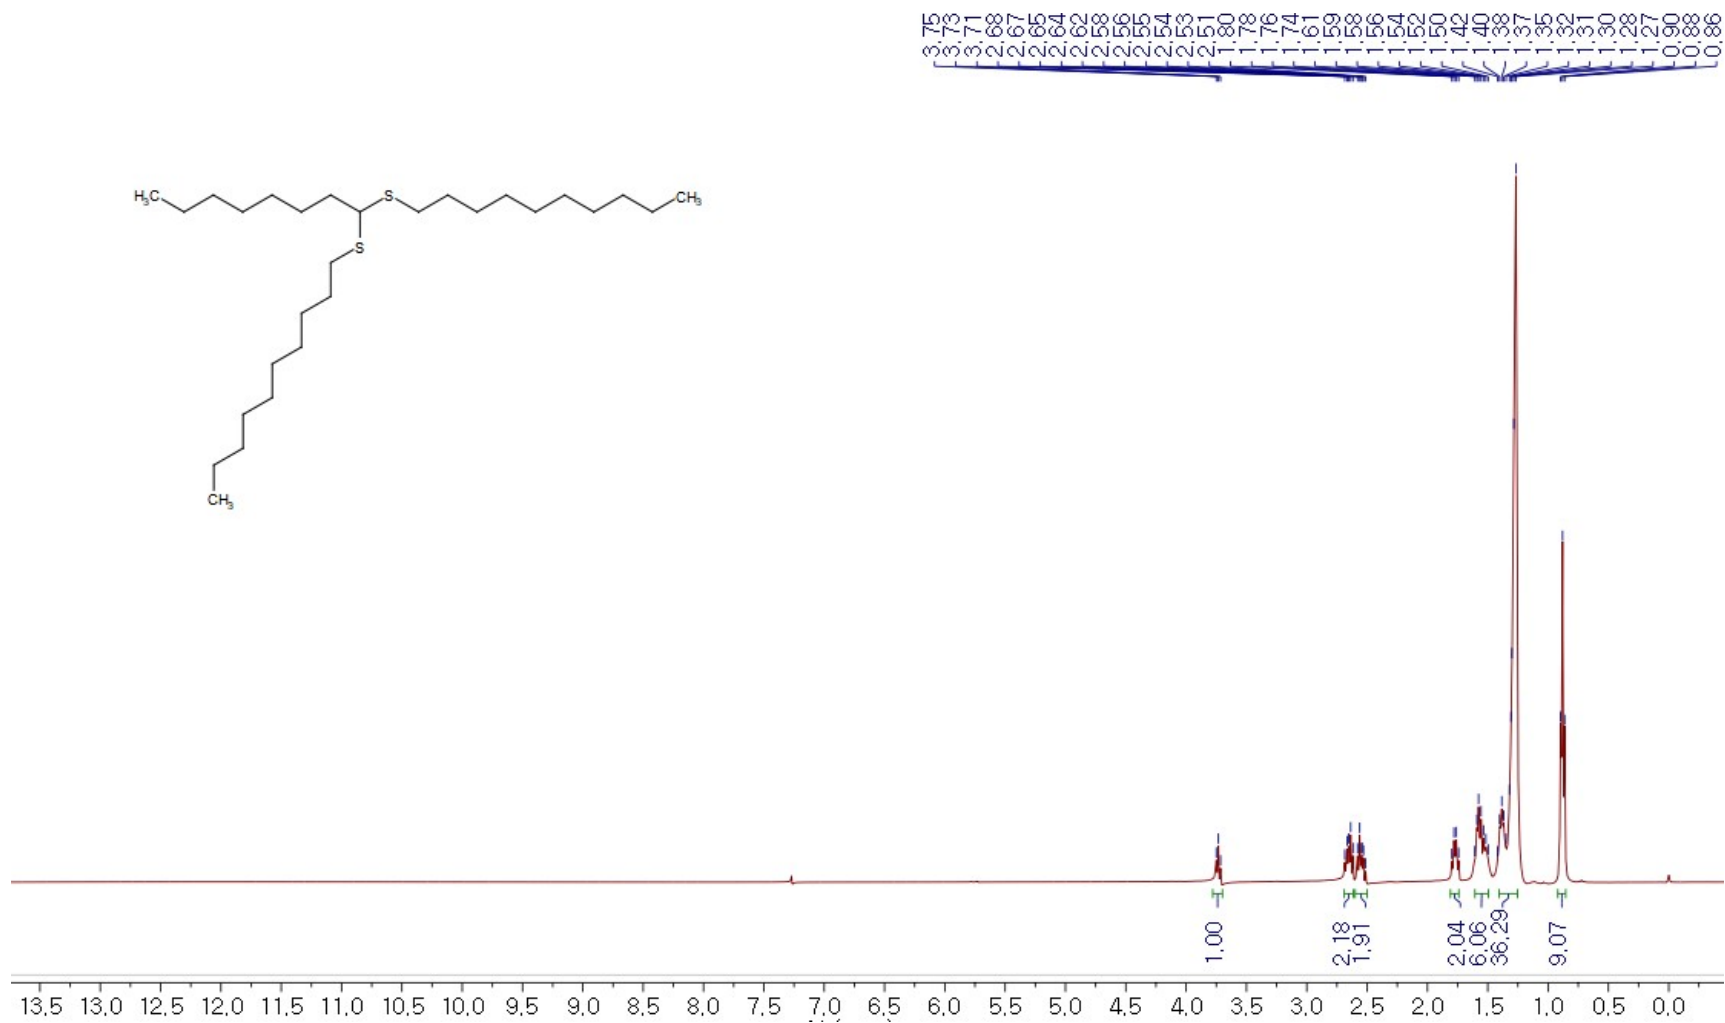

$^1\text{H}$  NMR (400 MHz,  $\text{CDCl}_3$ ) spectra of Octane-1,1-diylbis(decylsulfane) (**3ek**)

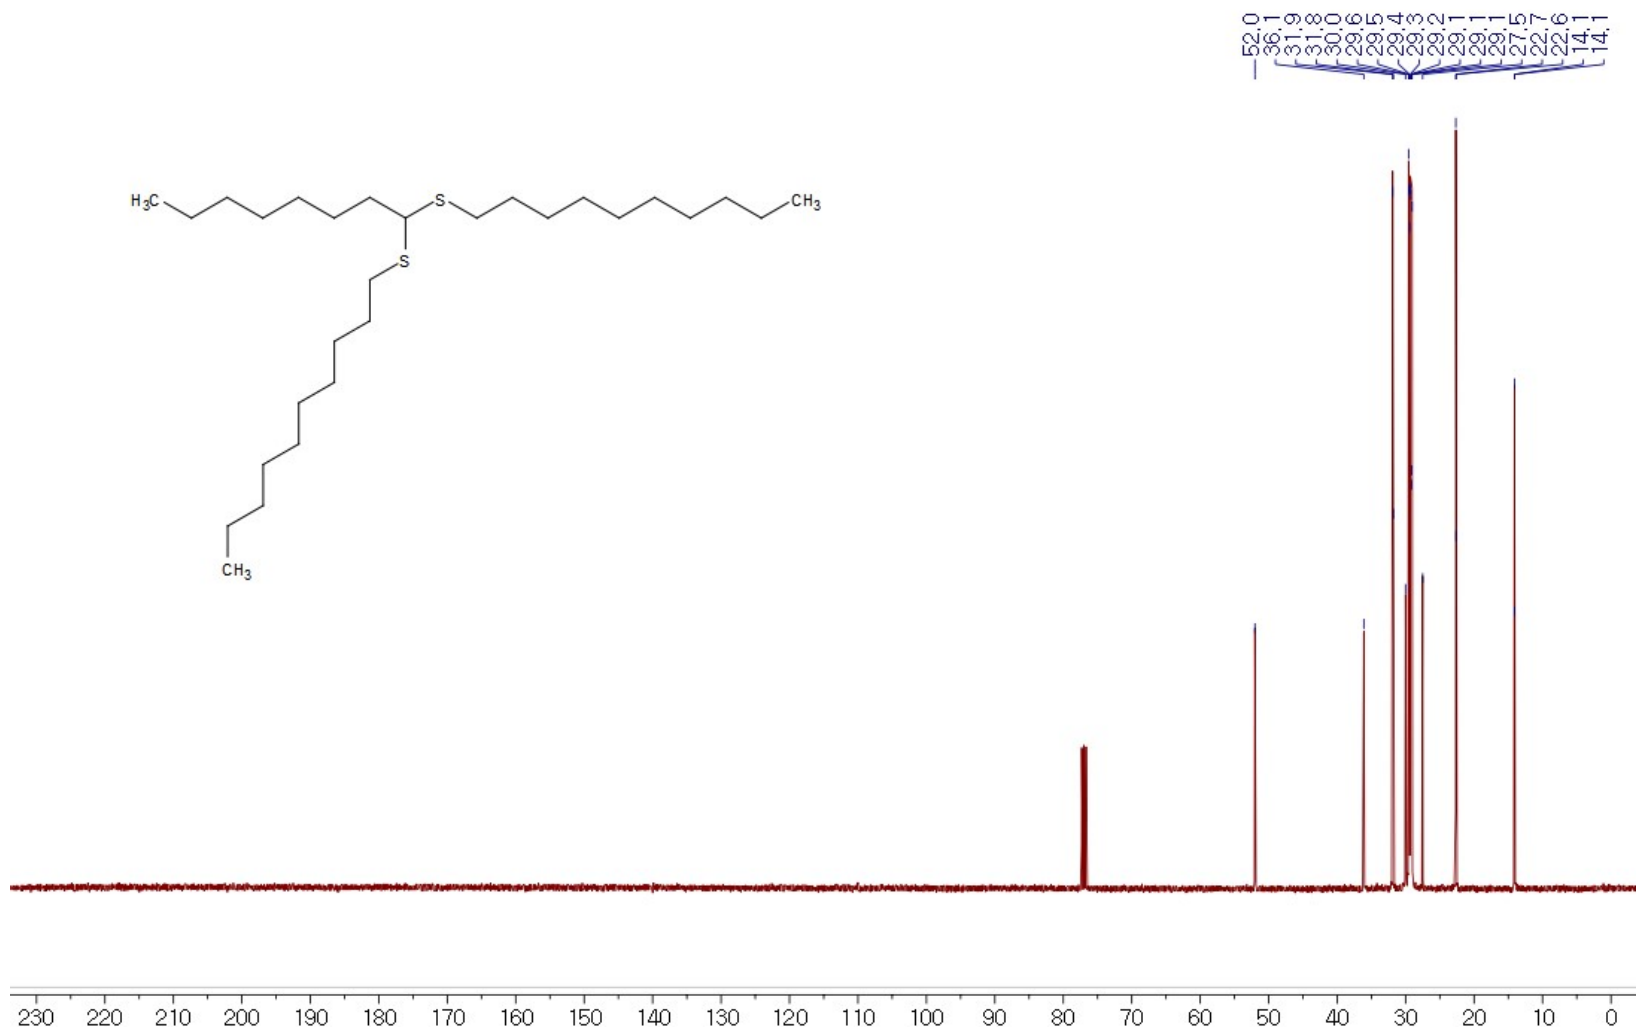

<sup>13</sup>C NMR (100 MHz, CDCl<sub>3</sub>) spectra of Octane-1,1-diylbis(decylsulfane) (**3ek**)

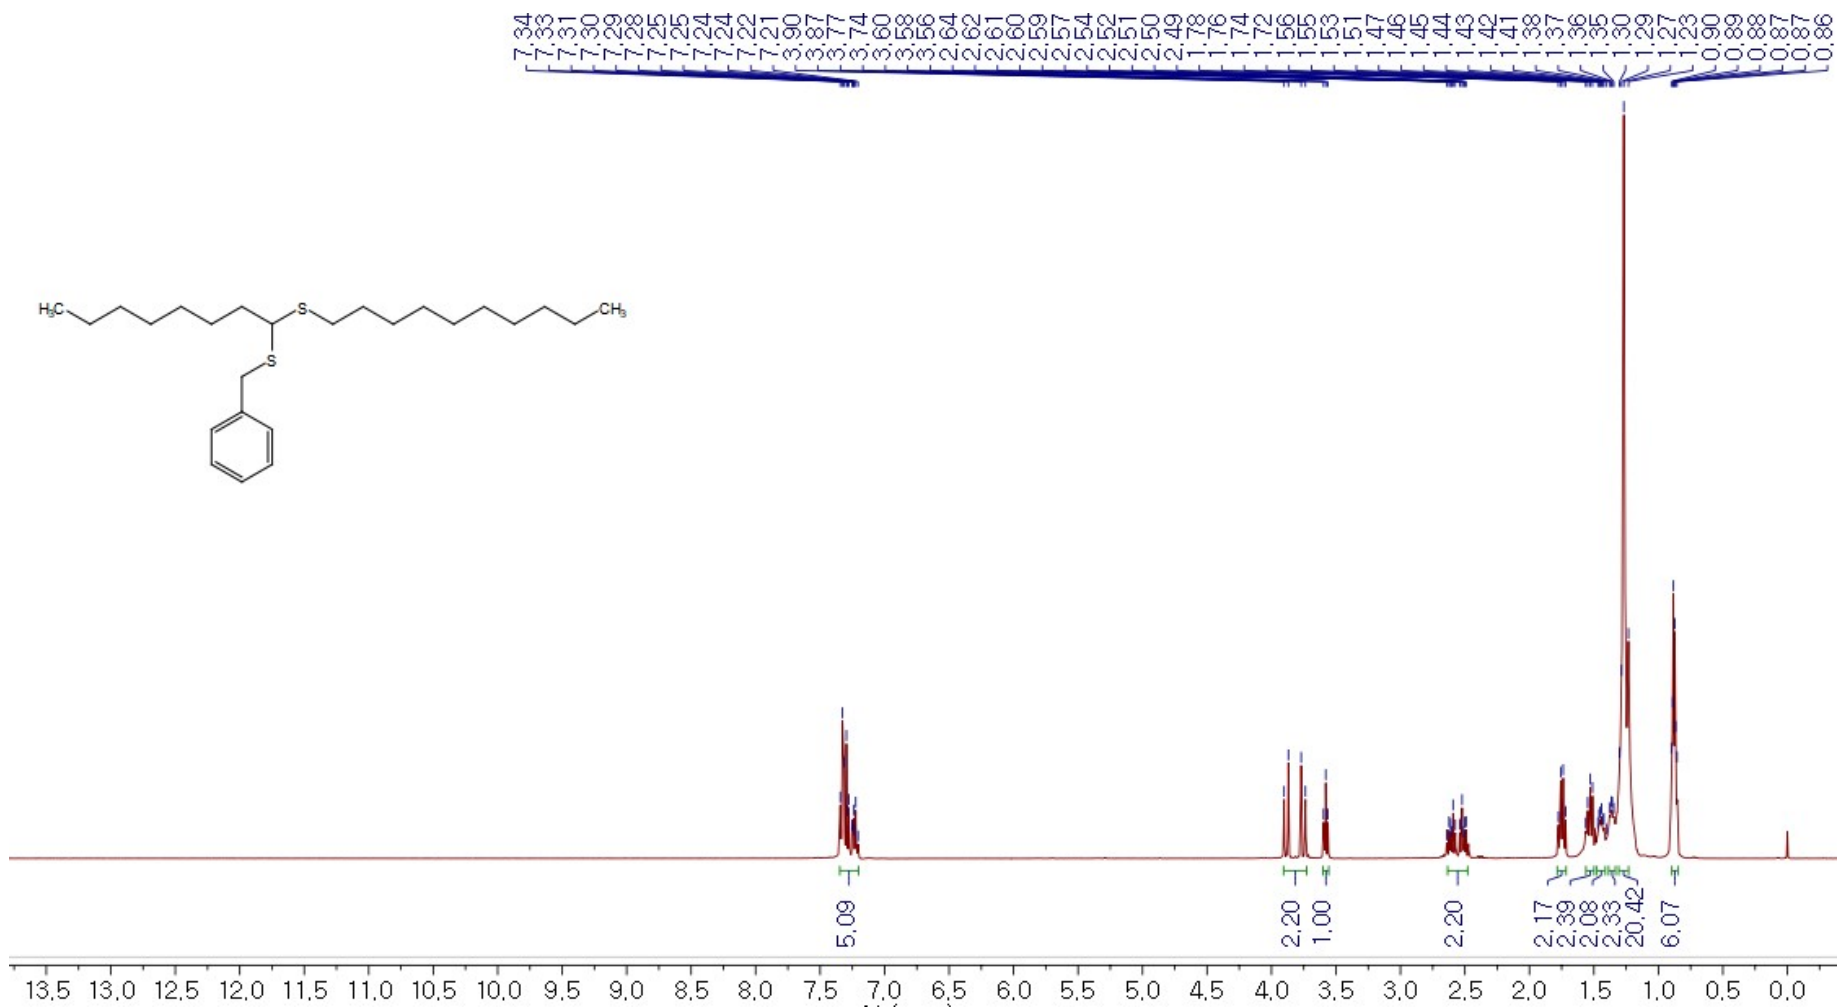

<sup>1</sup>H NMR (400 MHz, CDCl<sub>3</sub>) spectra of Benzyl(1-(decylthio)octyl)sulfane (**3em**)

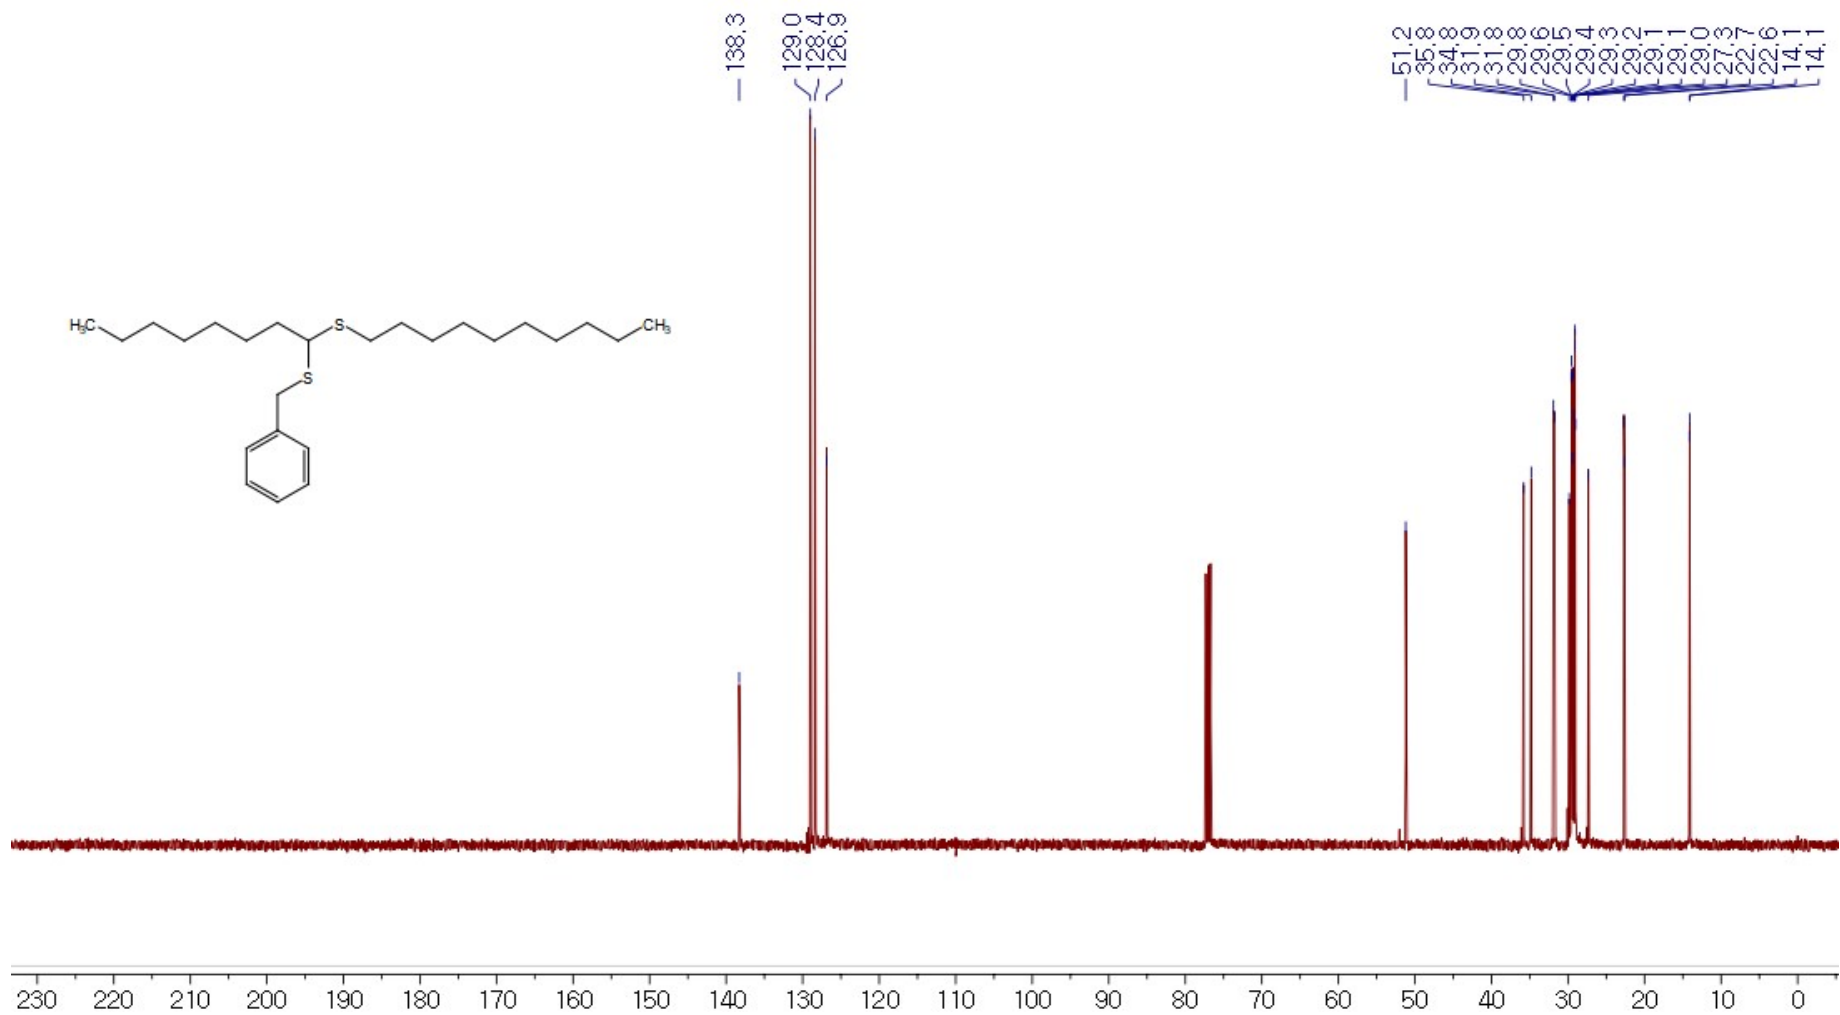

<sup>13</sup>C NMR (100 MHz, CDCl<sub>3</sub>) spectra of Benzyl(1-(decylthio)octyl)sulfane (**3em**)

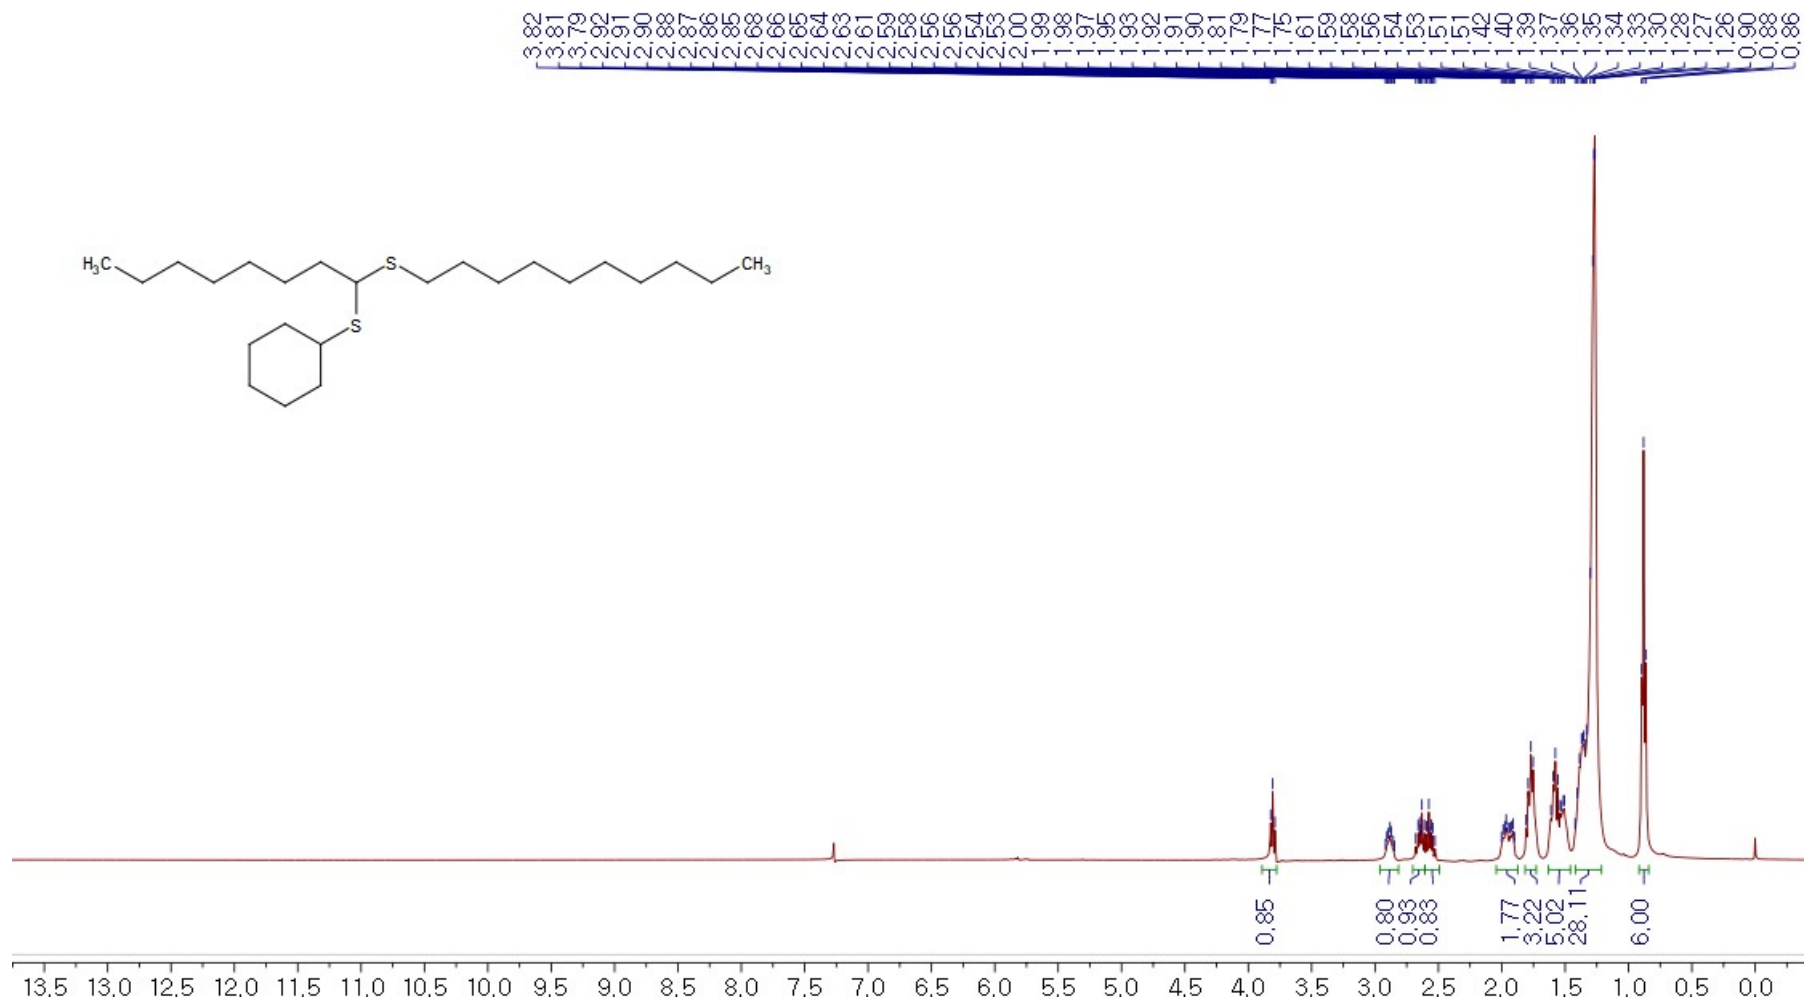

<sup>1</sup>H NMR (400 MHz, CDCl<sub>3</sub>) spectra of Cyclohexyl(1-(decylthio)octyl)sulfane (**3en**)

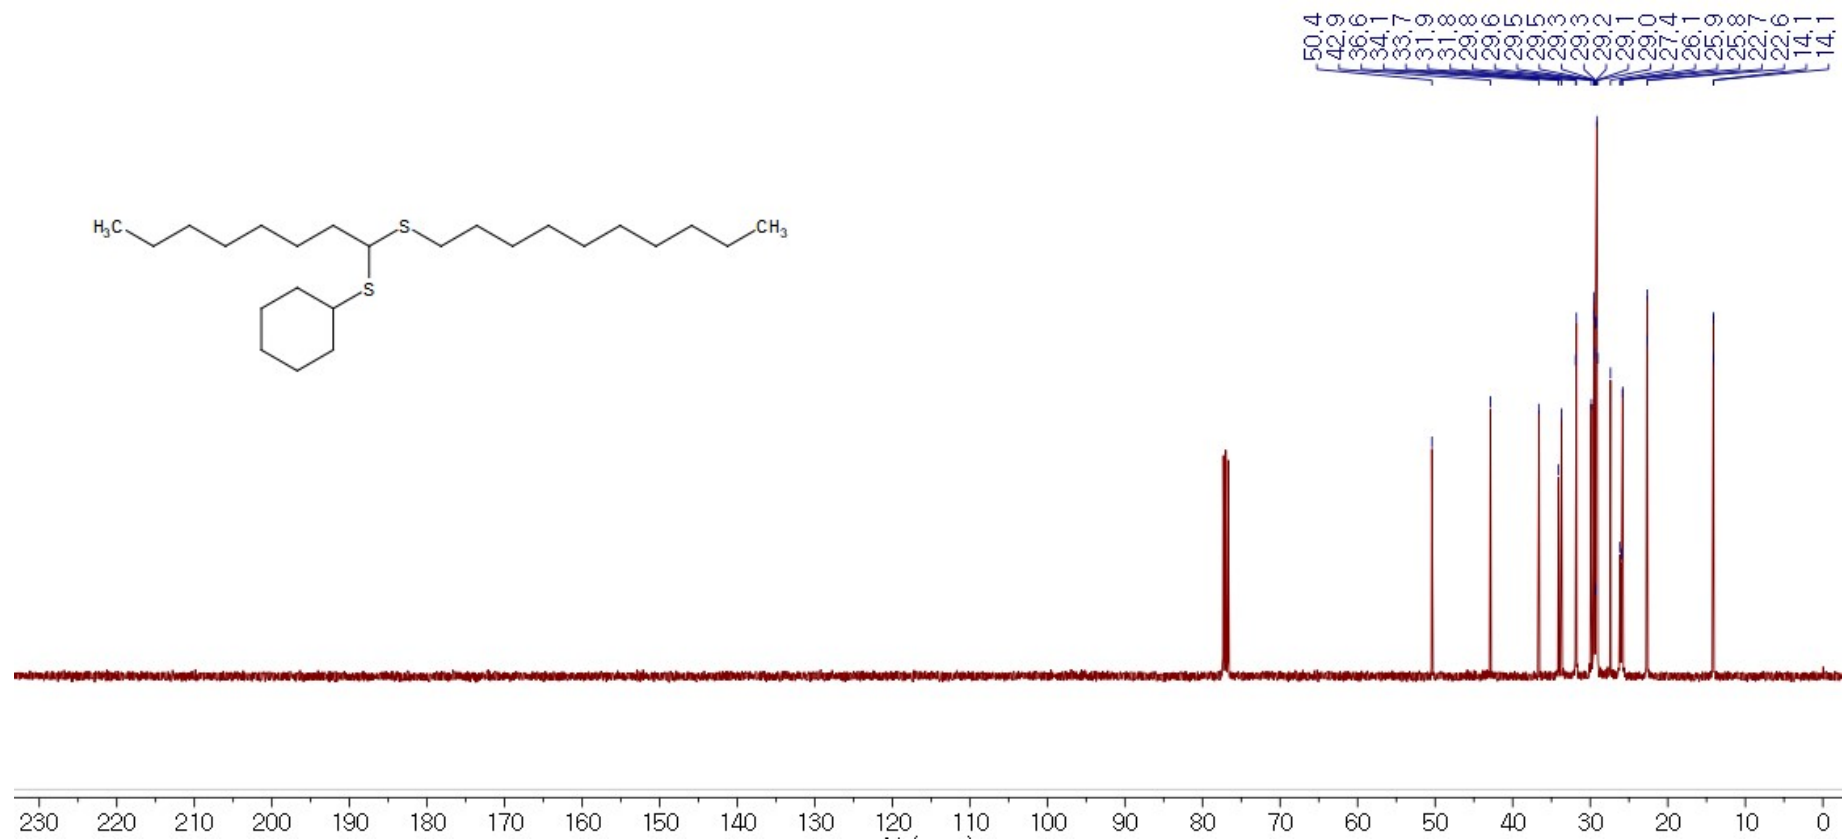

$^{13}\text{C}$  NMR (100 MHz,  $\text{CDCl}_3$ ) spectra of Cyclohexyl(1-(decylthio)octyl)sulfane (**3en**)



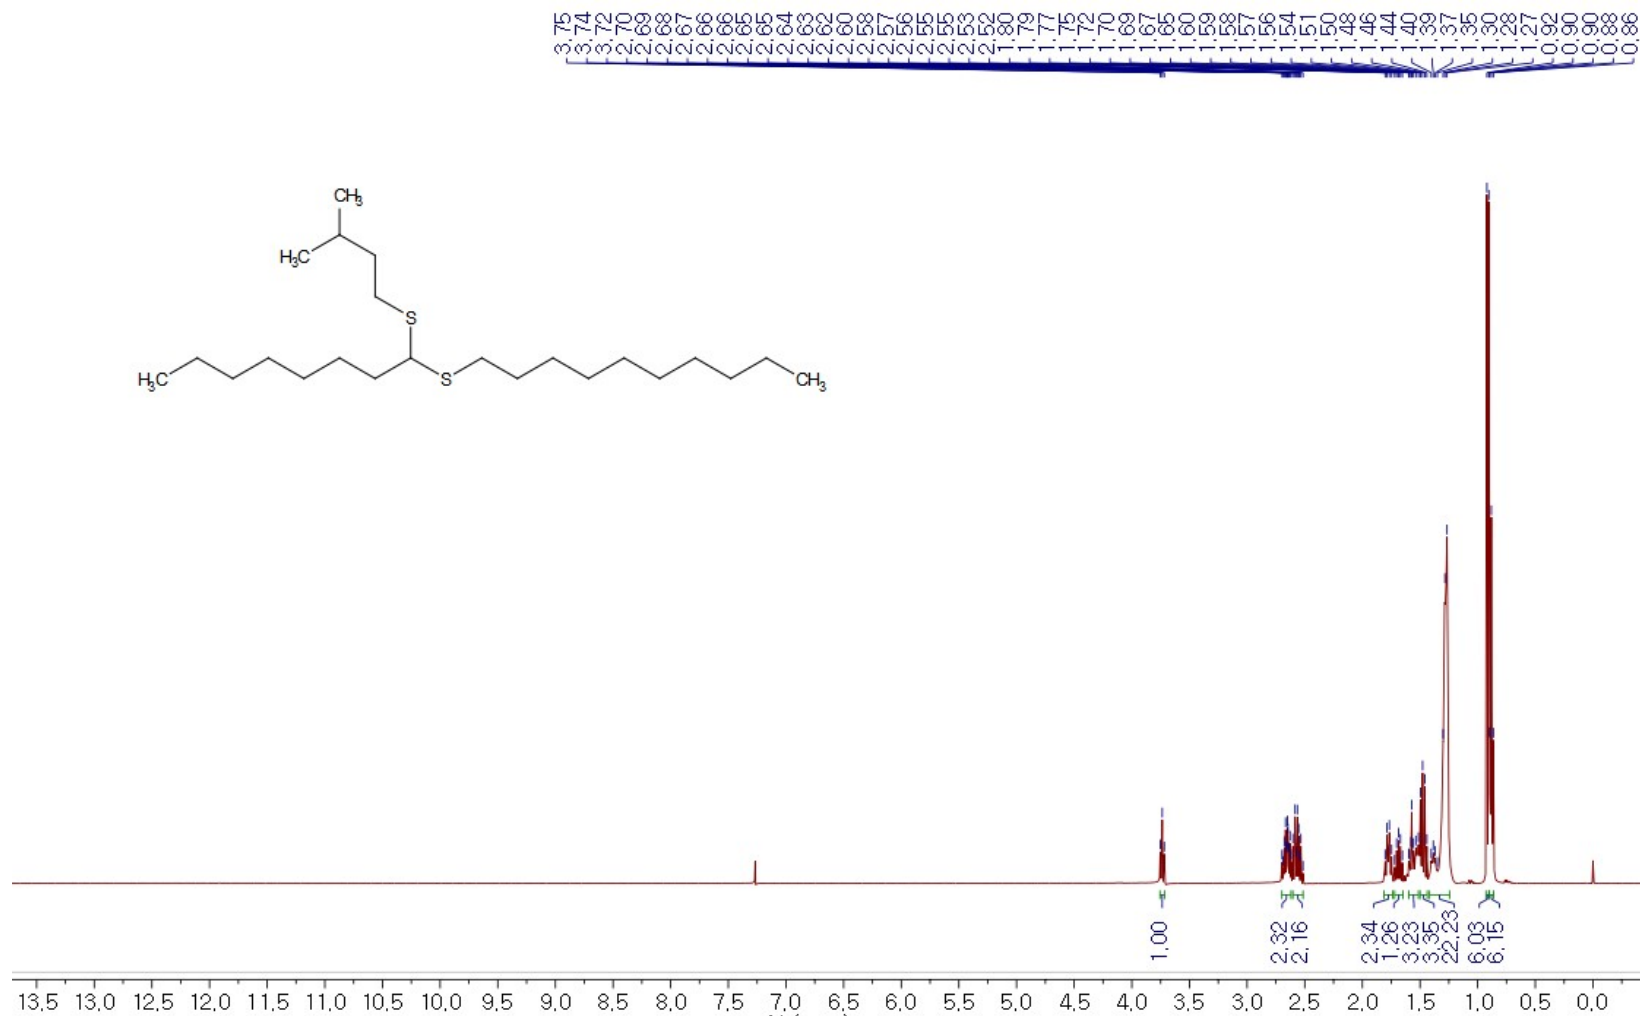

$^1\text{H}$  NMR (400 MHz,  $\text{CDCl}_3$ ) spectra of Decyl(1-(isopentylthio)octyl)sulfane (**3eo**)

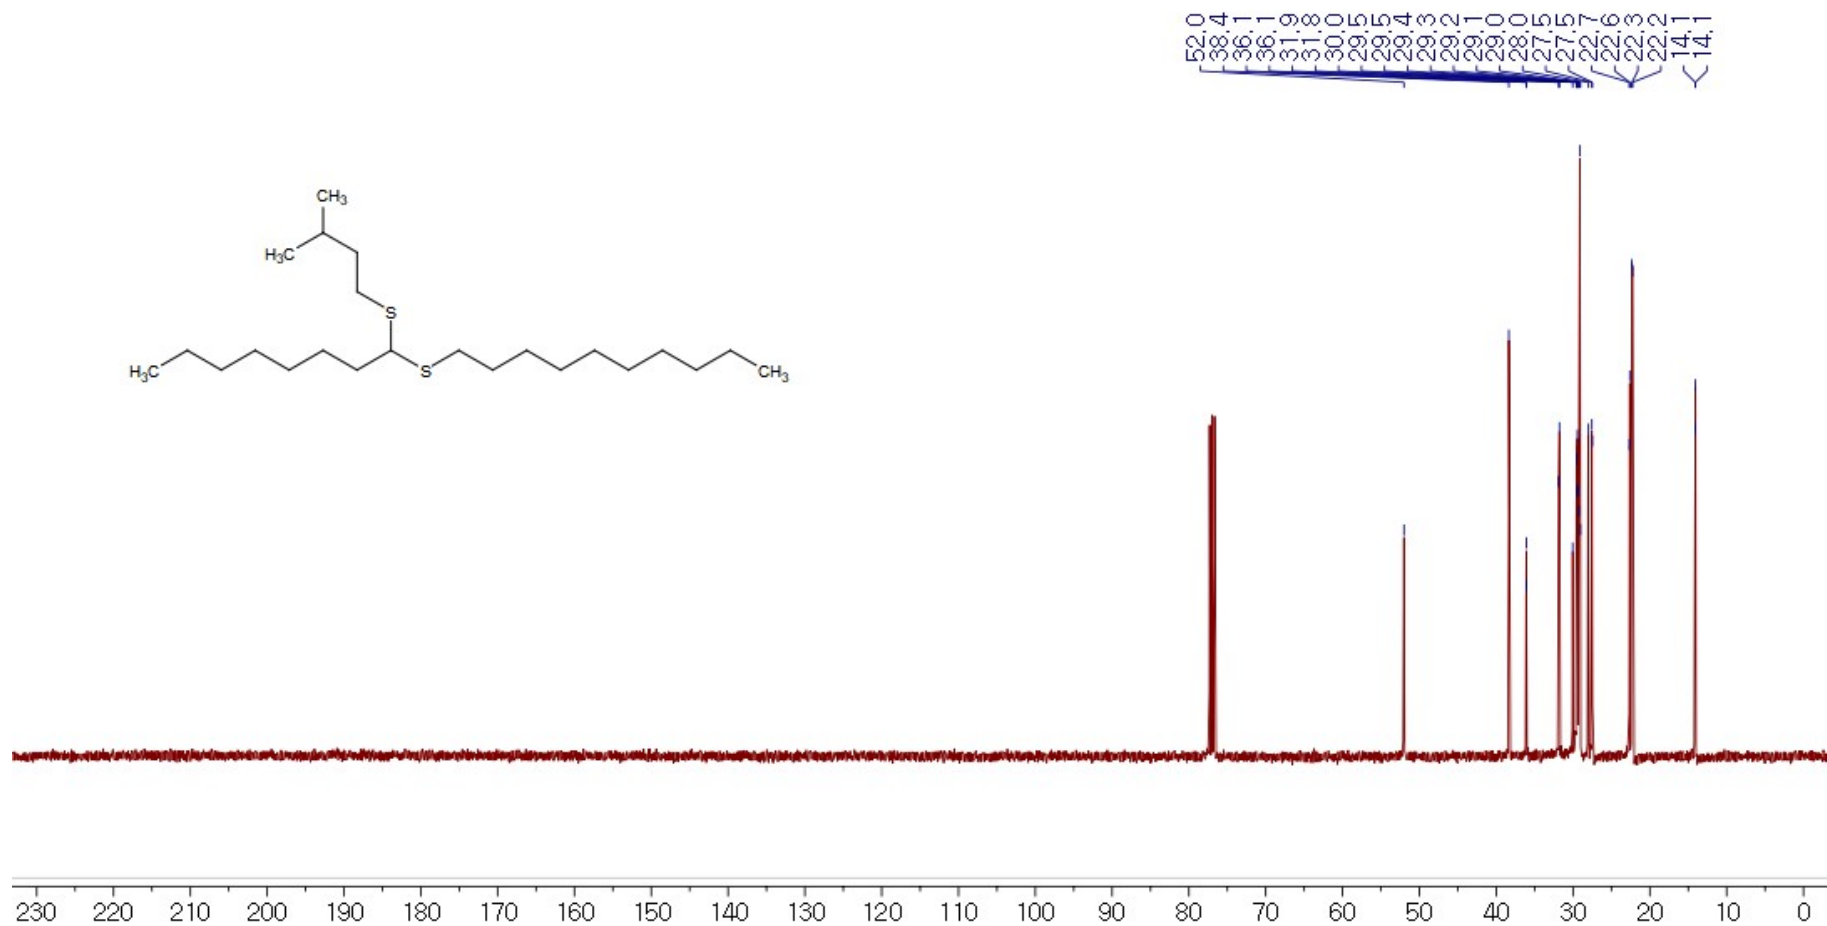

<sup>13</sup>C NMR (100 MHz, CDCl<sub>3</sub>) spectra of Decyl(1-(isopentylthio)octyl)sulfane (3eo)

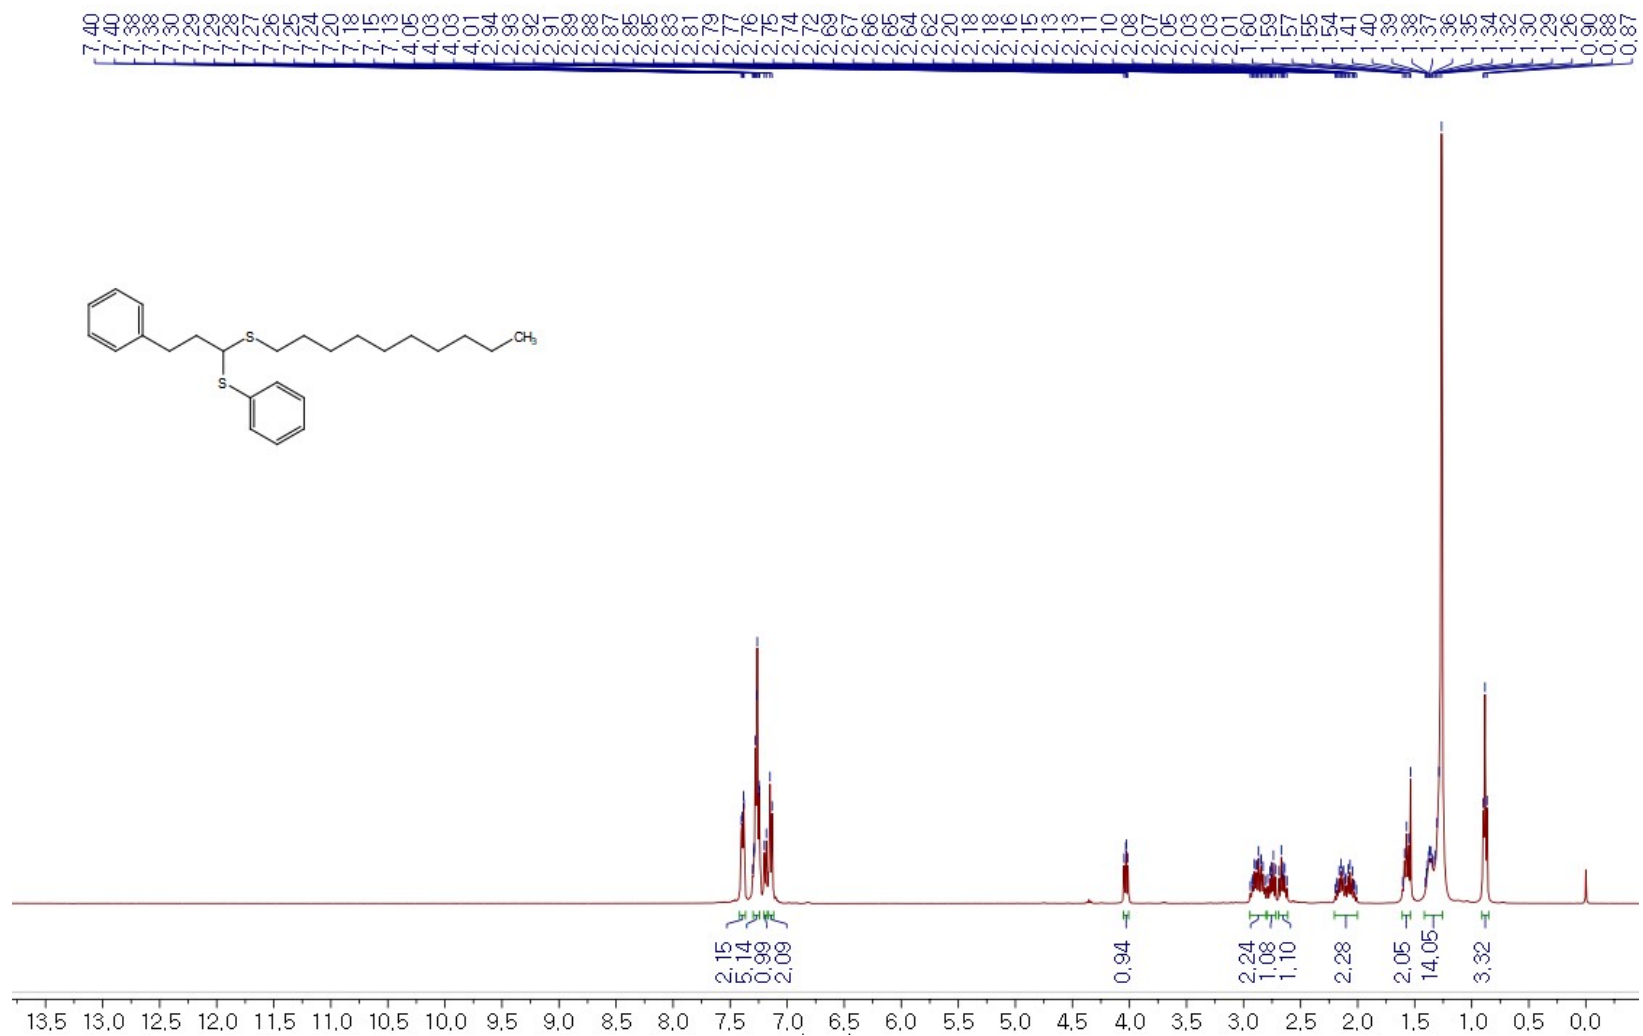

<sup>1</sup>H NMR (400 MHz, CDCl<sub>3</sub>) spectra of Decyl(3-phenyl-1-(phenylthio)propyl)sulfane (**3fa**)

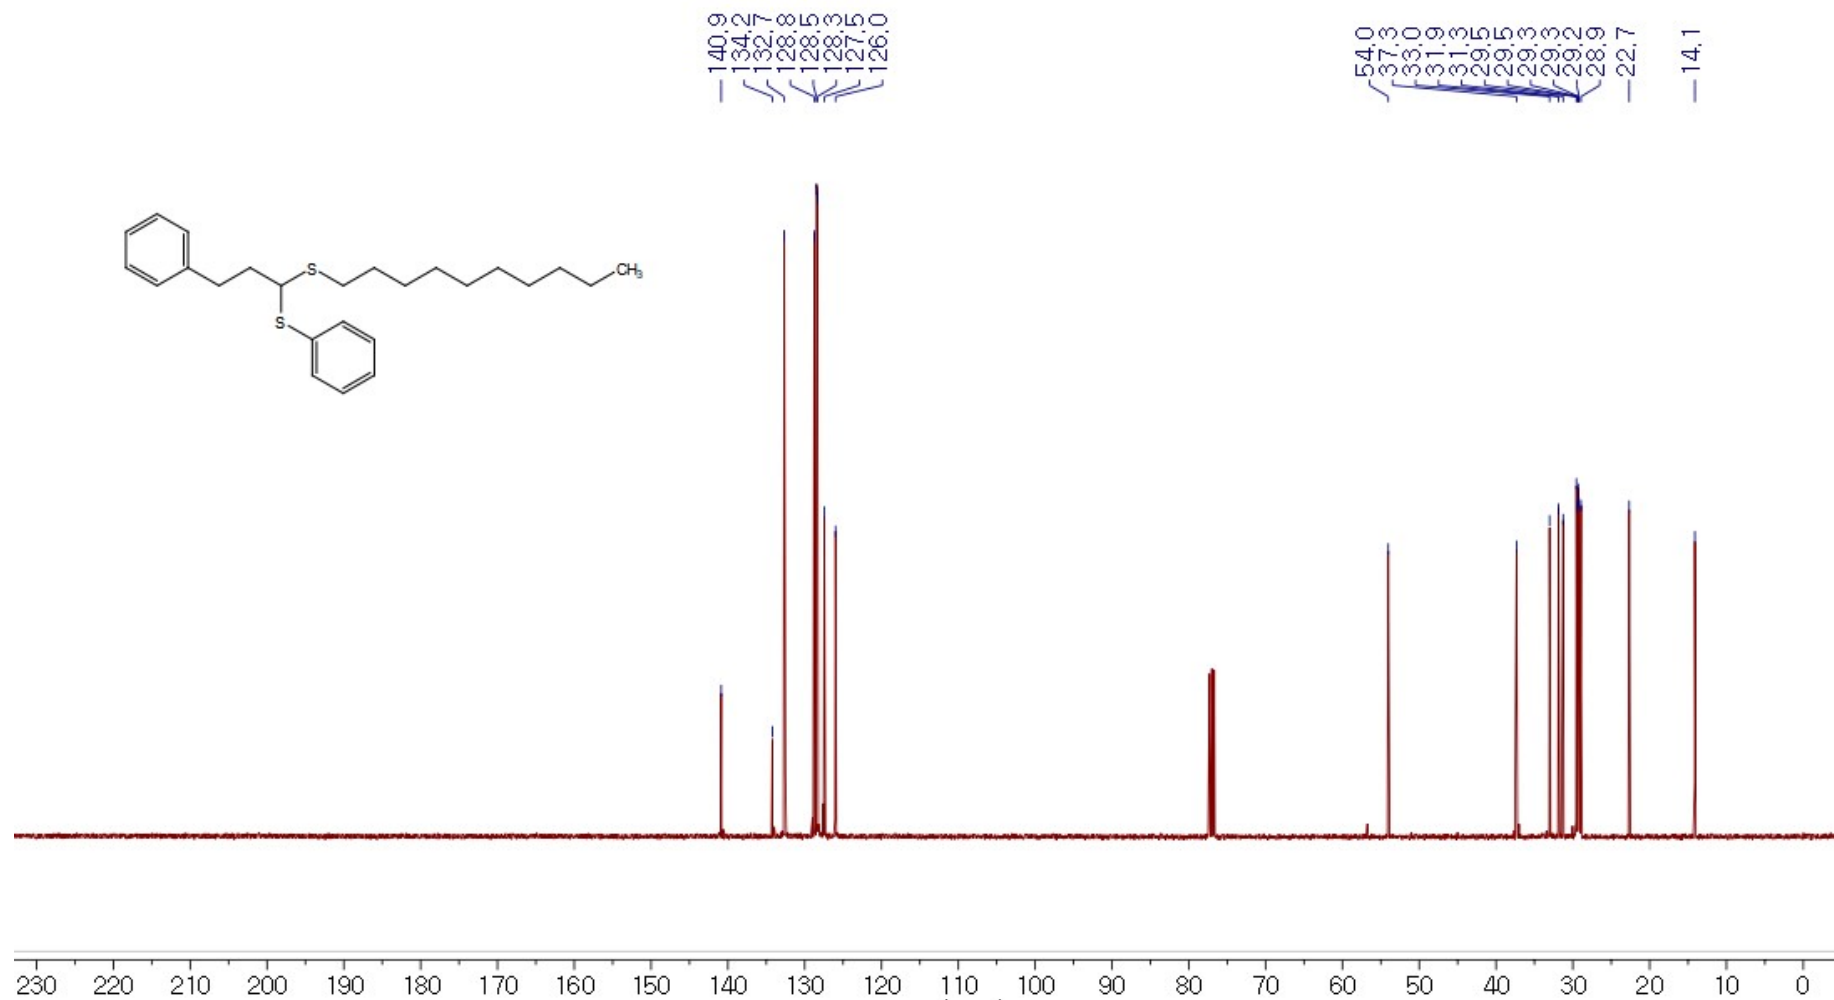

<sup>13</sup>C NMR (100 MHz, CDCl<sub>3</sub>) spectra of Decyl(3-phenyl-1-(phenylthio)propyl)sulfane (**3fa**)

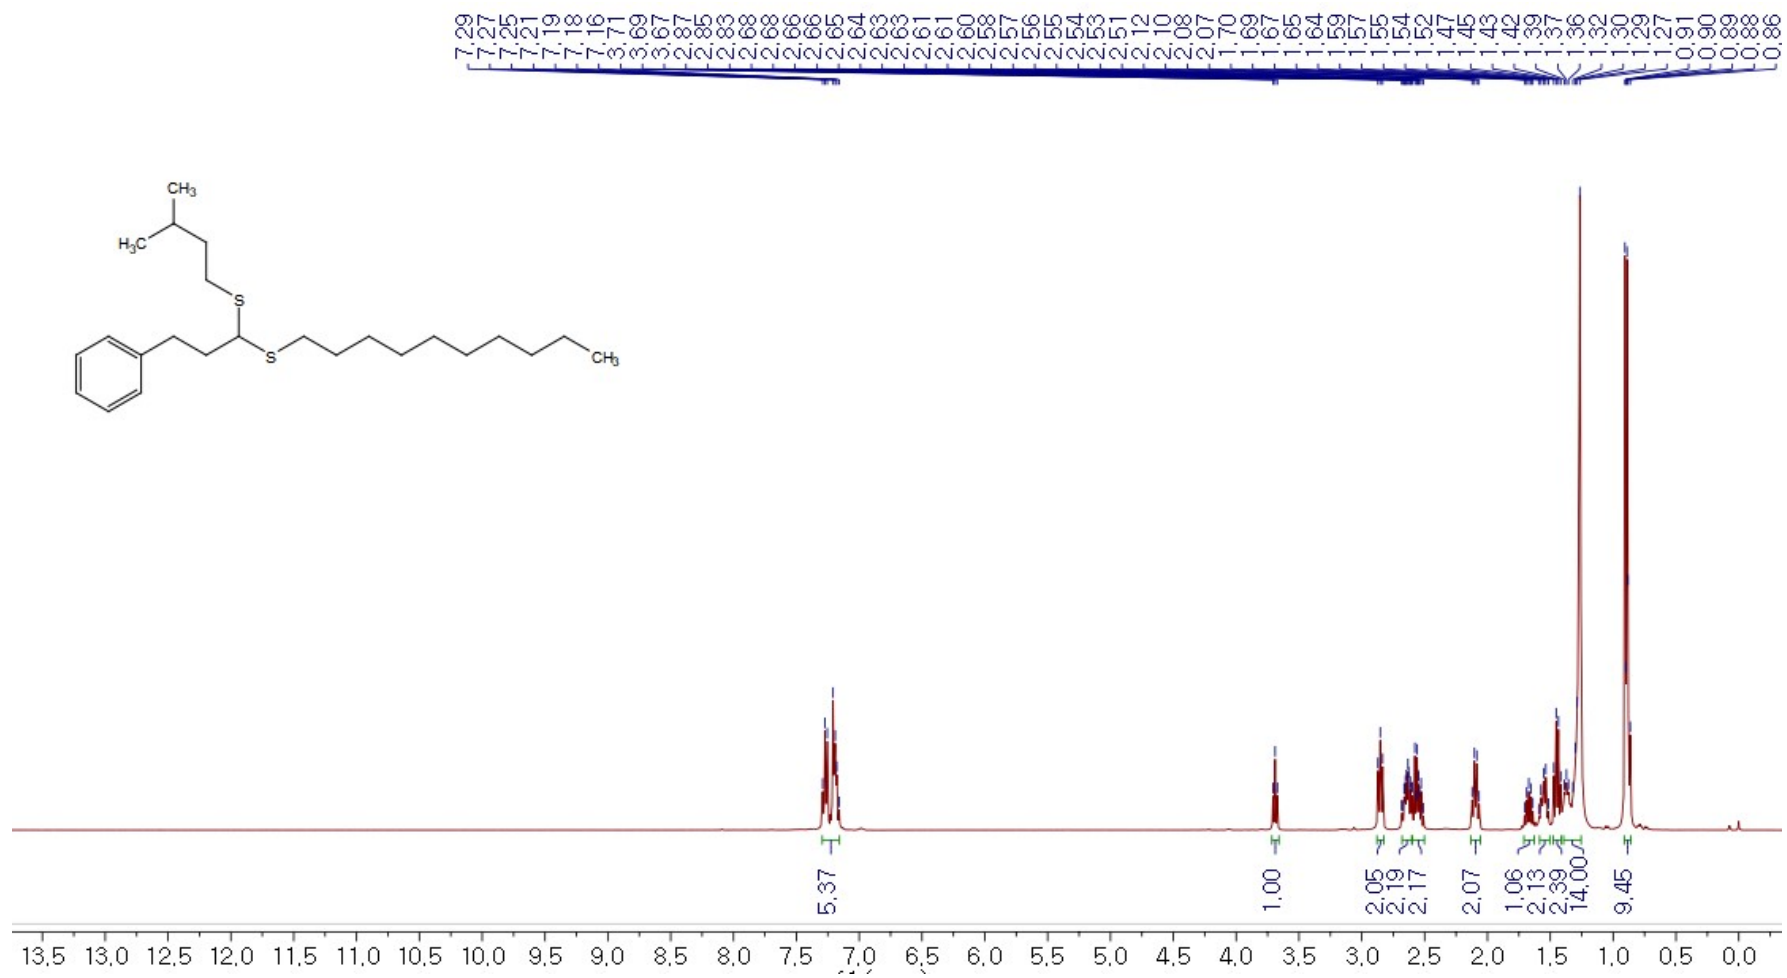

<sup>1</sup>H NMR (400 MHz, CDCl<sub>3</sub>) spectra of Decyl(1-(isopentylthio)-3-phenylpropyl)sulfane (3fo)

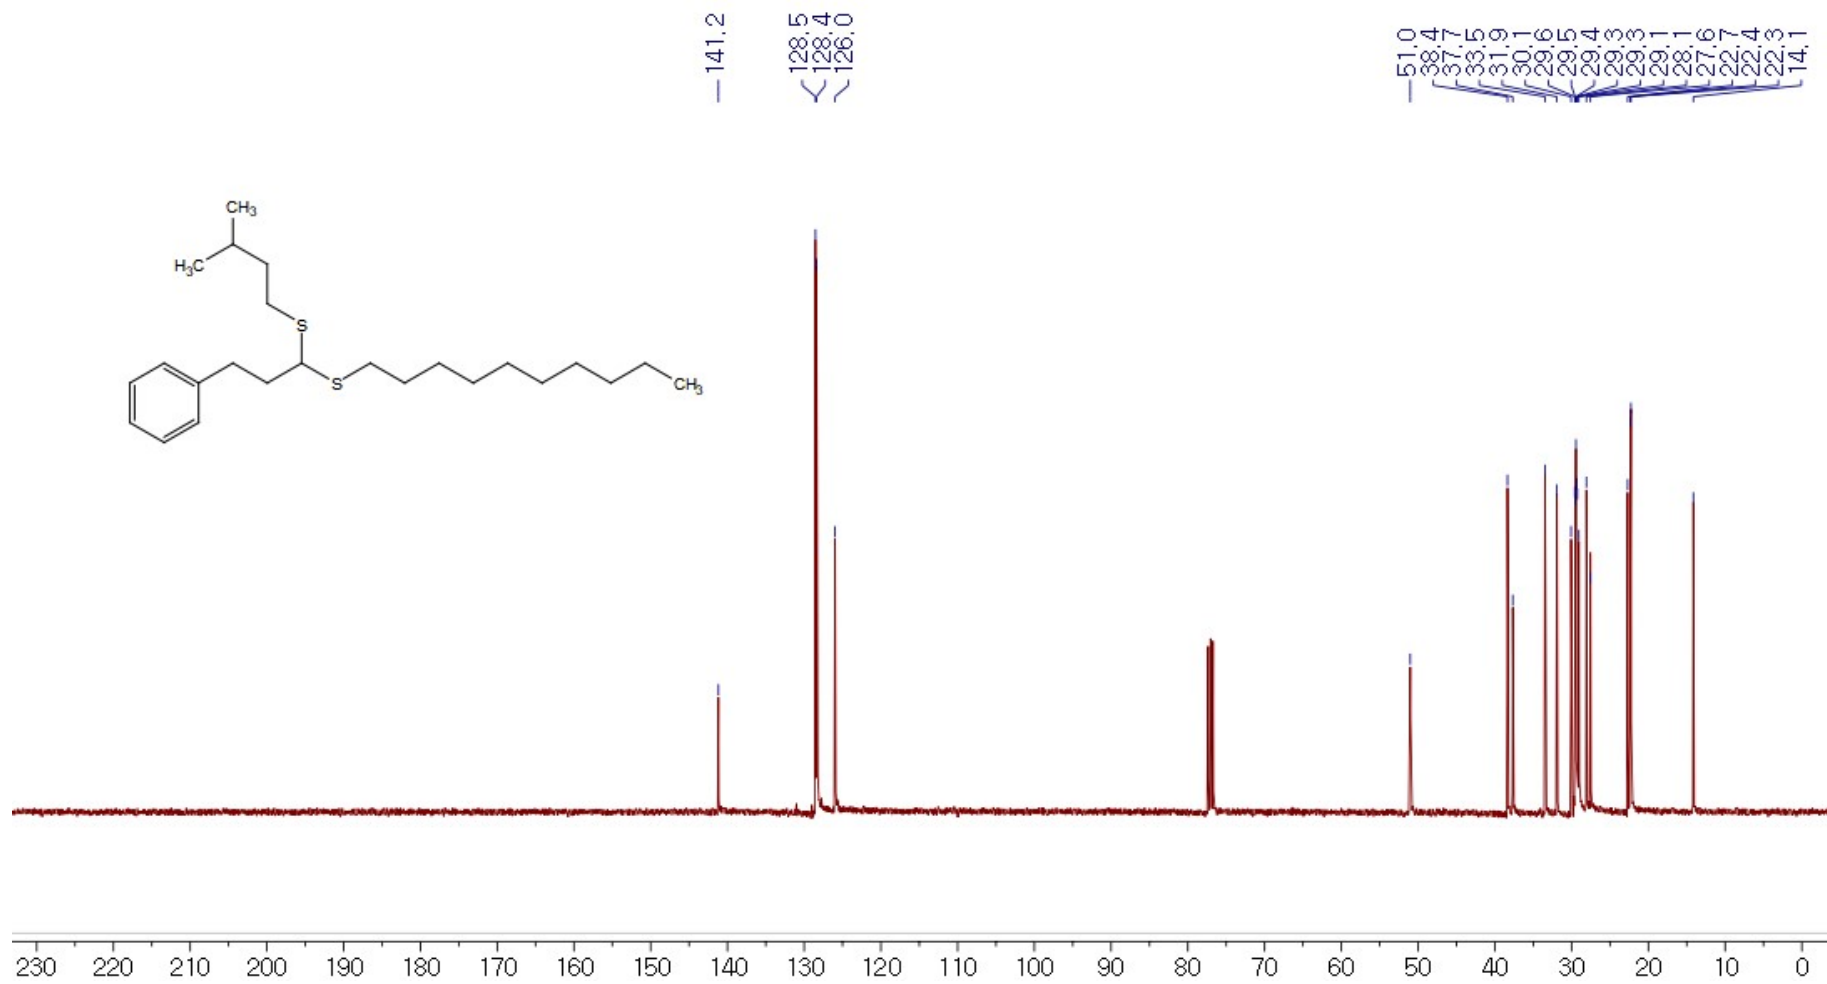

<sup>13</sup>C NMR (100 MHz, CDCl<sub>3</sub>) spectra of decyl(1-(isopentylthio)-3-phenylpropyl)sulfane (**3fo**)

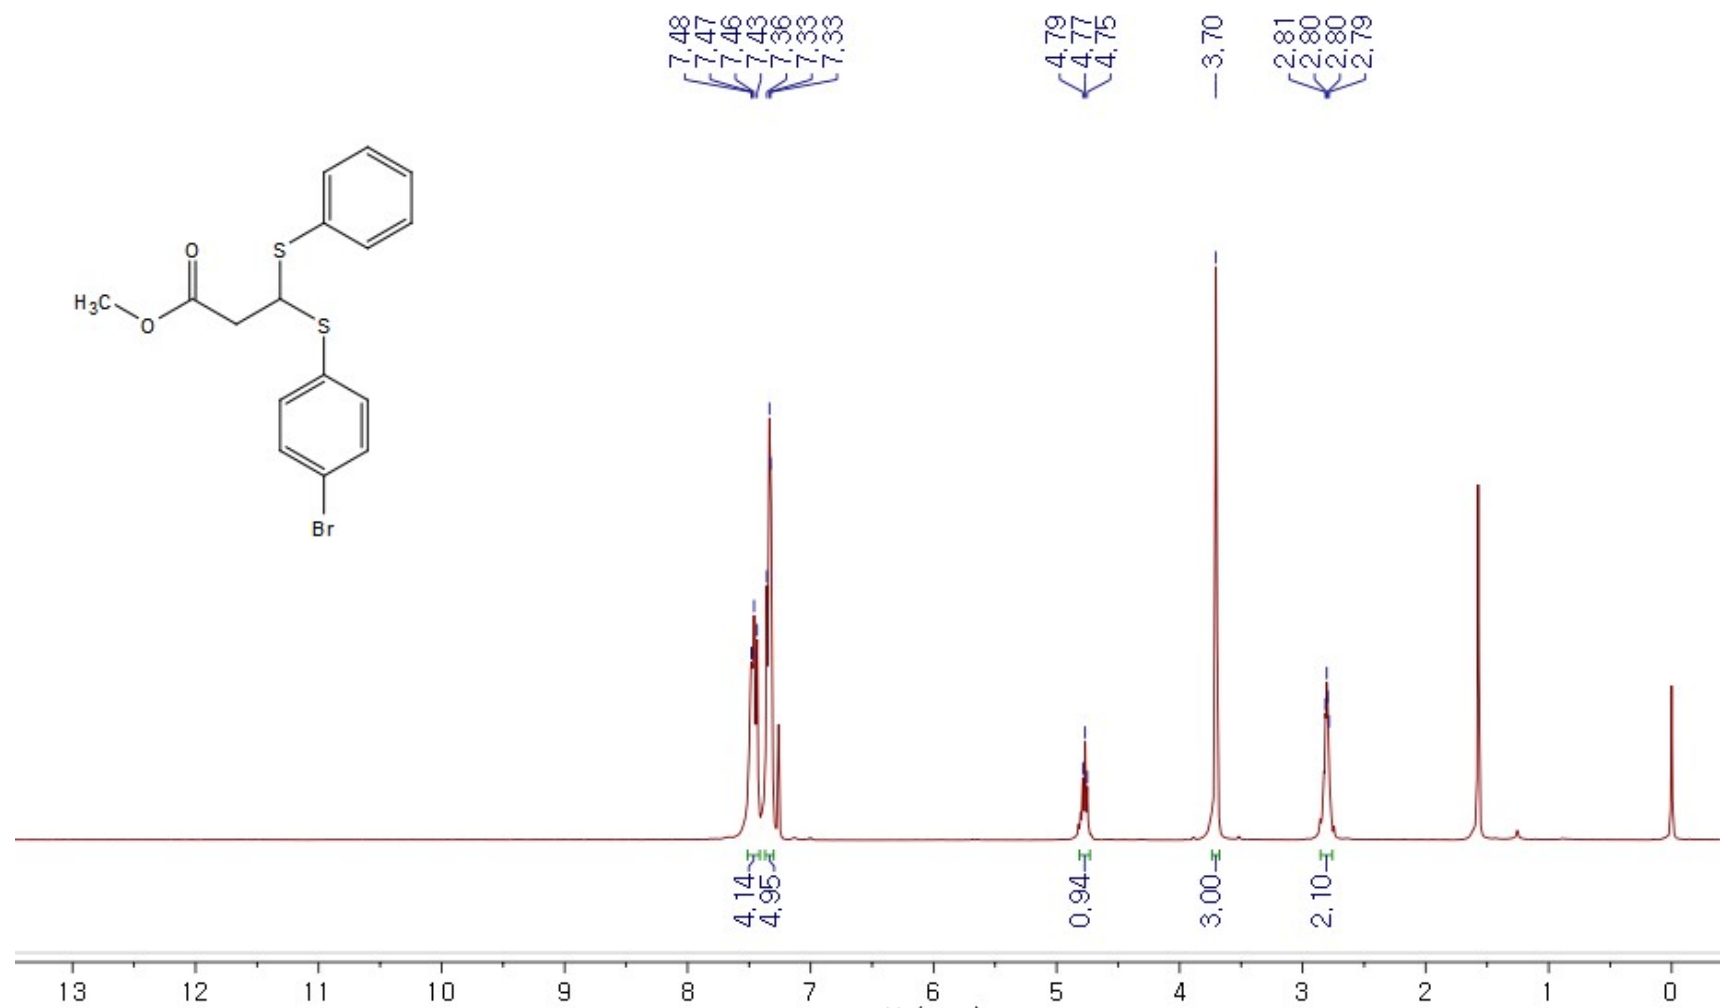

<sup>1</sup>H NMR (400 MHz, CDCl<sub>3</sub>) spectra of Methyl 3-((4-bromophenyl)thio)-3-(phenylthio)propanoate (**3gc**)

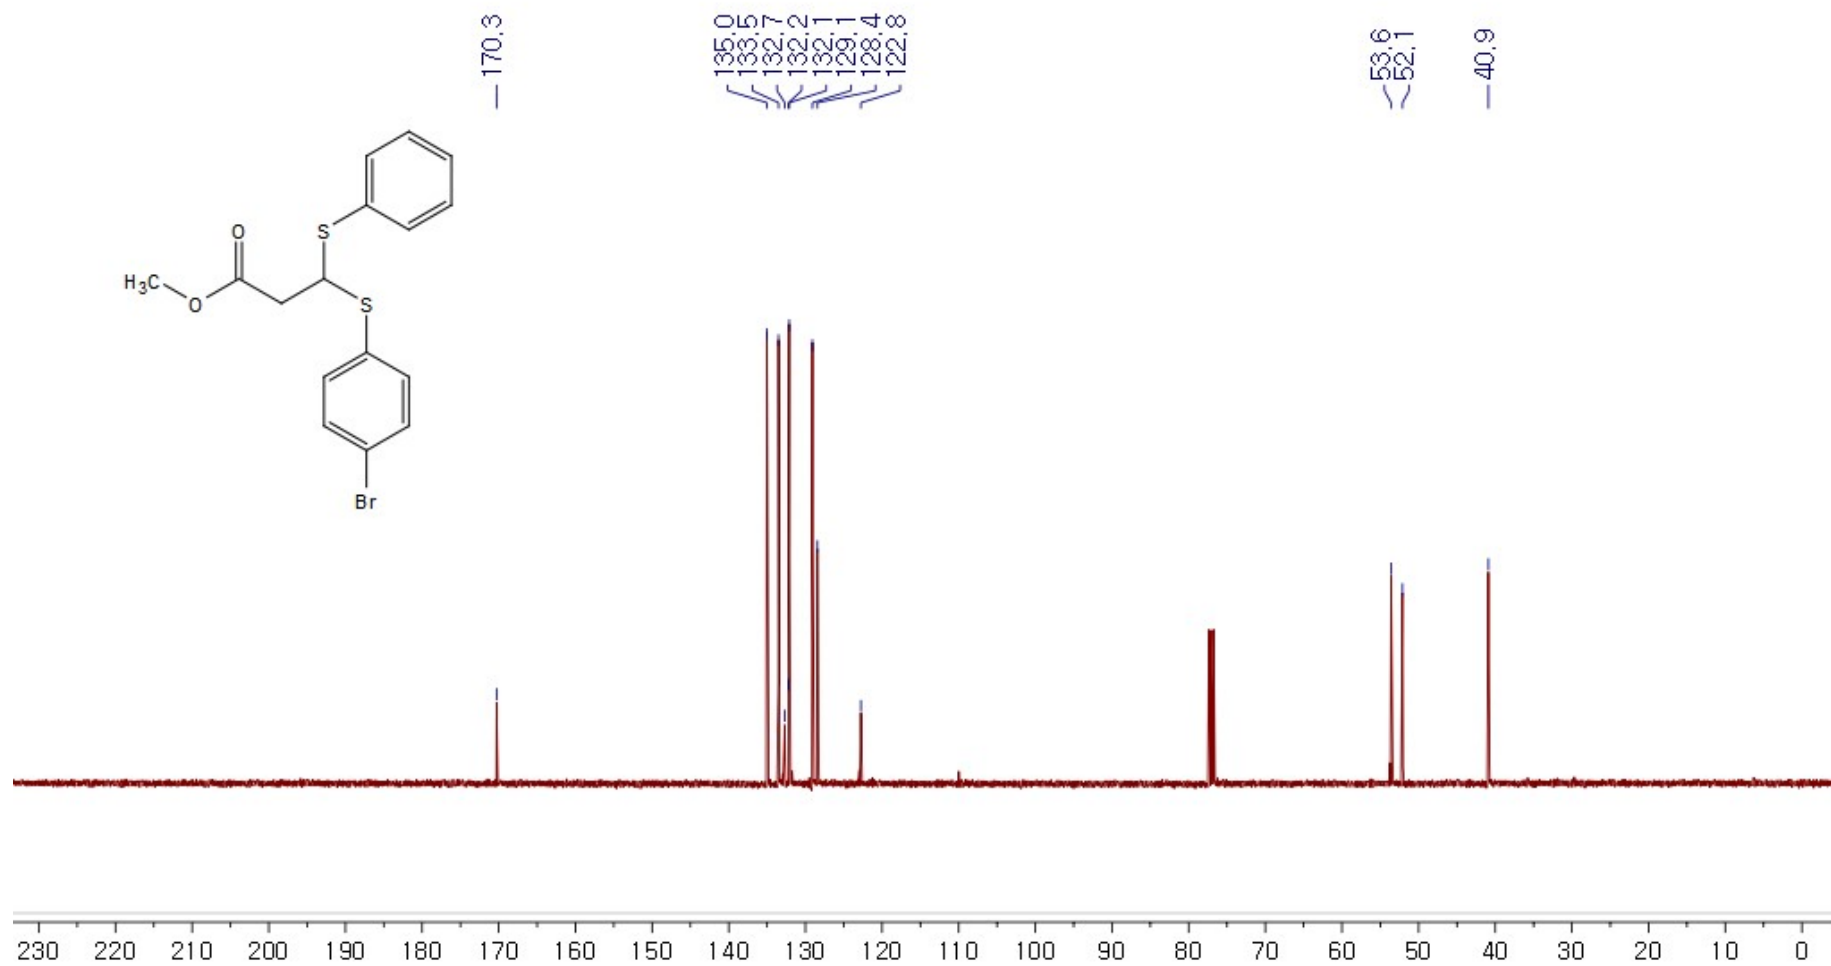

$^{13}\text{C}$  NMR (100 MHz,  $\text{CDCl}_3$ ) spectra of Methyl 3-((4-bromophenyl)thio)-3-(phenylthio)propanoate (**3gc**)



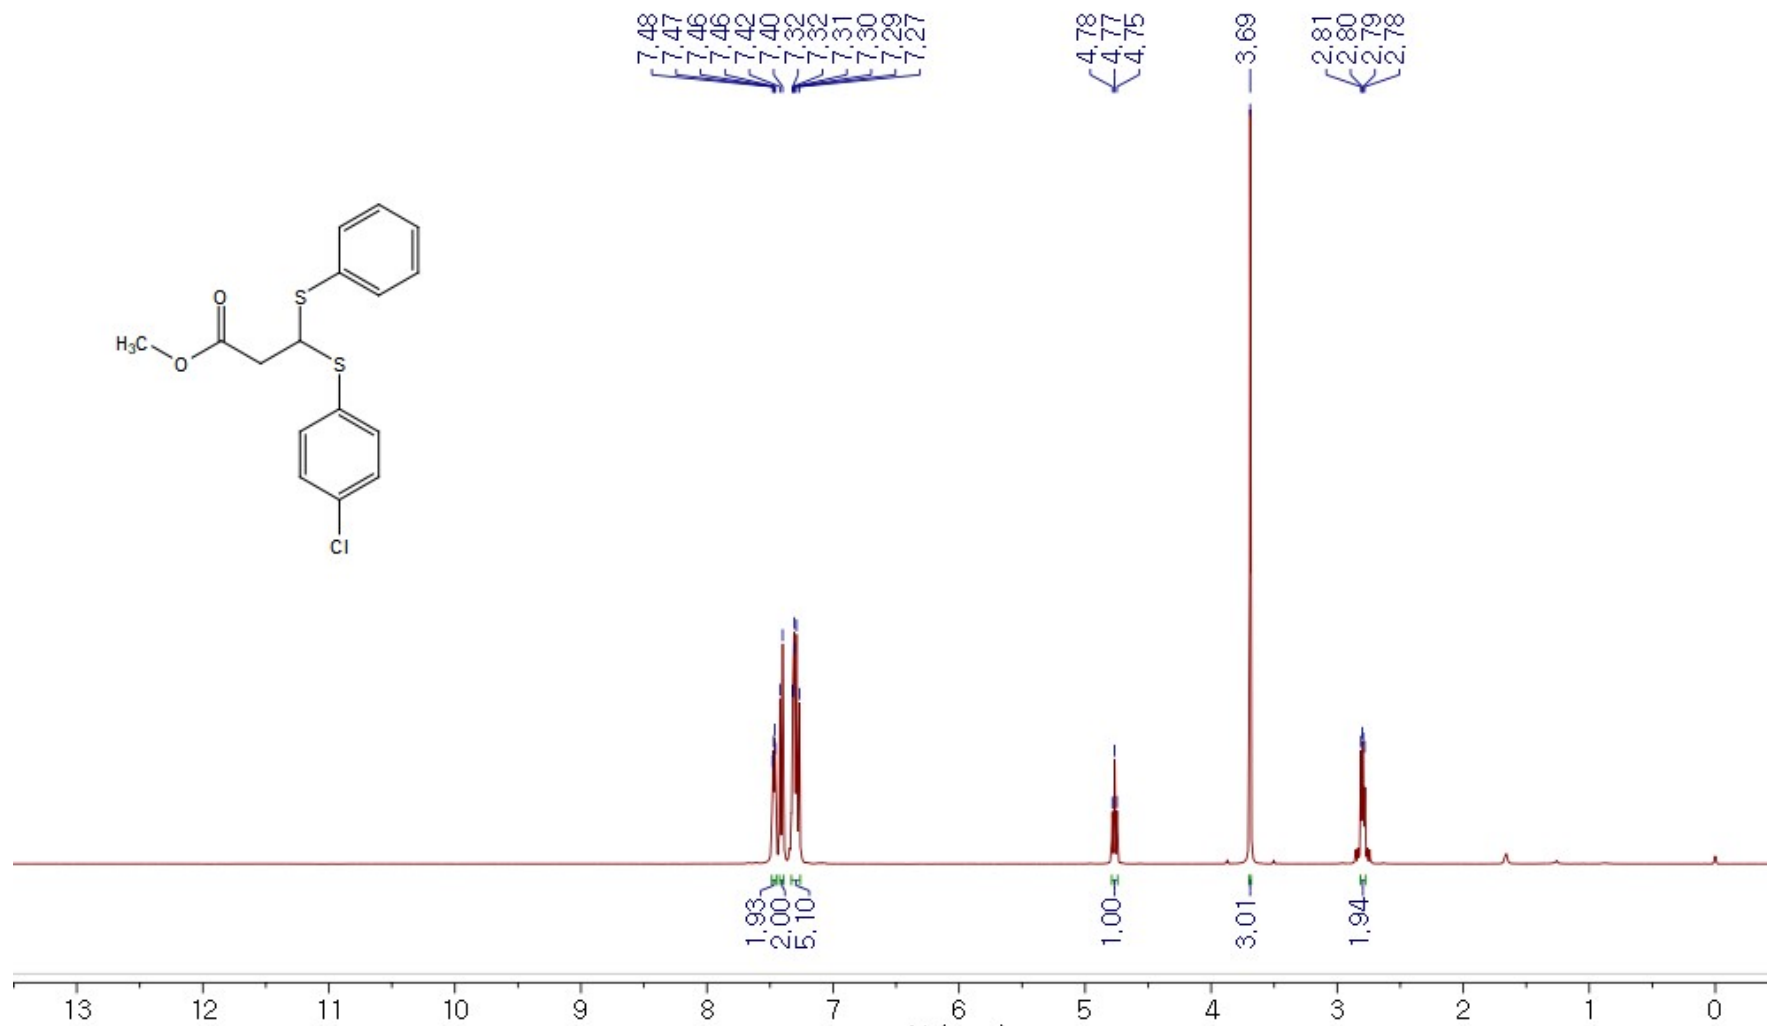

<sup>1</sup>H NMR (400 MHz, CDCl<sub>3</sub>) spectra of Methyl 3-((4-chlorophenyl)thio)-3-(phenylthio)propanoate (**3gd**)

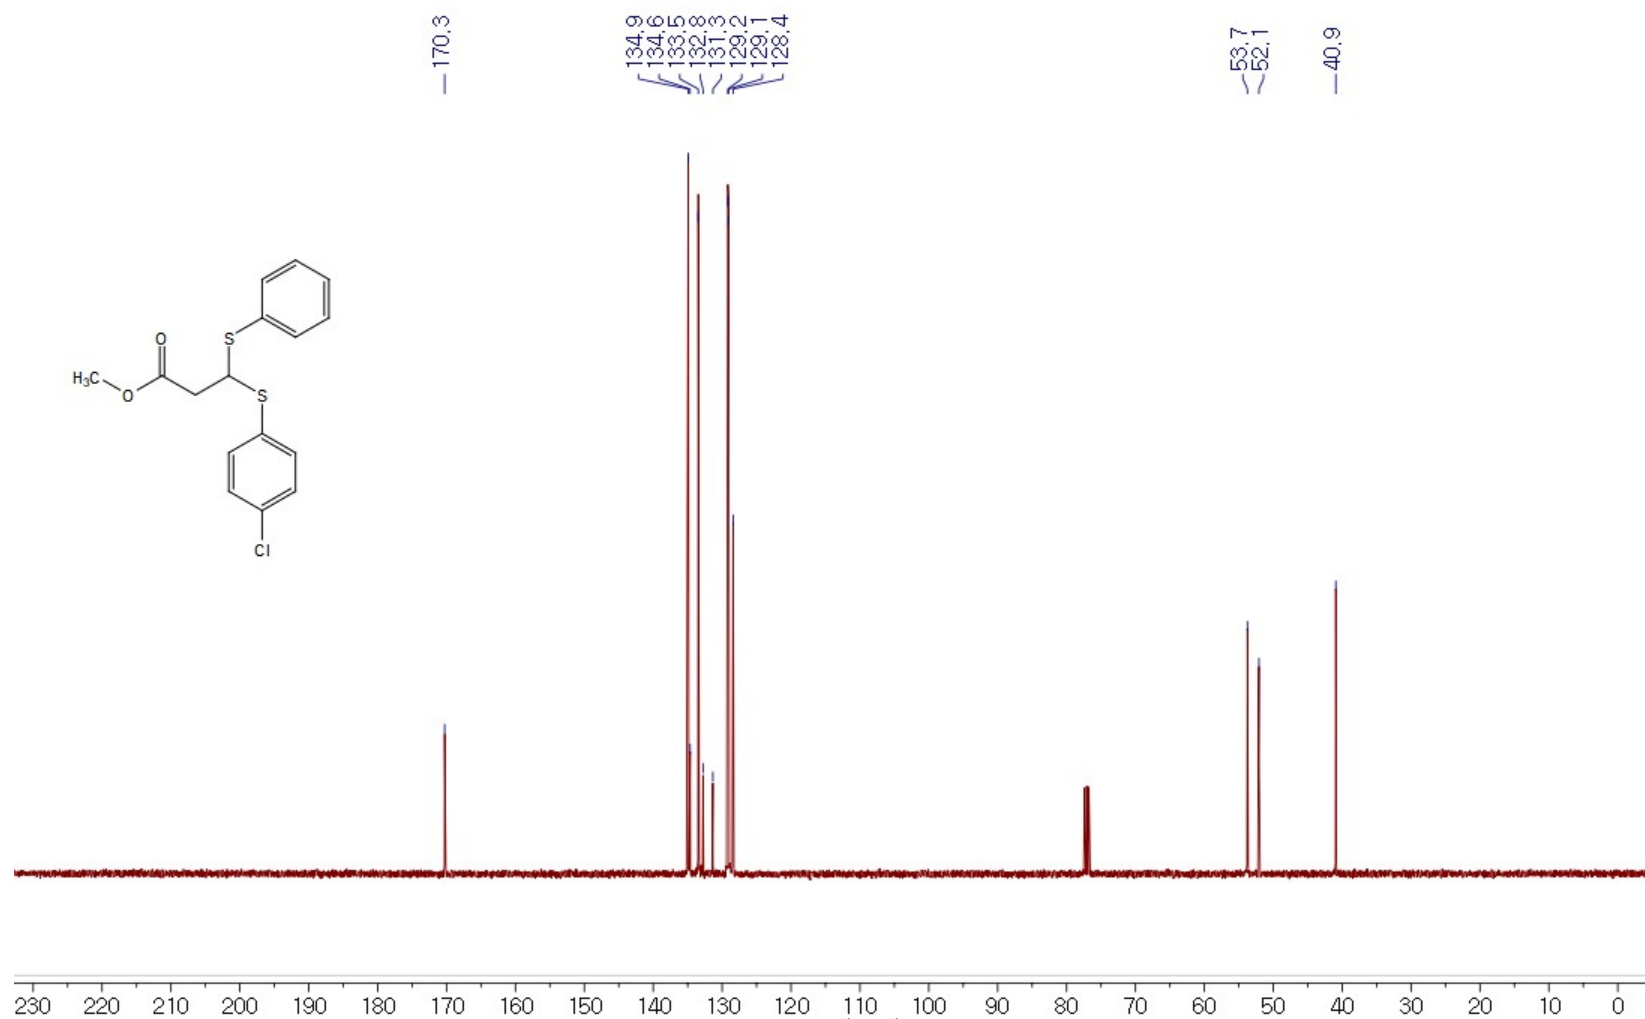

$^{13}\text{C}$  NMR (100 MHz,  $\text{CDCl}_3$ ) spectra of Methyl 3-((4-chlorophenyl)thio)-3-(phenylthio)propanoate (**3gd**)

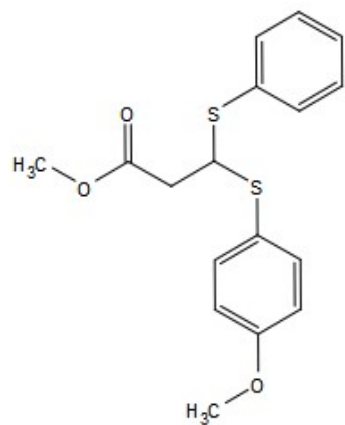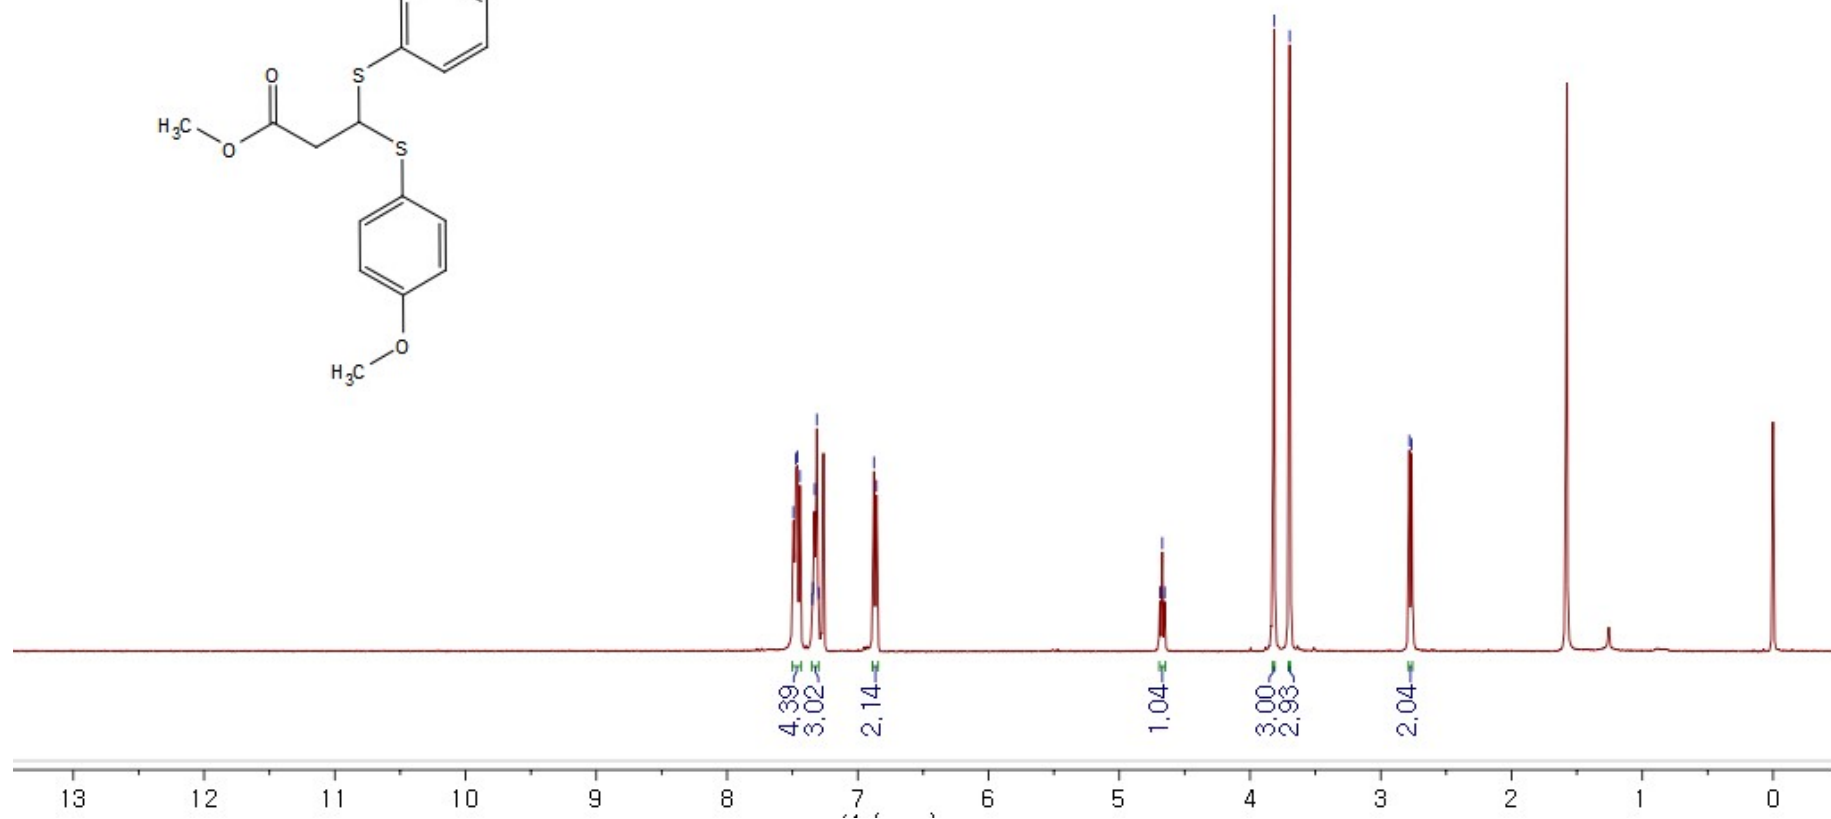

<sup>1</sup>H NMR (400 MHz, CDCl<sub>3</sub>) spectra of Methyl 3-((4-methoxyphenyl)thio)-3-(phenylthio)propanoate (**3gf**)

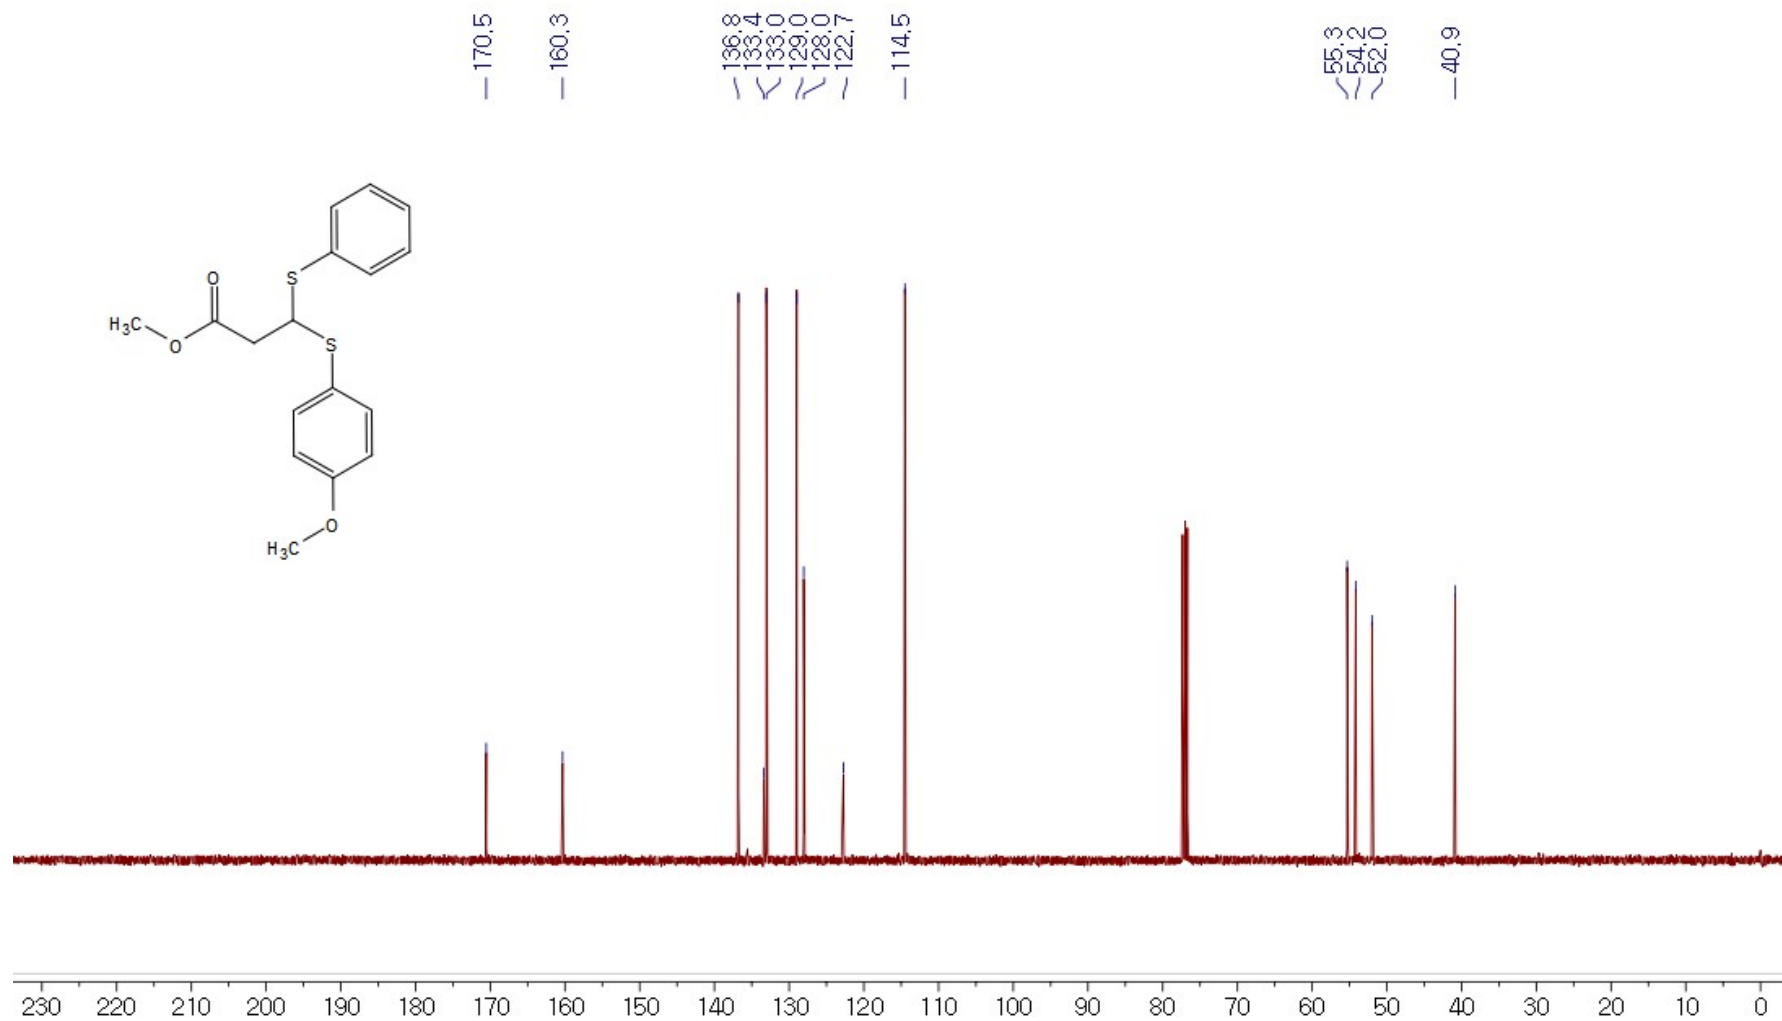

<sup>13</sup>C NMR (100 MHz, CDCl<sub>3</sub>) spectra of Methyl 3-((4-methoxyphenyl)thio)-3-(phenylthio)propanoate (**3gf**)

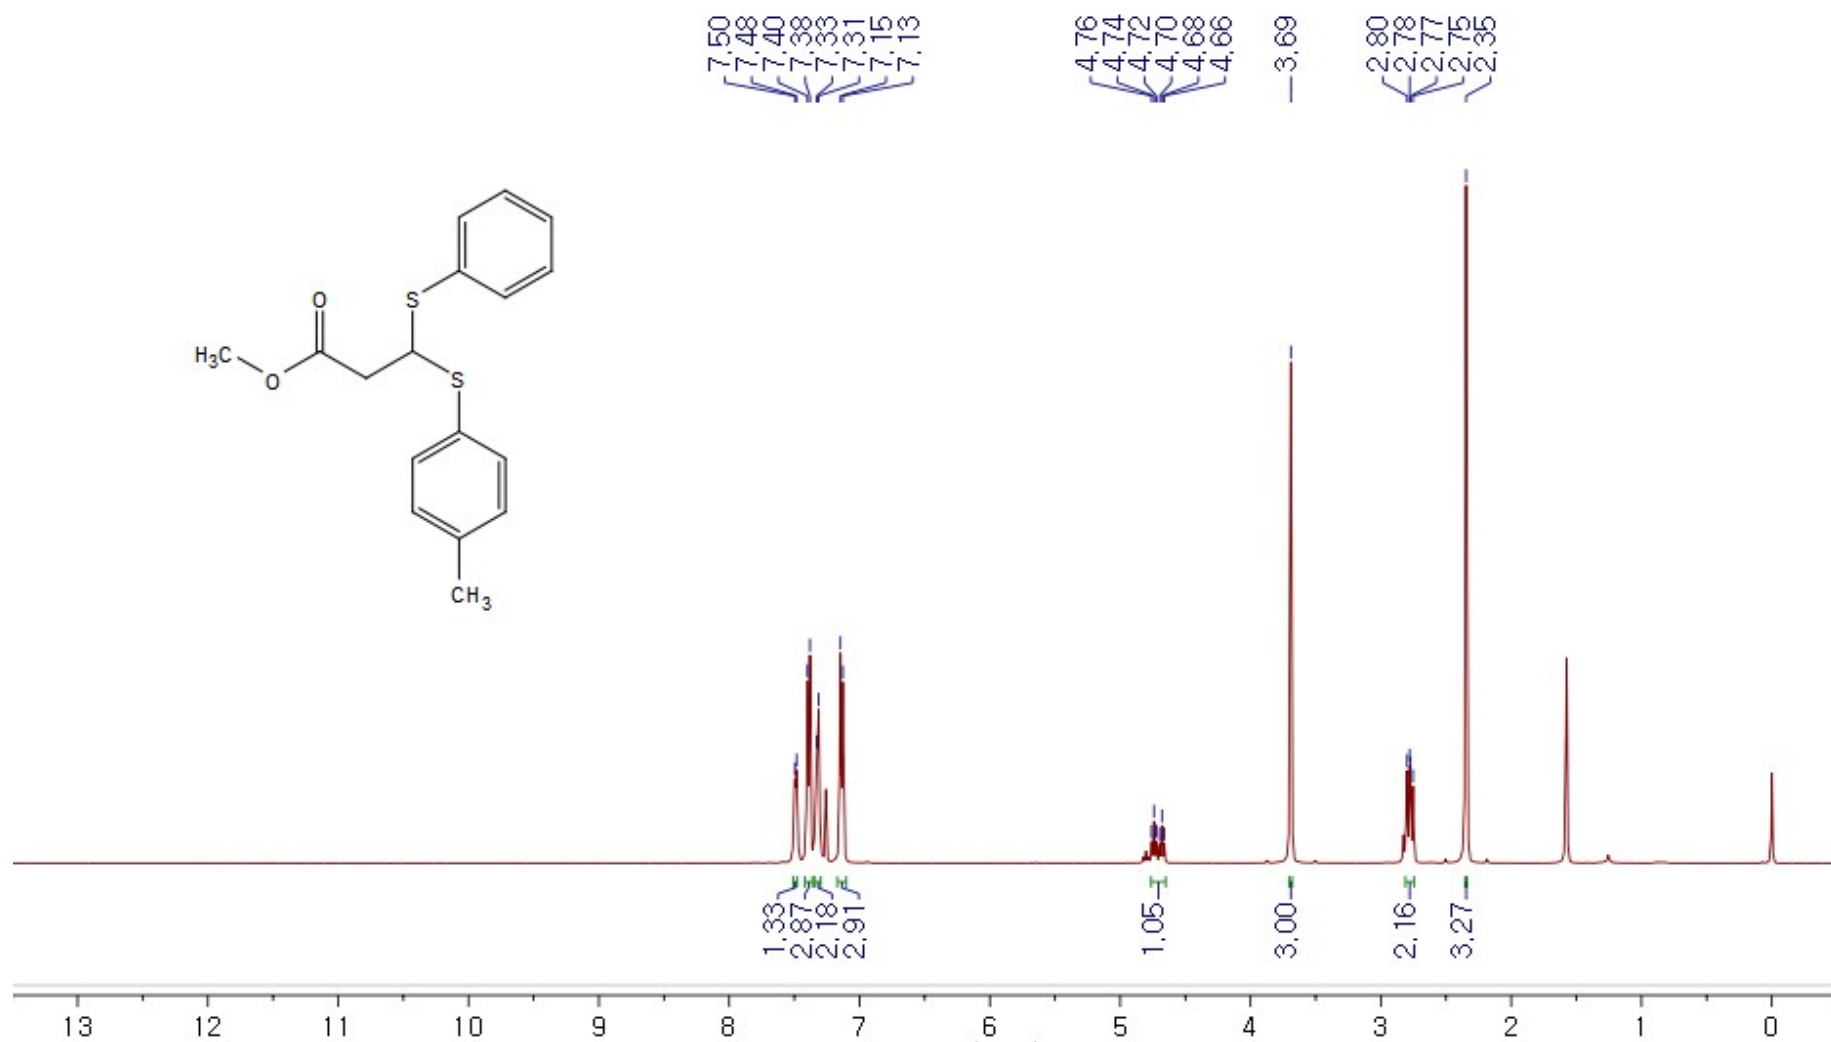

<sup>1</sup>H NMR (400 MHz, CDCl<sub>3</sub>) spectra of Methyl 3-(phenylthio)-3-(p-tolylthio)propanoate (**3gg**)

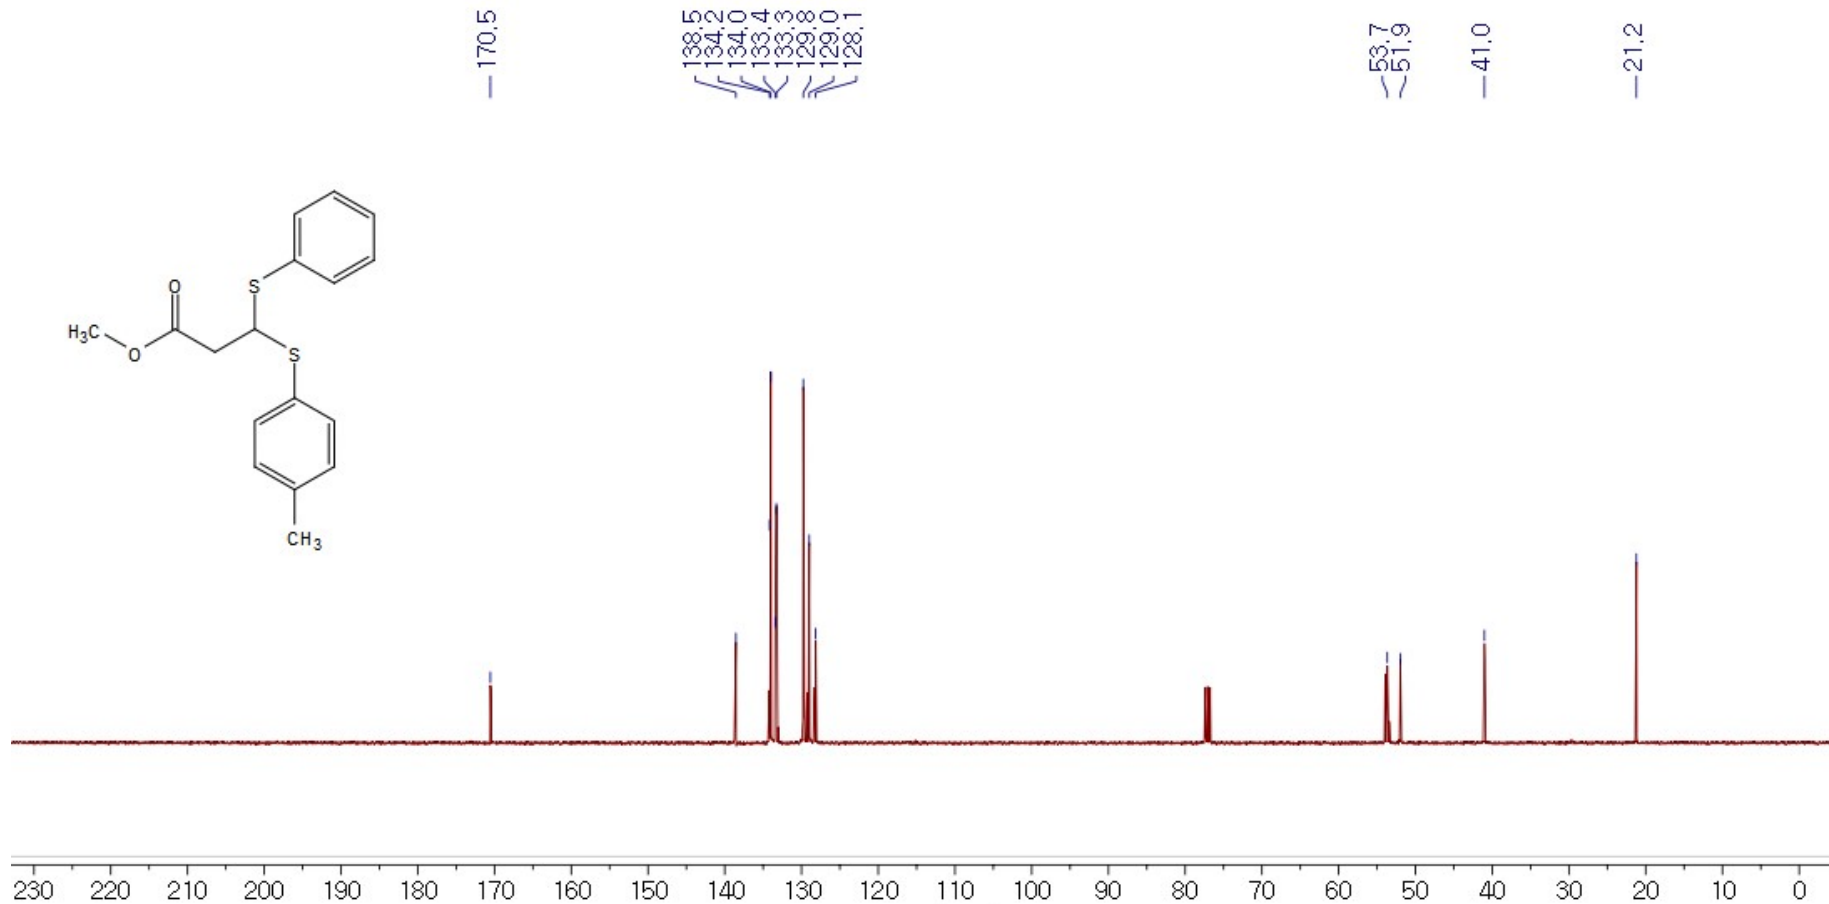

<sup>13</sup>C NMR (100 MHz, CDCl<sub>3</sub>) spectra of Methyl 3-(phenylthio)-3-(p-tolylthio)propanoate (**3gg**)

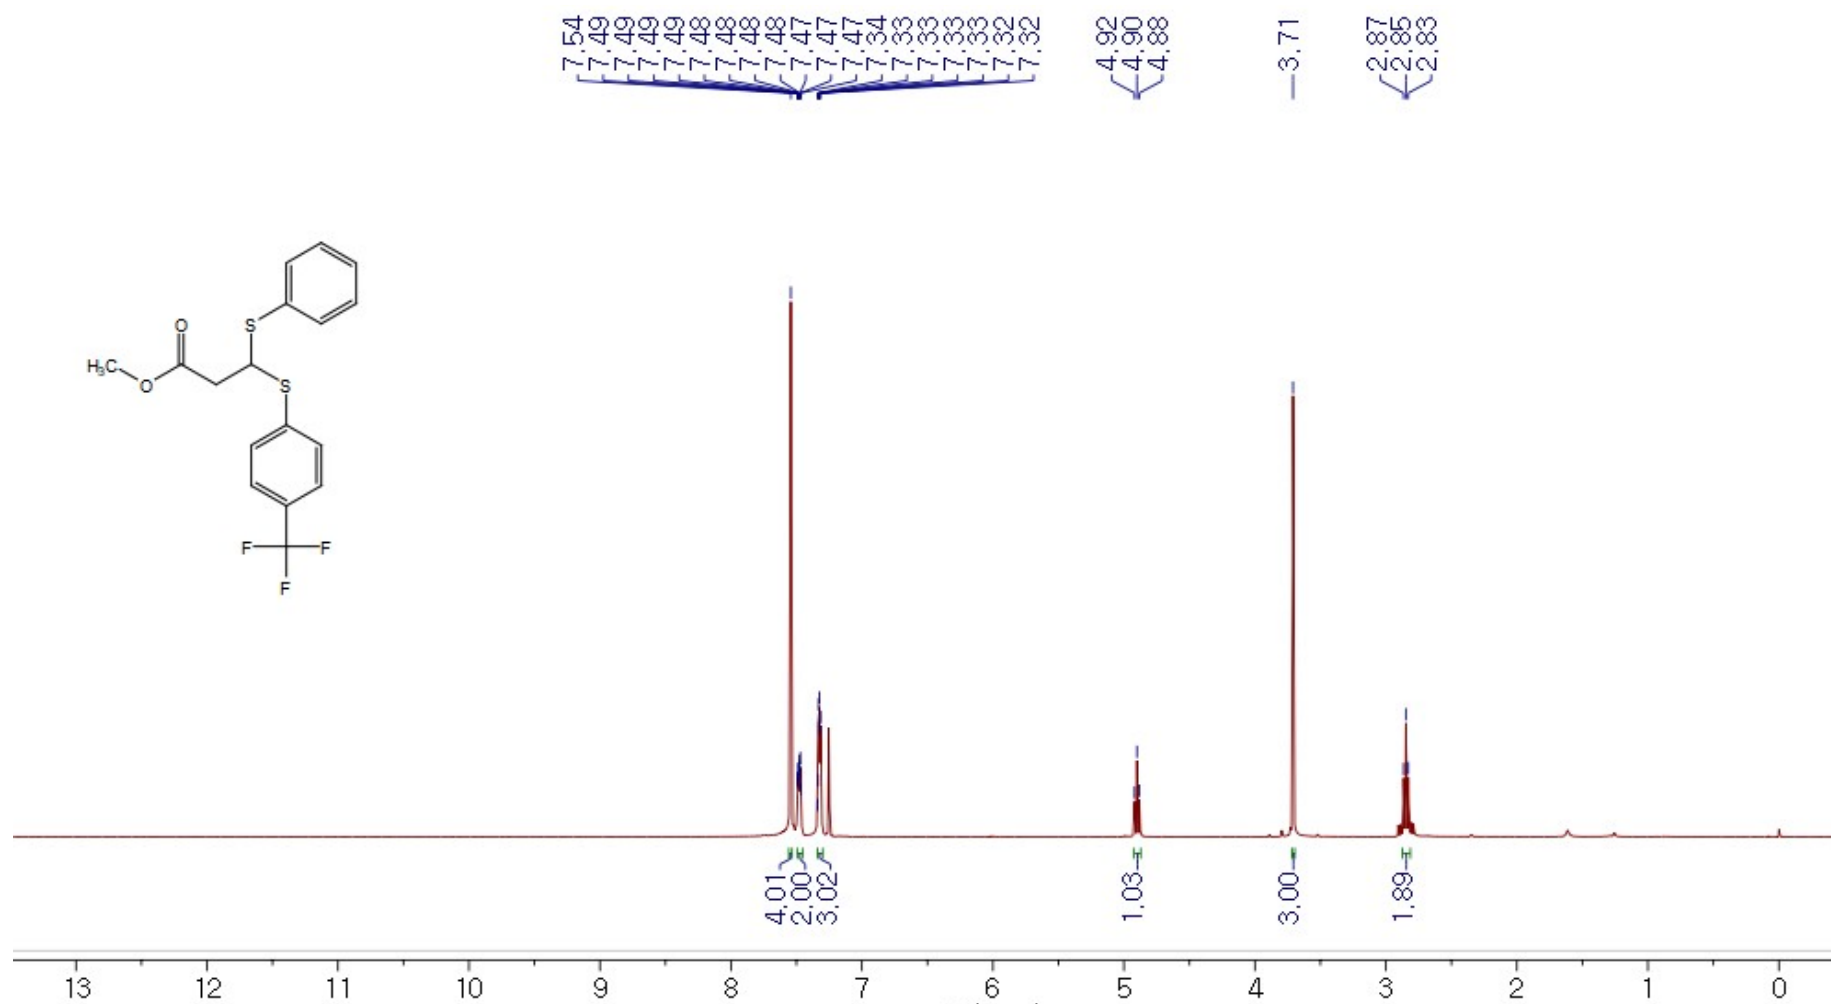

<sup>1</sup>H NMR (400 MHz, CDCl<sub>3</sub>) spectra of Methyl 3-(phenylthio)-3-((4-(trifluoromethyl)phenyl)thio)propanoate (**3gh**)

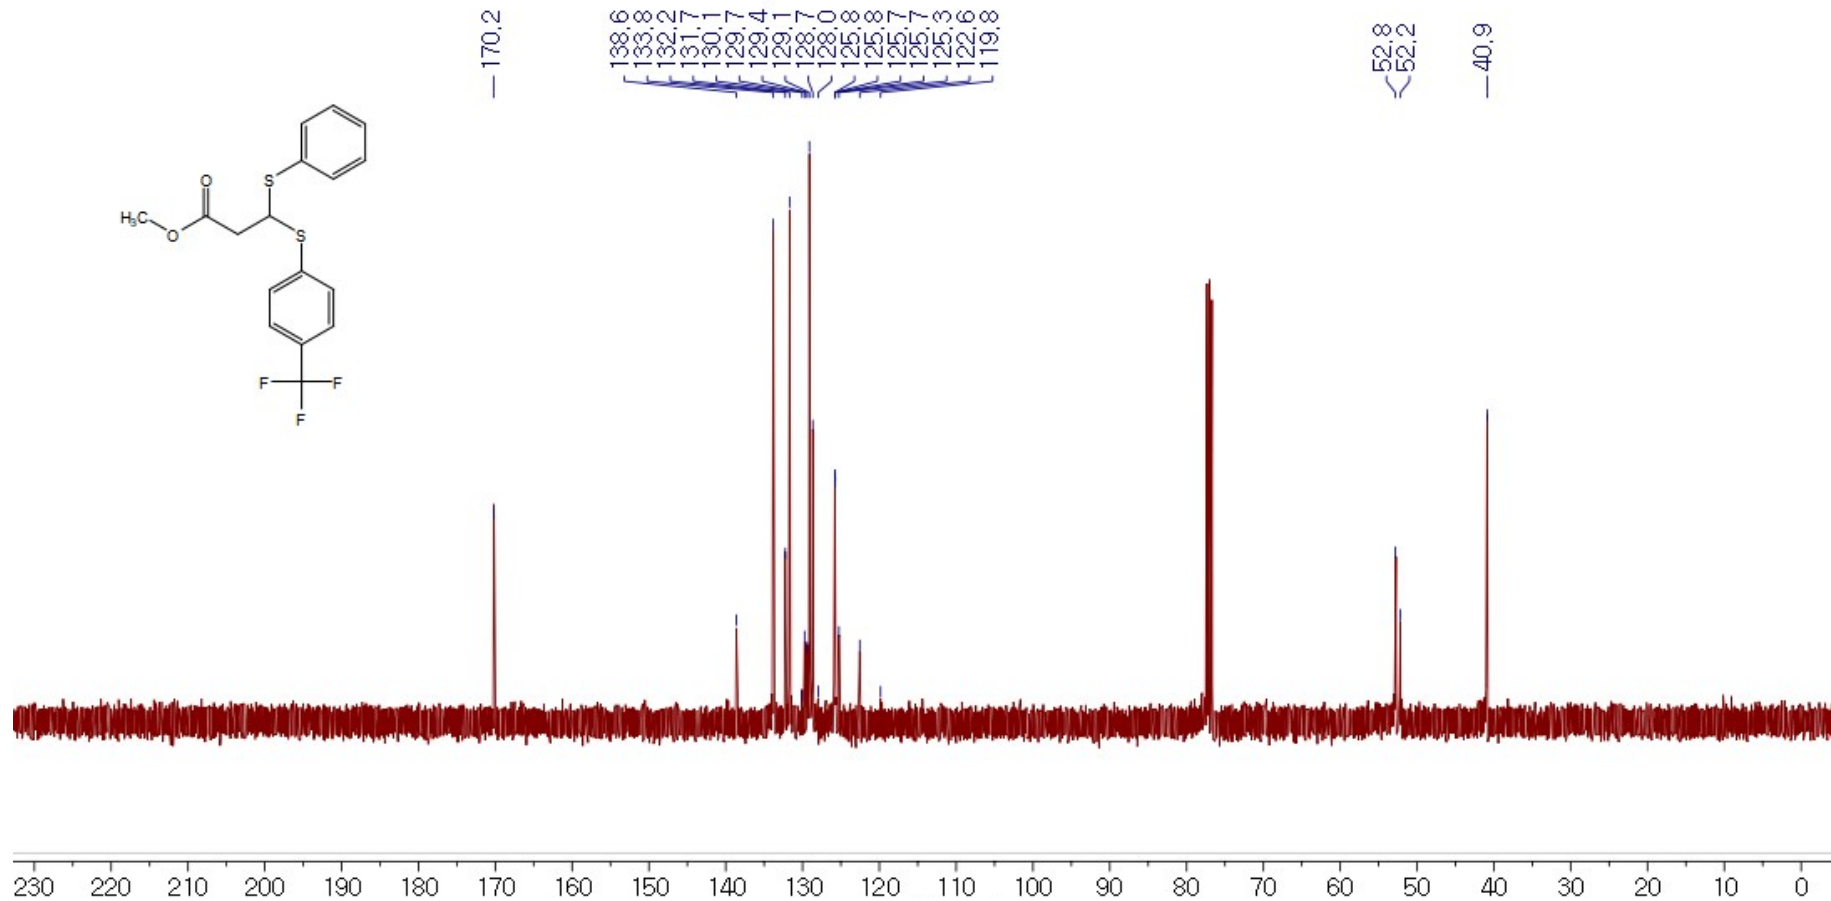

<sup>13</sup>C NMR (100 MHz, CDCl<sub>3</sub>) spectra of Methyl 3-(phenylthio)-3-((4-(trifluoromethyl)phenyl)thio)propanoate (**3gh**)



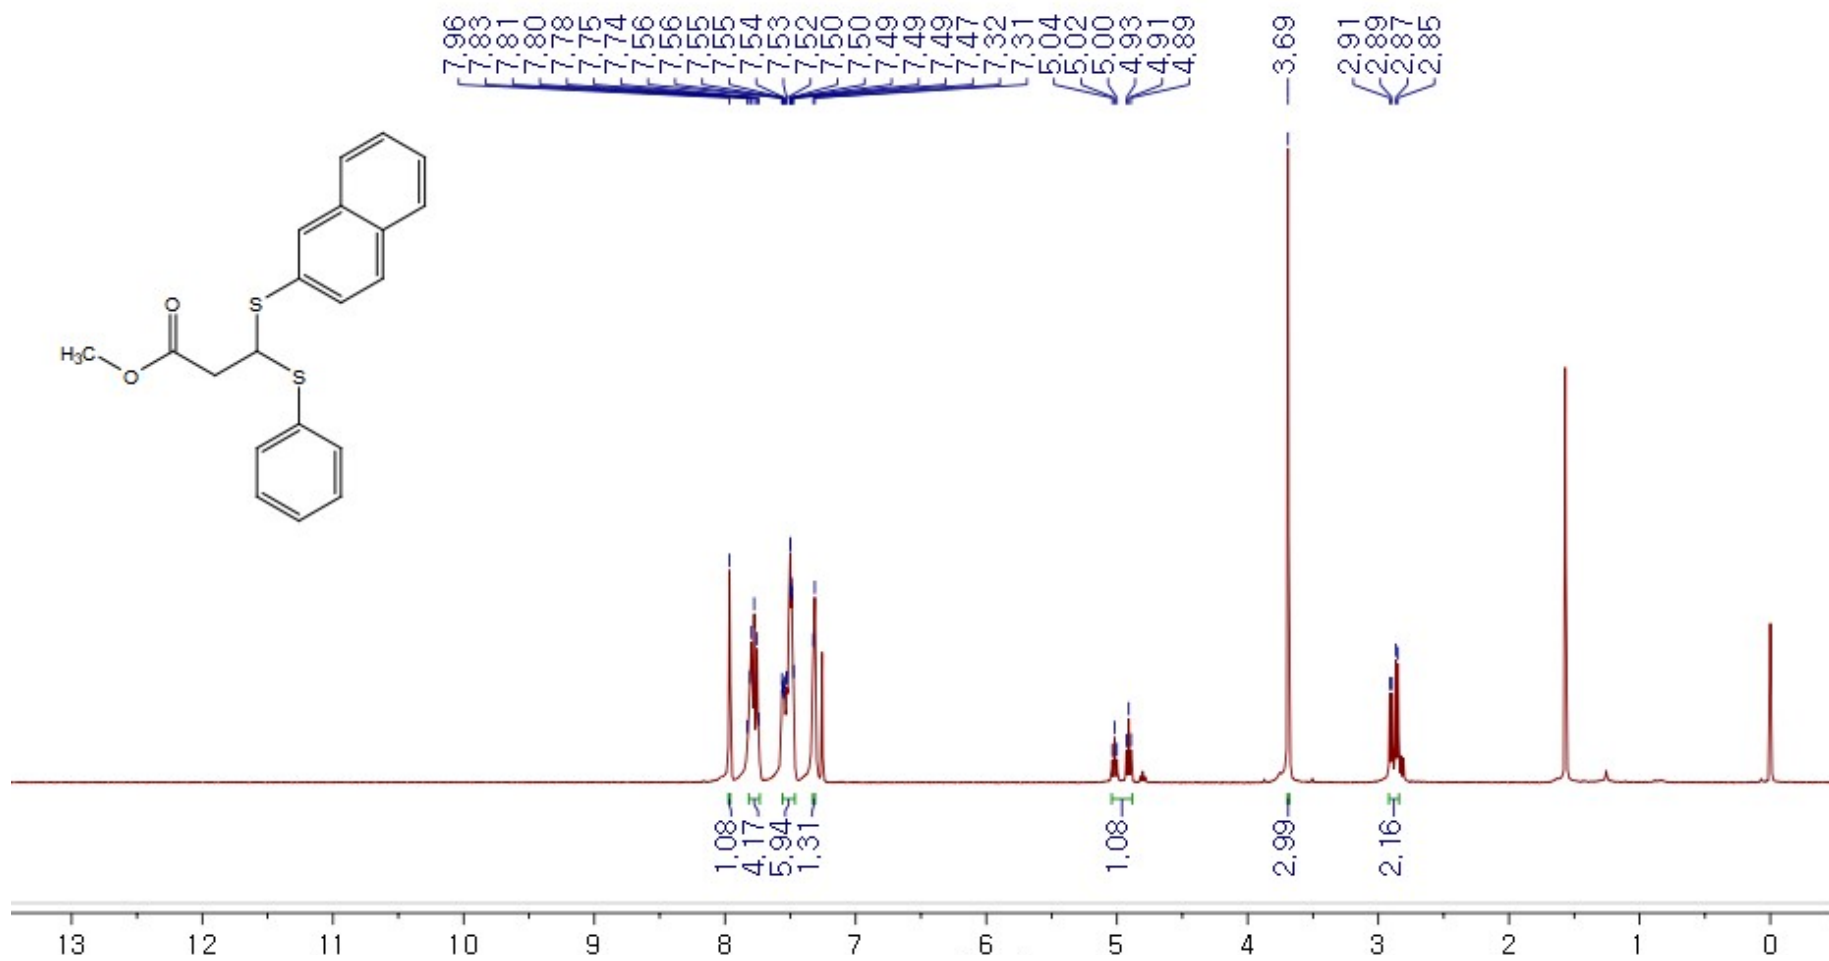

<sup>1</sup>H NMR (400 MHz, CDCl<sub>3</sub>) spectra of Methyl 3-(naphthalen-2-ylthio)-3-(phenylthio)propanoate (**3gi**)

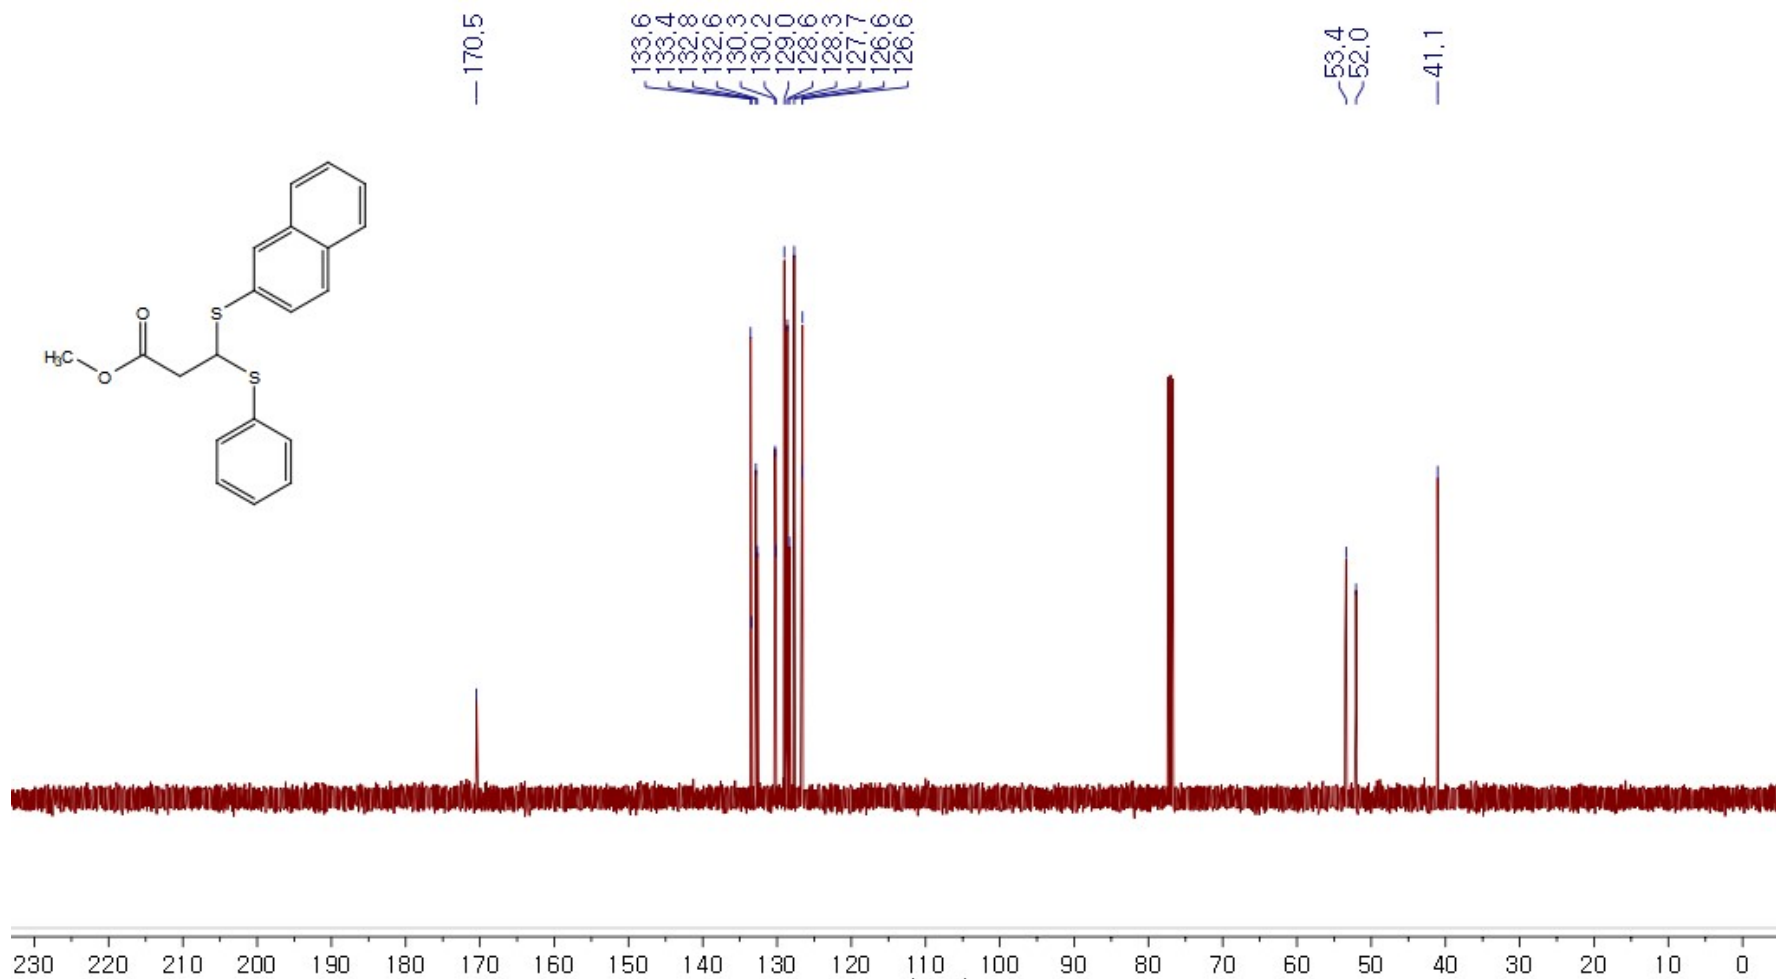

<sup>13</sup>C NMR (100 MHz, CDCl<sub>3</sub>) spectra of Methyl 3-(naphthalen-2-ylthio)-3-(phenylthio)propanoate (**3gi**)

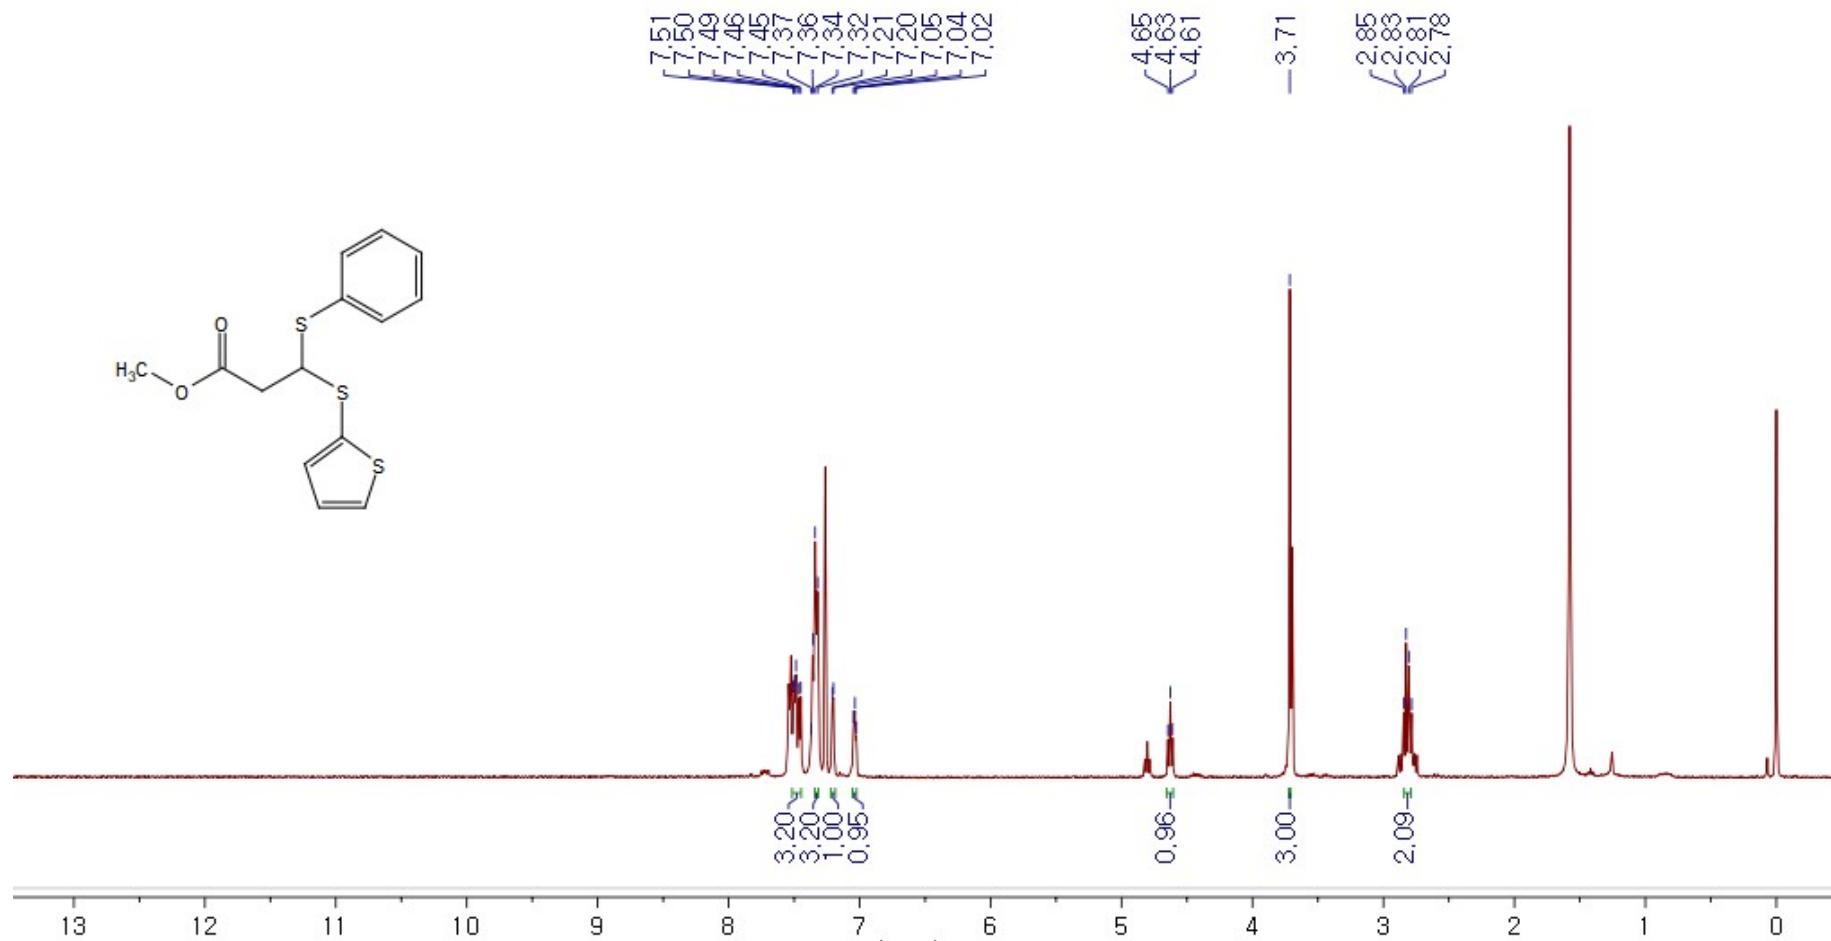

<sup>1</sup>H NMR (400 MHz, CDCl<sub>3</sub>) spectra of Methyl 3-(phenylthio)-3-(thiophen-2-ylthio)propanoate (**3gj**)

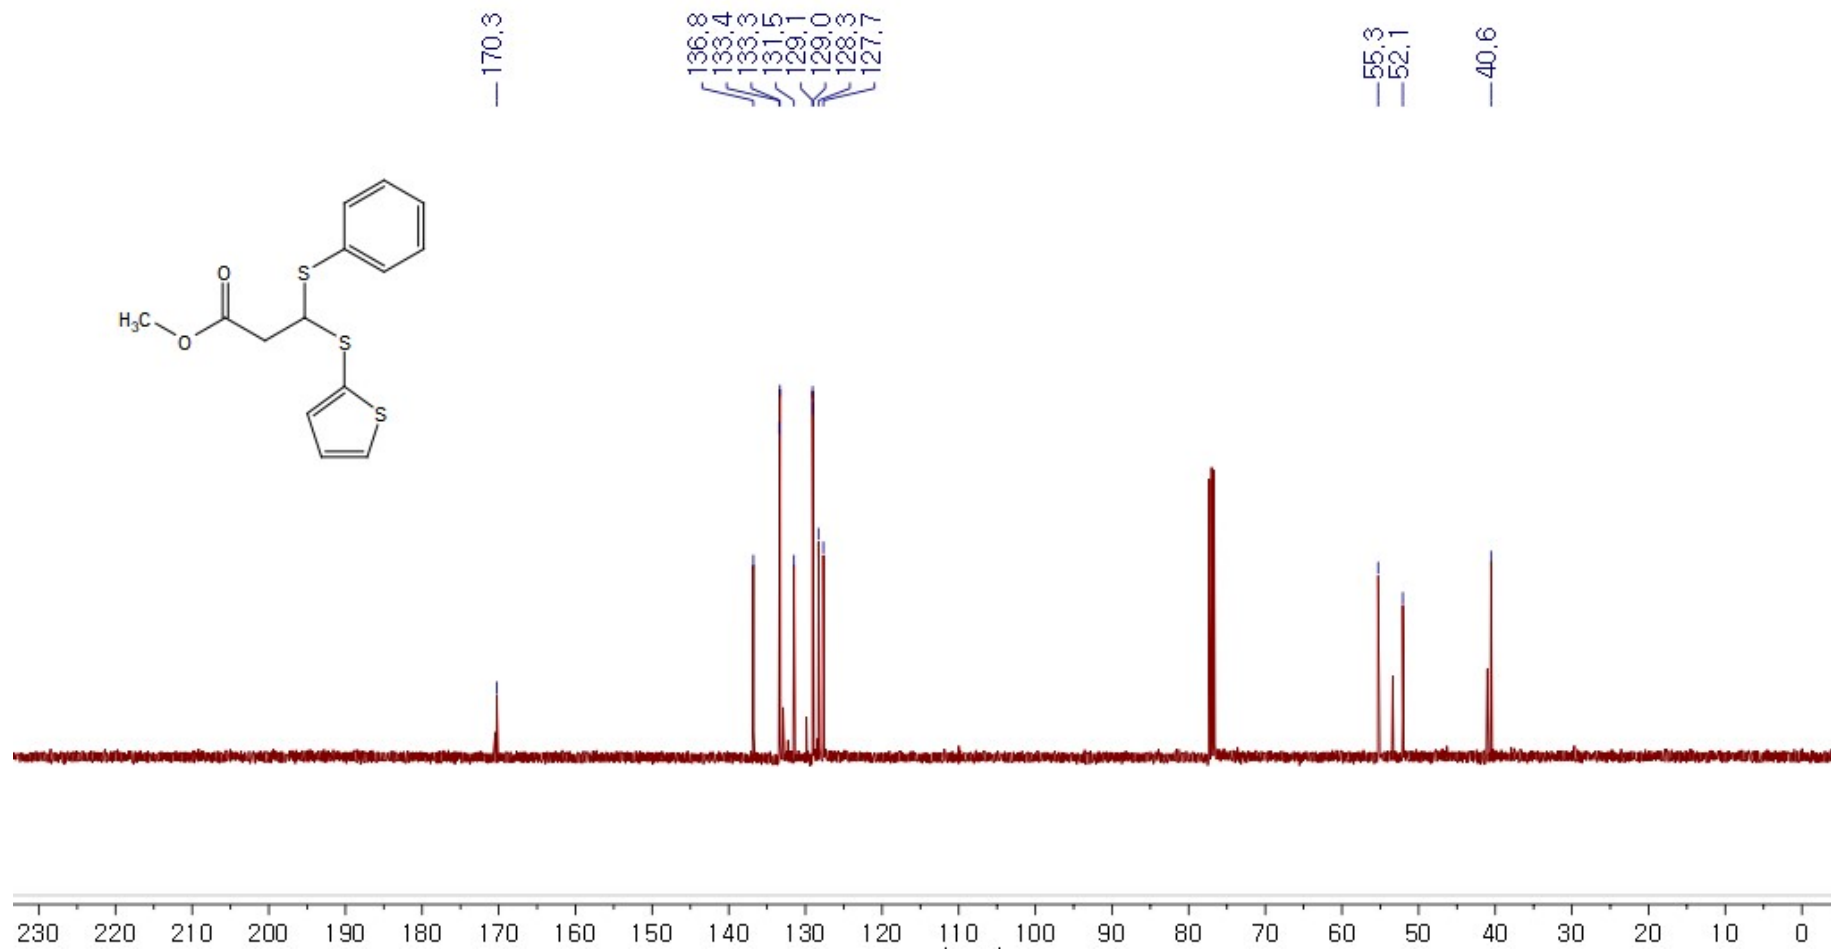

$^{13}\text{C}$  NMR (100 MHz,  $\text{CDCl}_3$ ) spectra of Methyl 3-(phenylthio)-3-(thiophen-2-ylthio)propanoate (**3gj**)

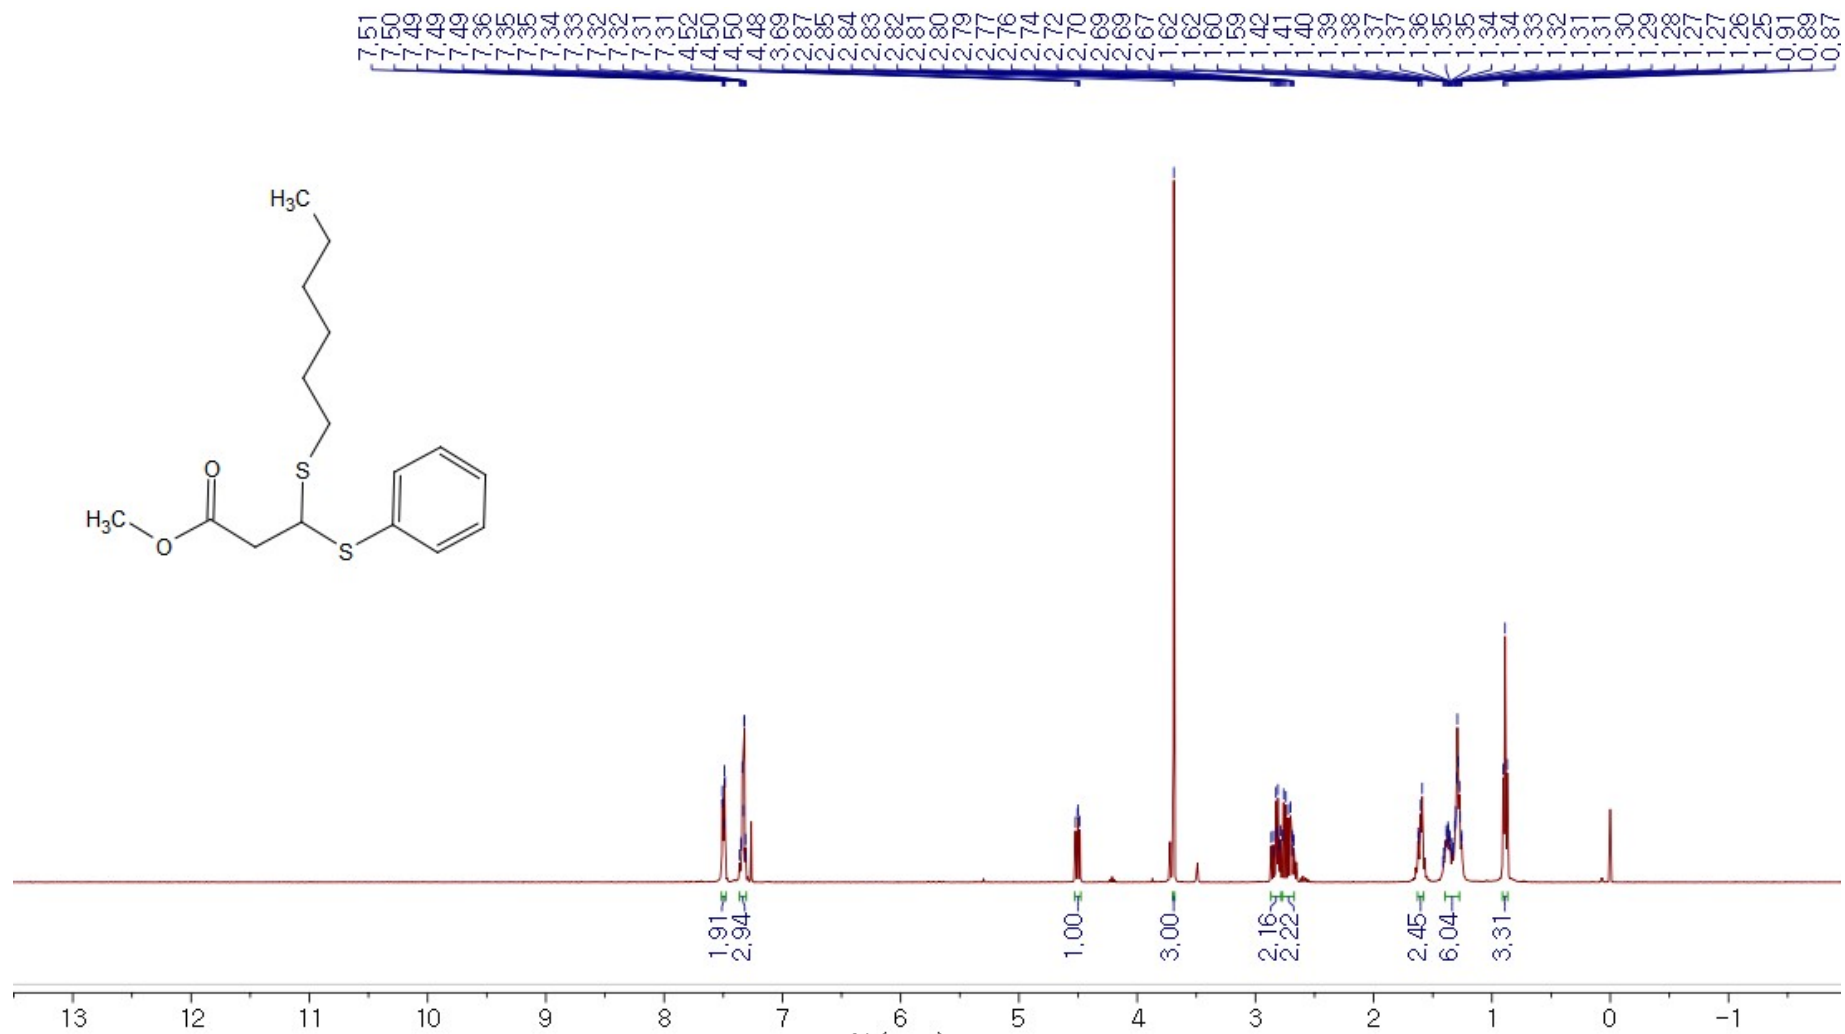

$^1\text{H}$  NMR (400 MHz,  $\text{CDCl}_3$ ) spectra of Methyl 3-(hexylthio)-3-(phenylthio)propanoate (**3gl**)

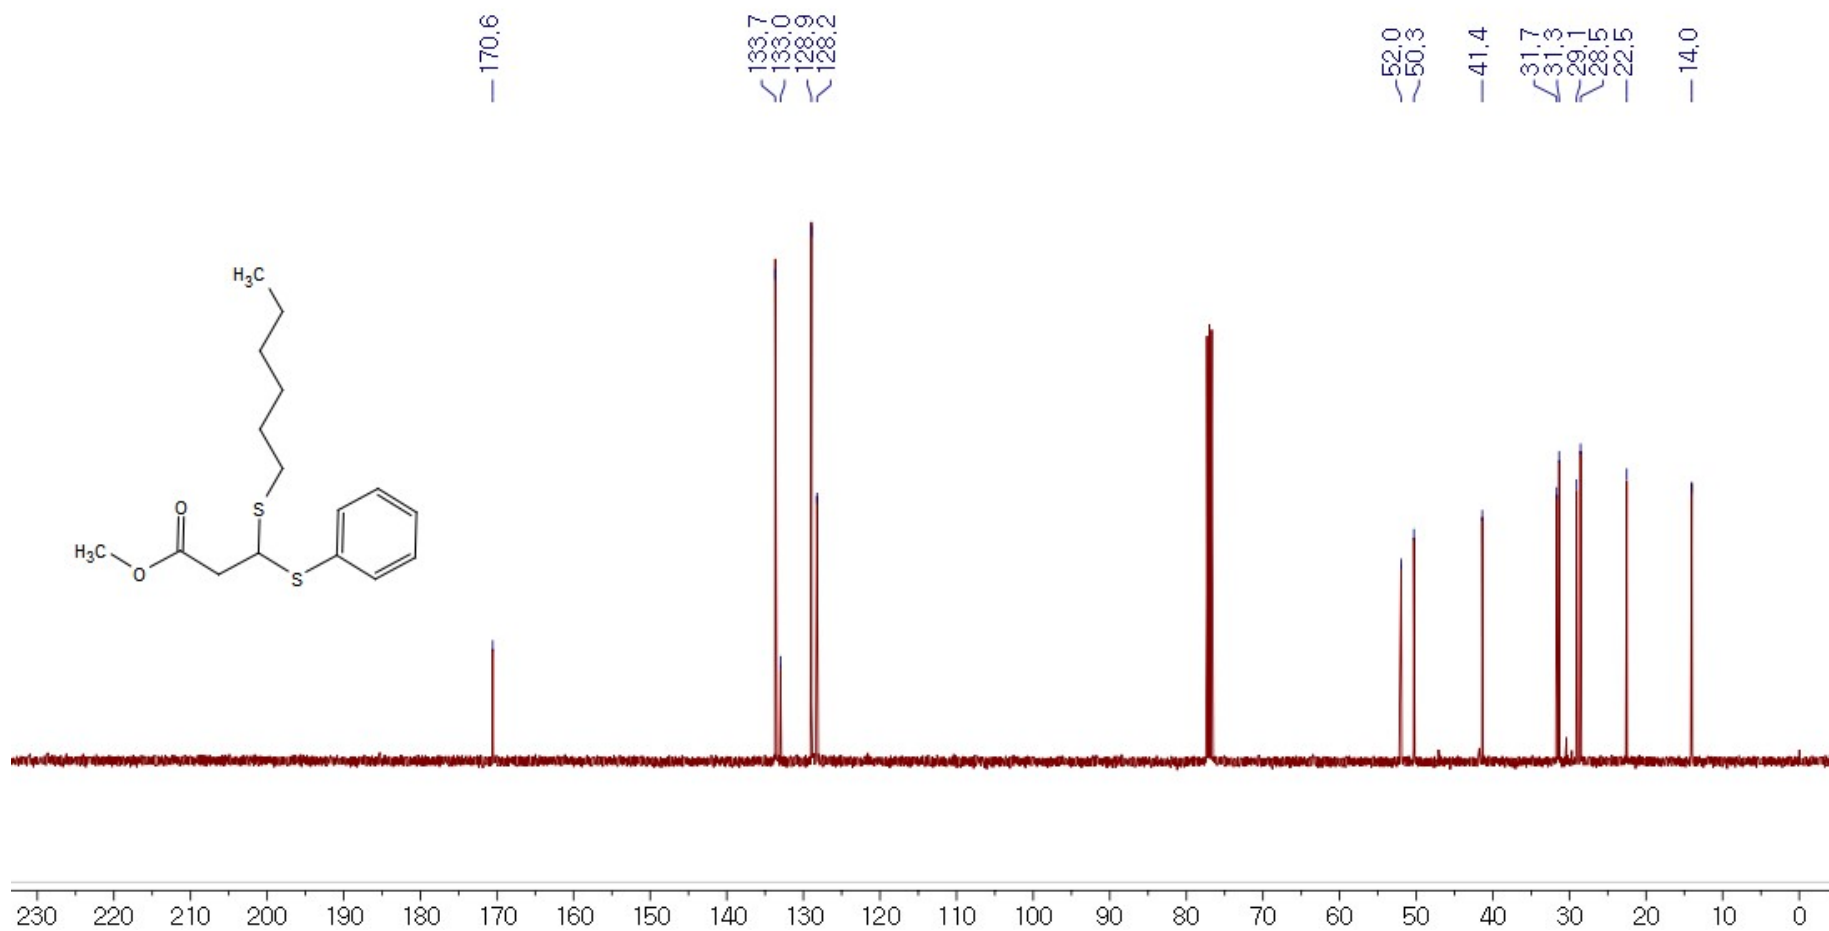

<sup>13</sup>C NMR (100 MHz, CDCl<sub>3</sub>) spectra of Methyl 3-(hexylthio)-3-(phenylthio)propanoate (**3gl**)

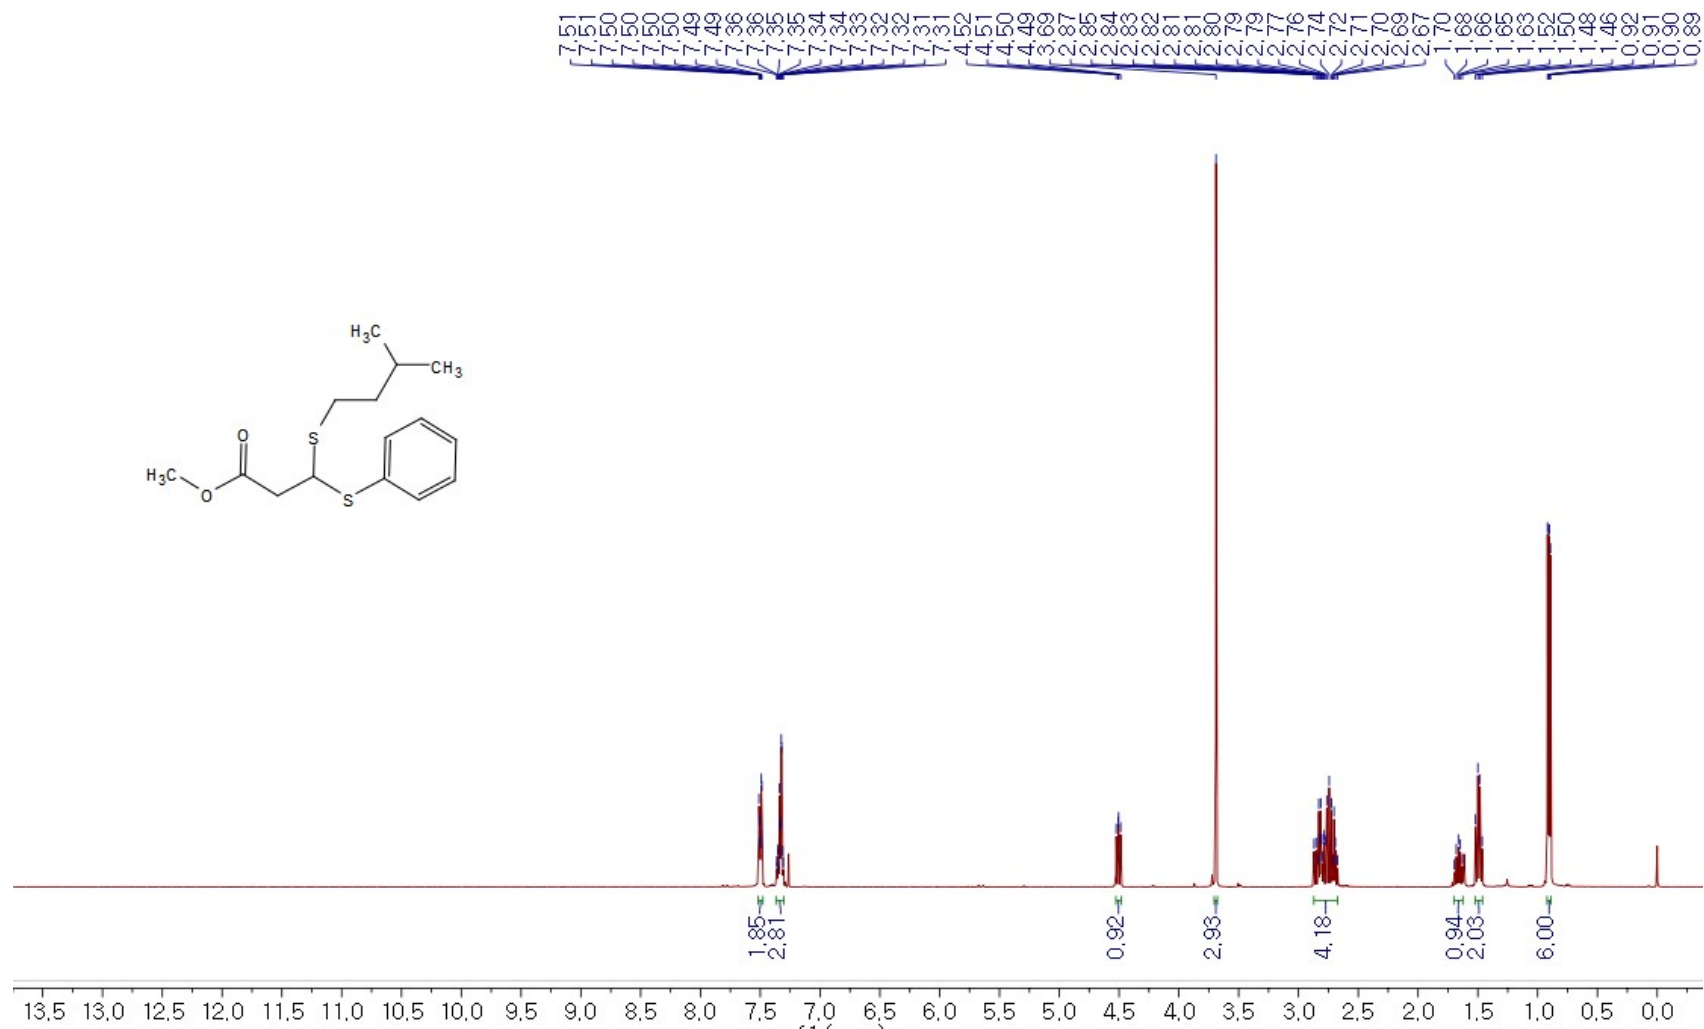

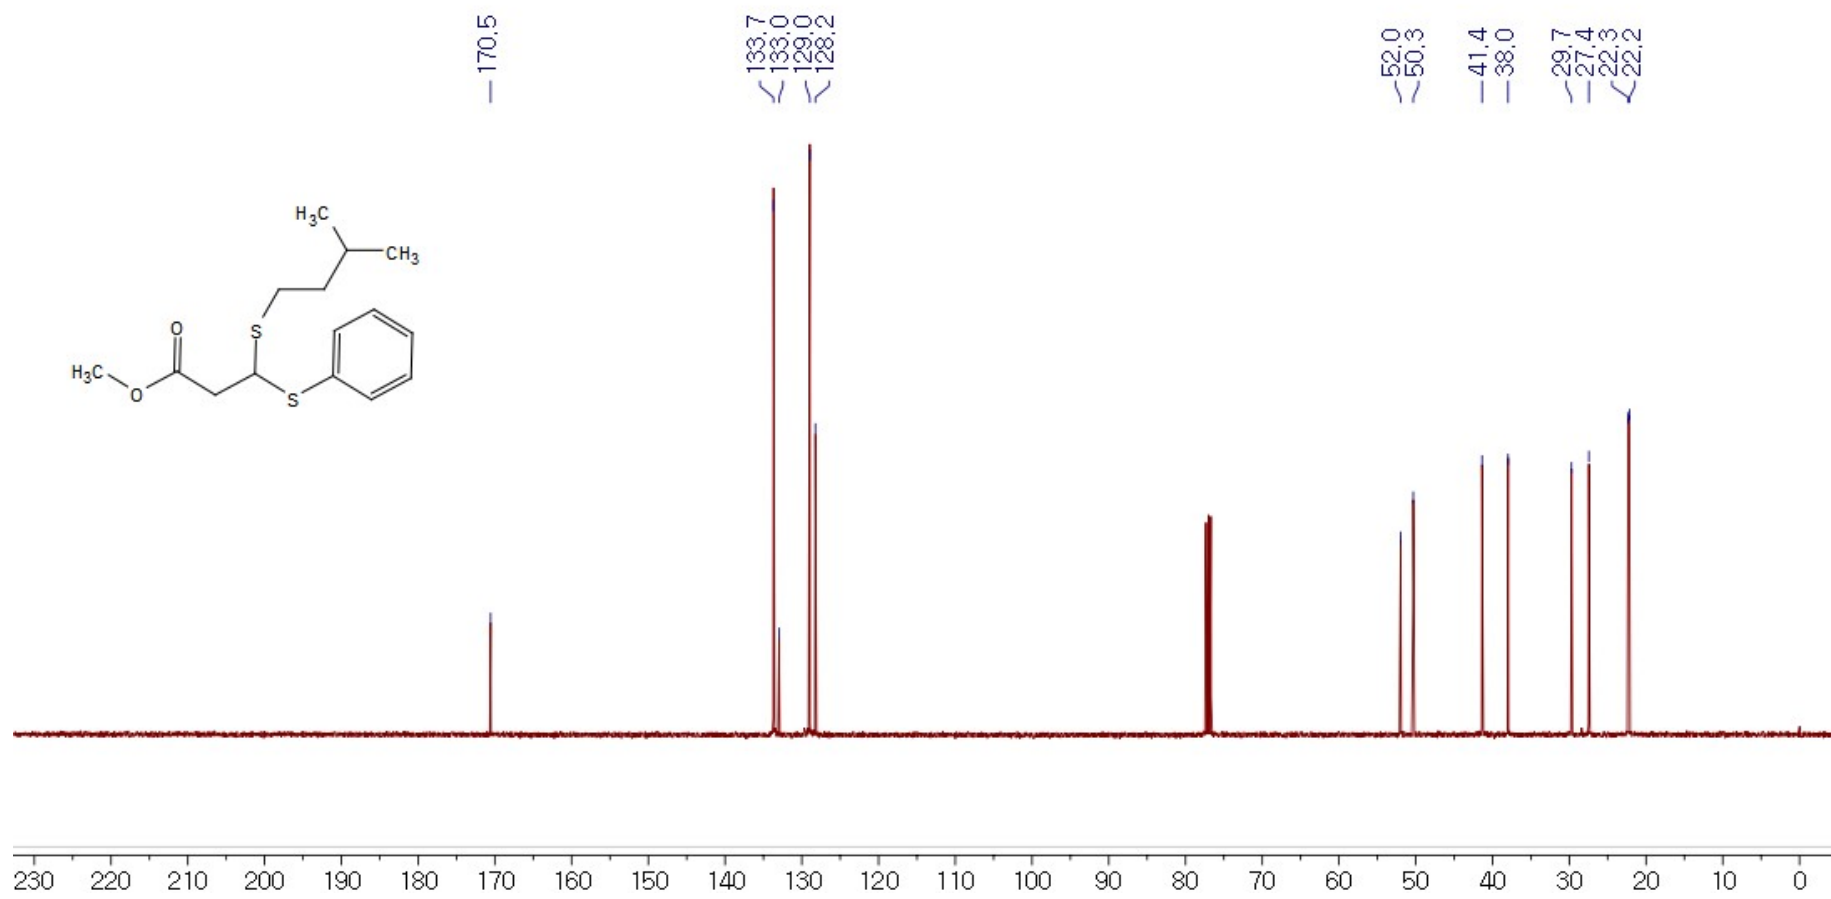

$^{13}\text{C}$  NMR (100 MHz,  $\text{CDCl}_3$ ) spectra of Methyl 3-(isopentylthio)-3-(phenylthio)propanoate (**3go**)



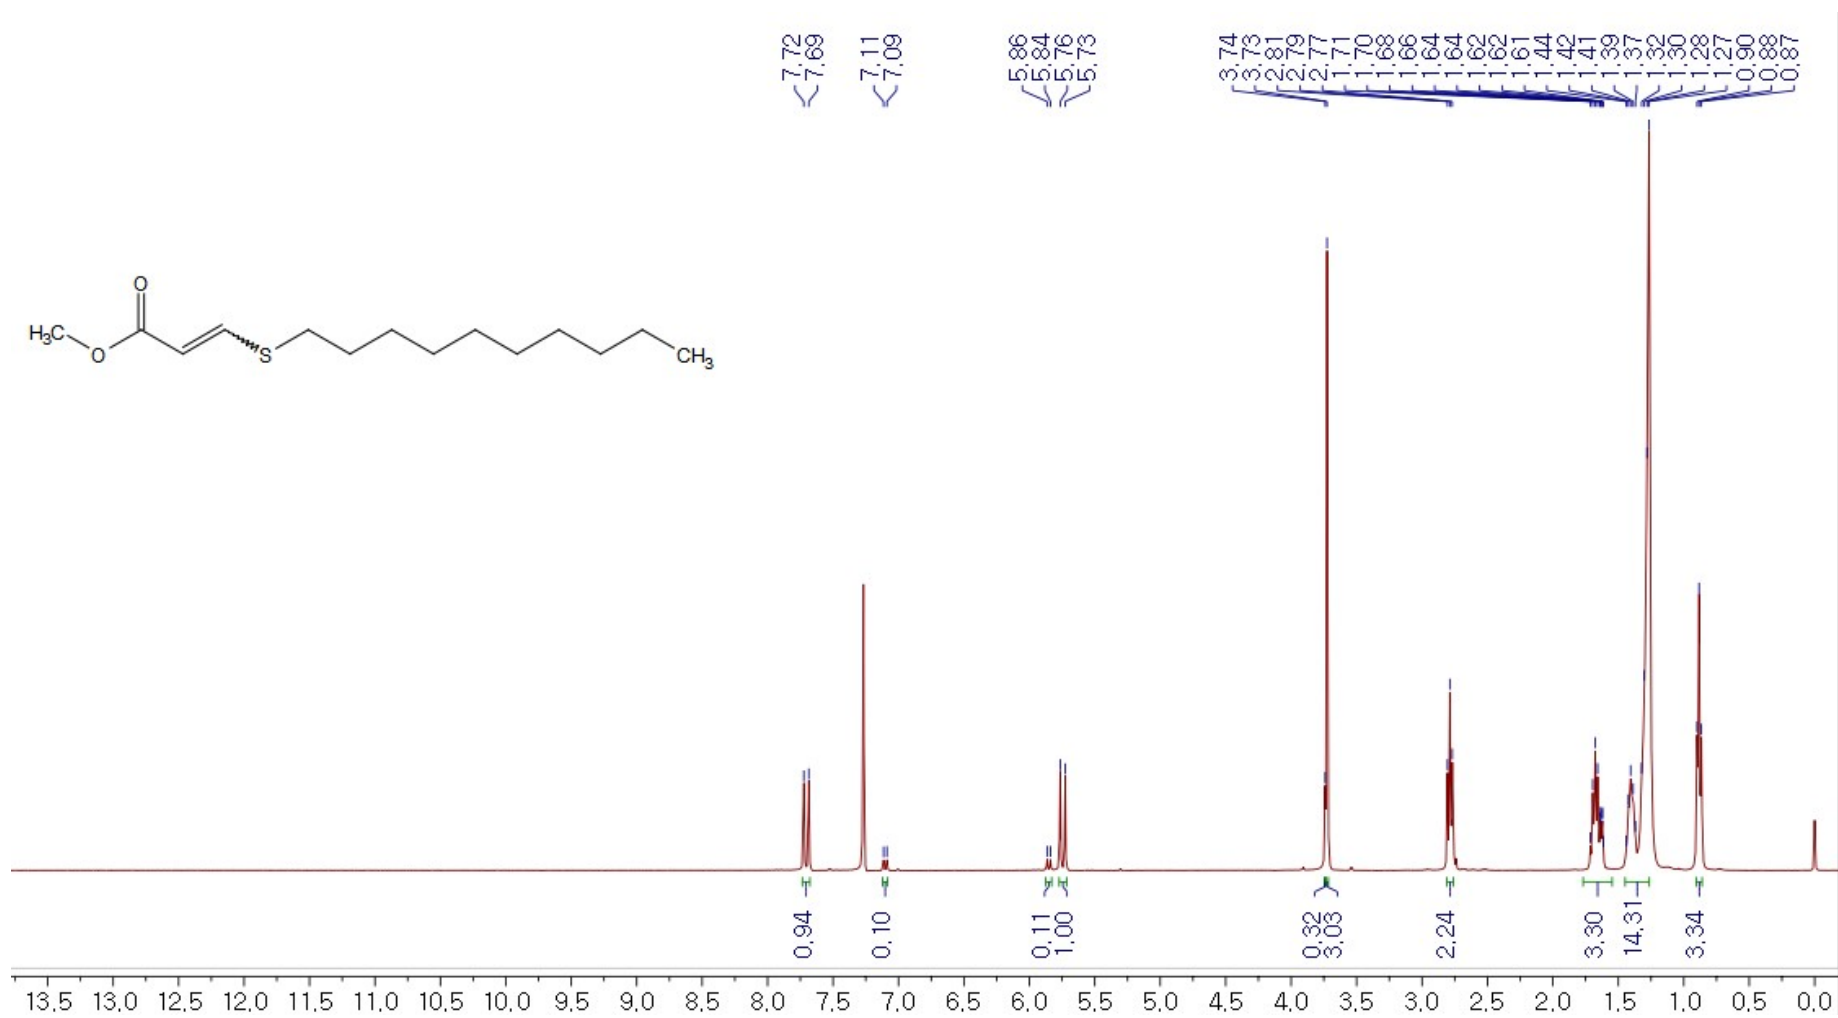

$^1\text{H}$  NMR (400 MHz,  $\text{CDCl}_3$ ) spectra of Methyl 3-(decylthio)acrylate (**1a**)

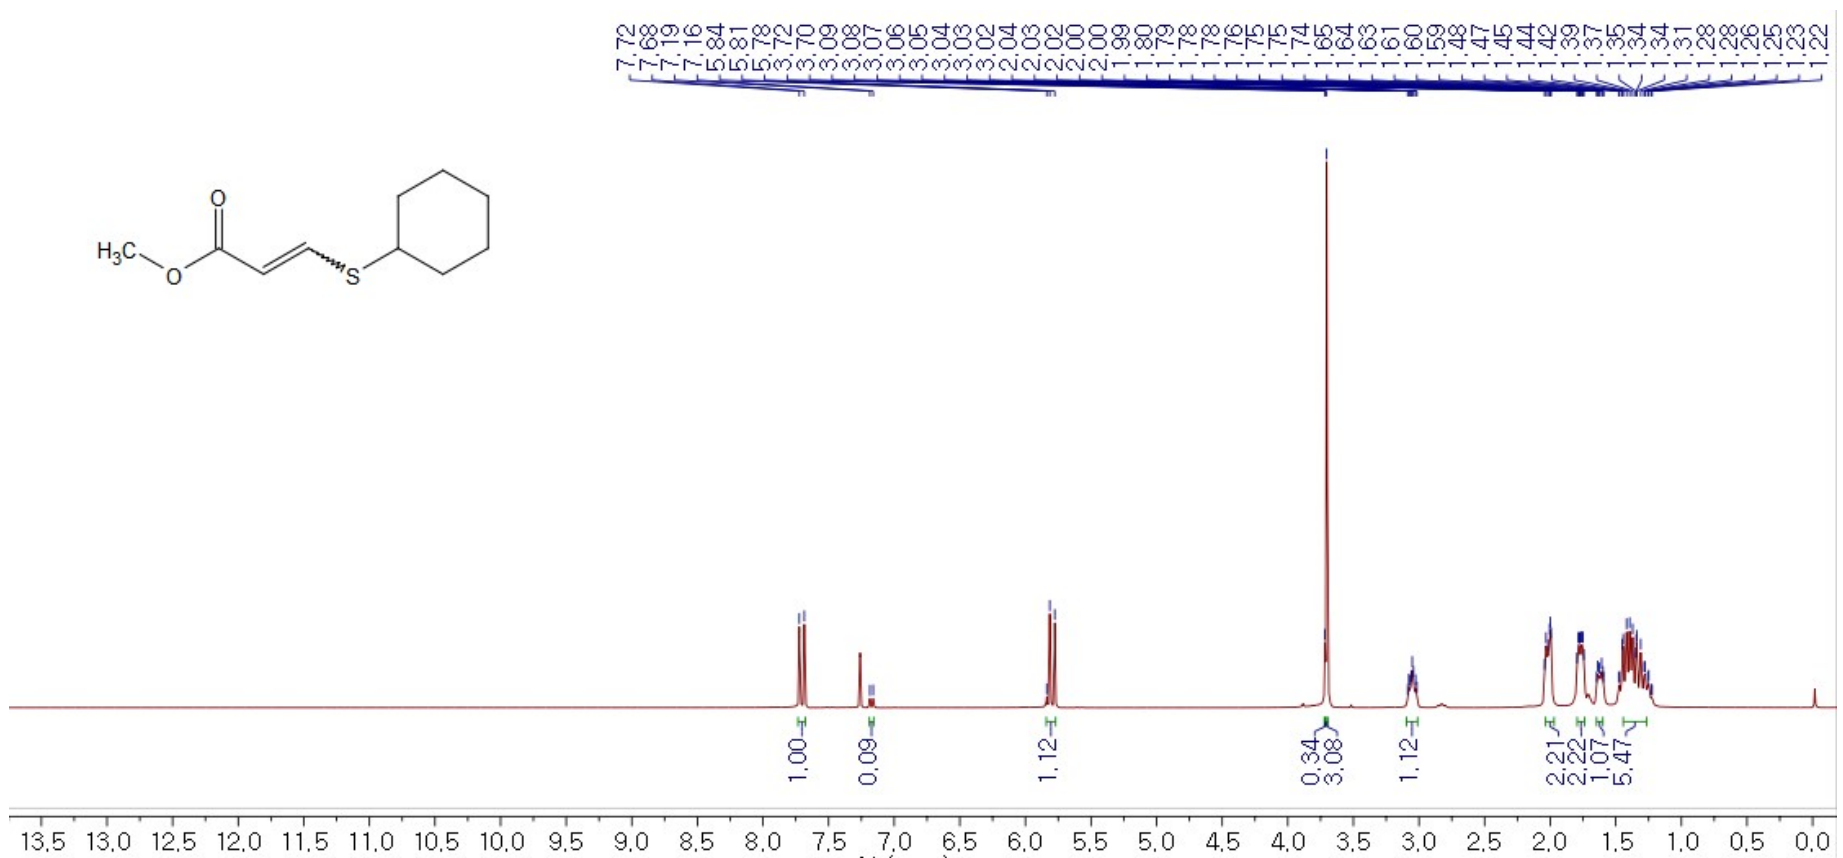

<sup>1</sup>H NMR (400 MHz, CDCl<sub>3</sub>) spectra of Methyl 3-(cyclohexylthio)acrylate (**1b**)

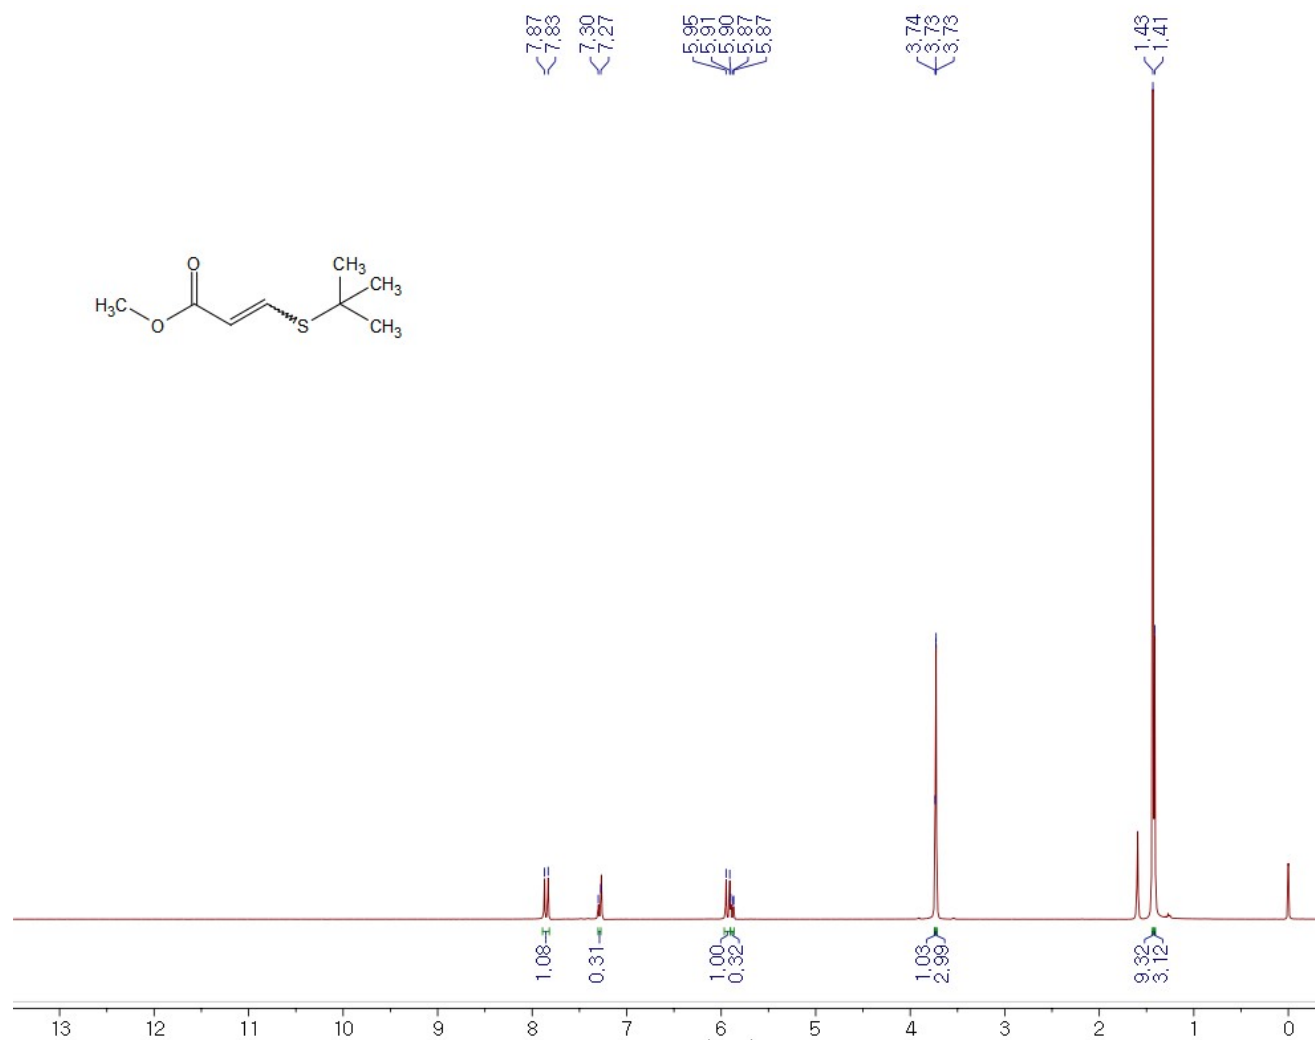

<sup>1</sup>H NMR (400 MHz, CDCl<sub>3</sub>) spectra of Methyl 3-(tert-butylthio)acrylate (**1c**)

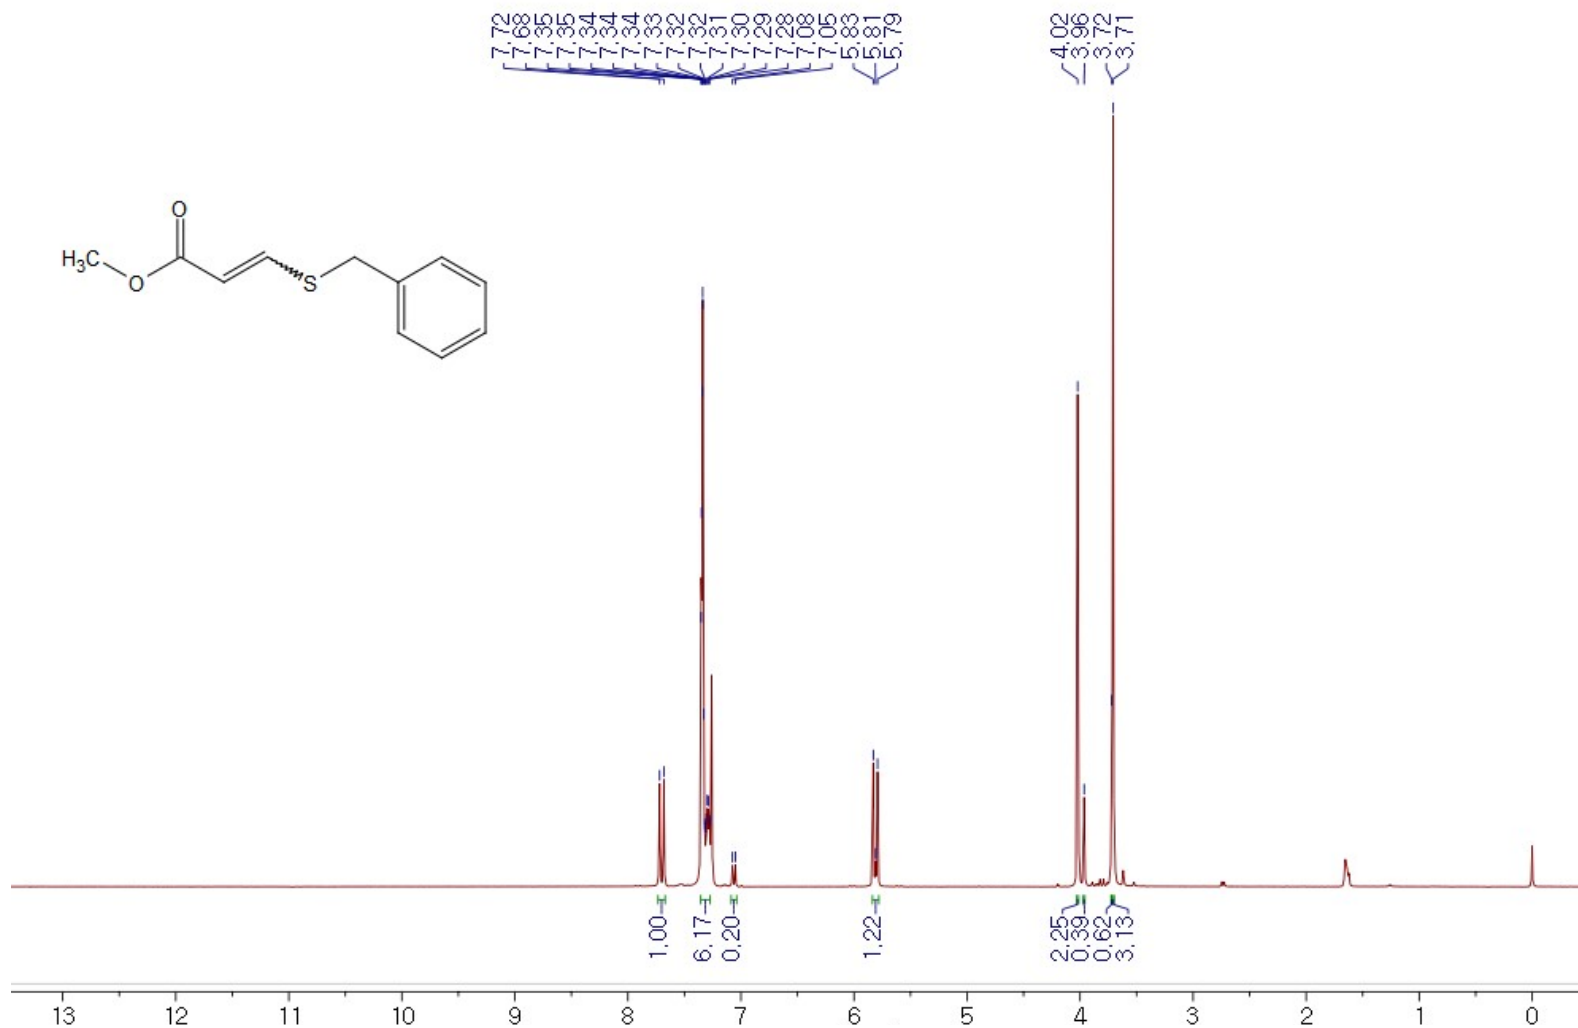

<sup>1</sup>H NMR (400 MHz, CDCl<sub>3</sub>) spectra of Methyl 3-(benzylthio)acrylate (**1d**)

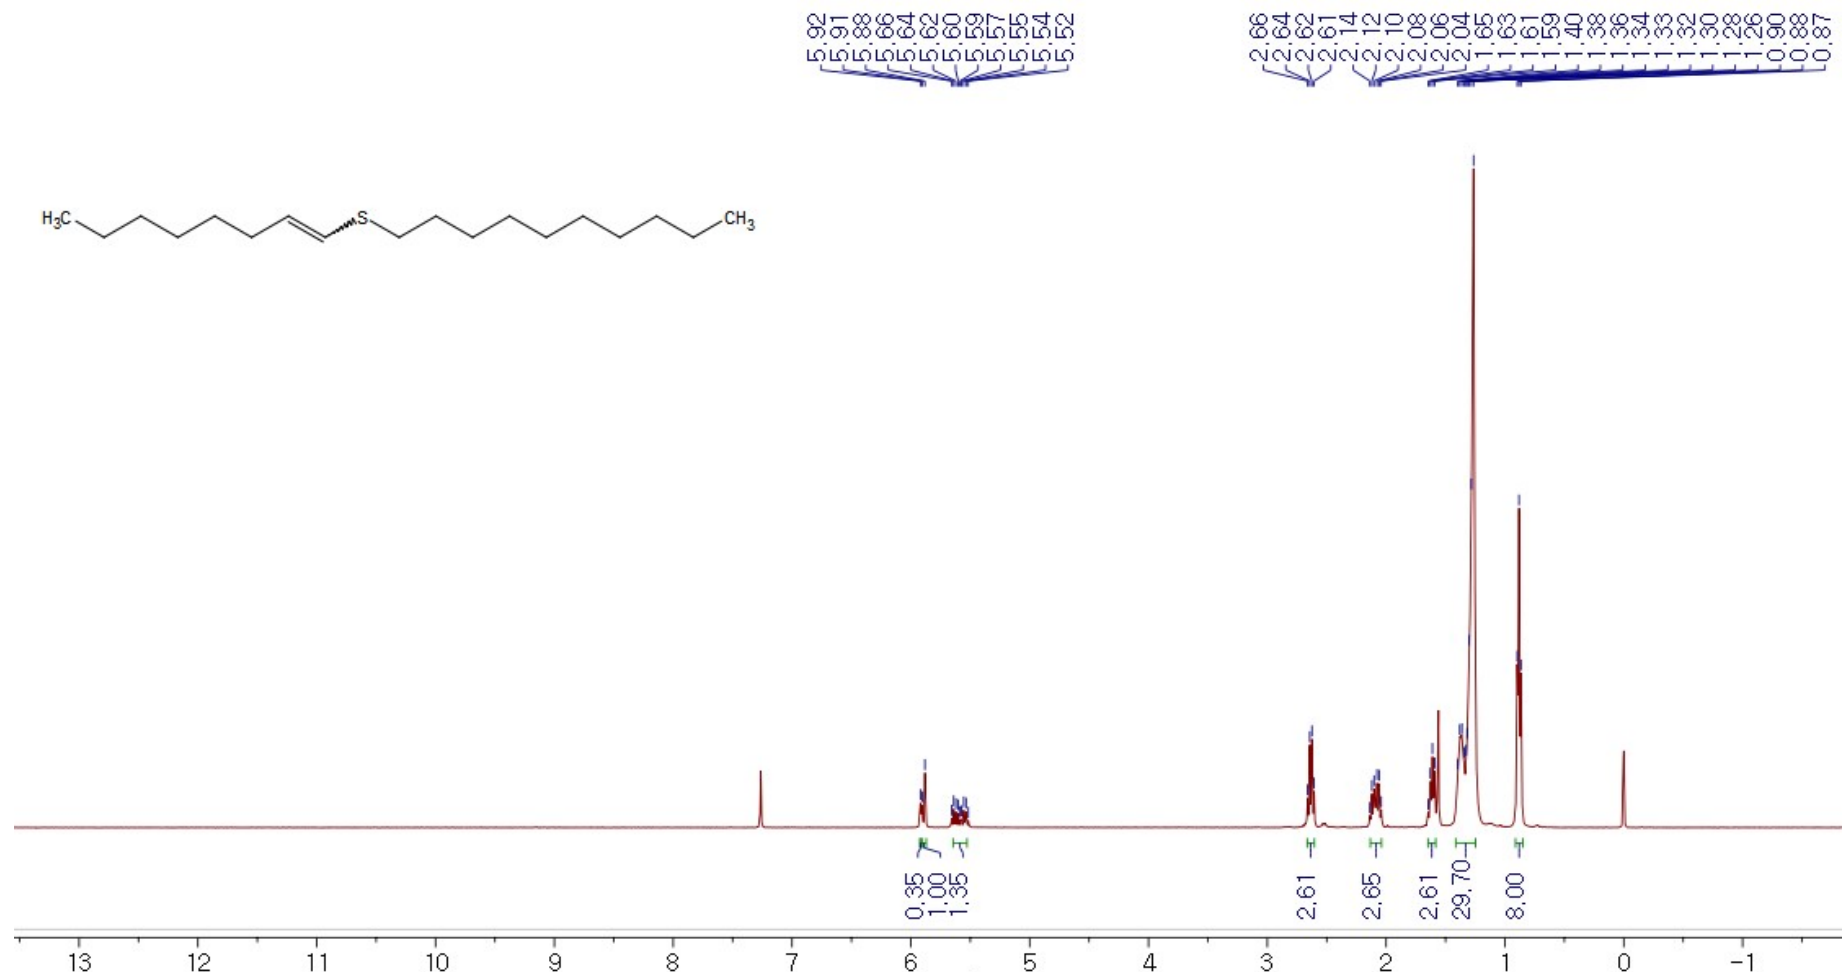

<sup>1</sup>H NMR (400 MHz, CDCl<sub>3</sub>) spectra of decyl(oct-1-en-1-yl)sulfane (1e)

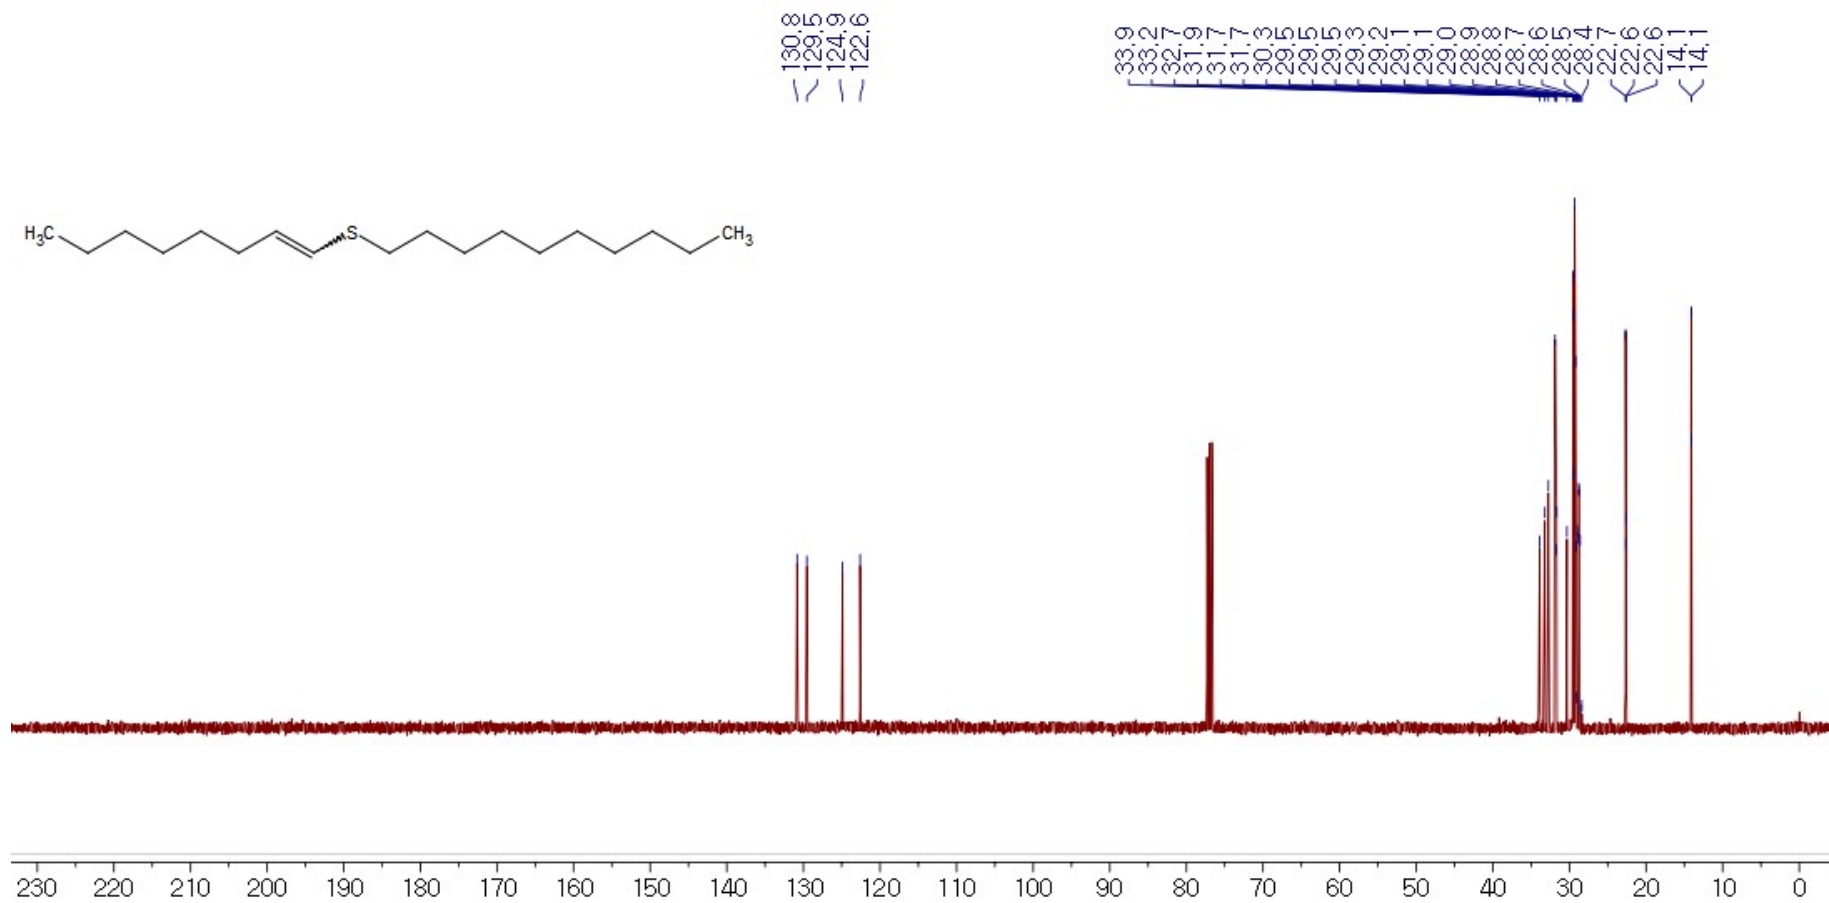

<sup>13</sup>C NMR (100 MHz, CDCl<sub>3</sub>) spectra of decyl(oct-1-en-1-yl)sulfane (**1e**)

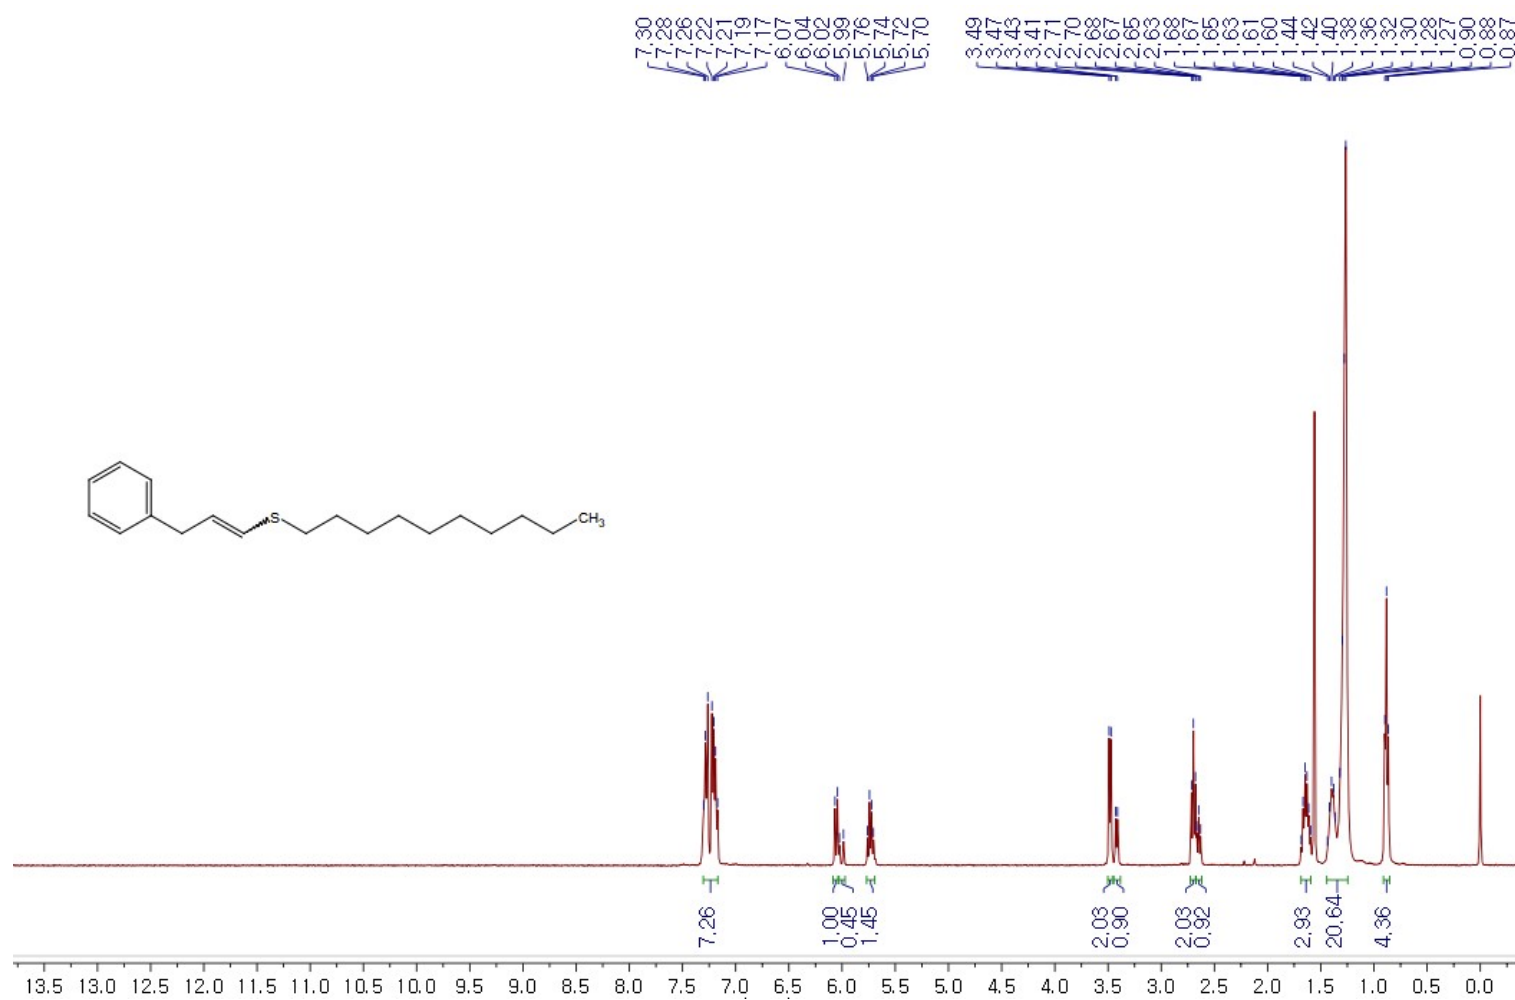

$^1\text{H}$  NMR (400 MHz,  $\text{CDCl}_3$ ) spectra of decyl(3-phenylprop-1-en-1-yl)sulfane (**1f**)

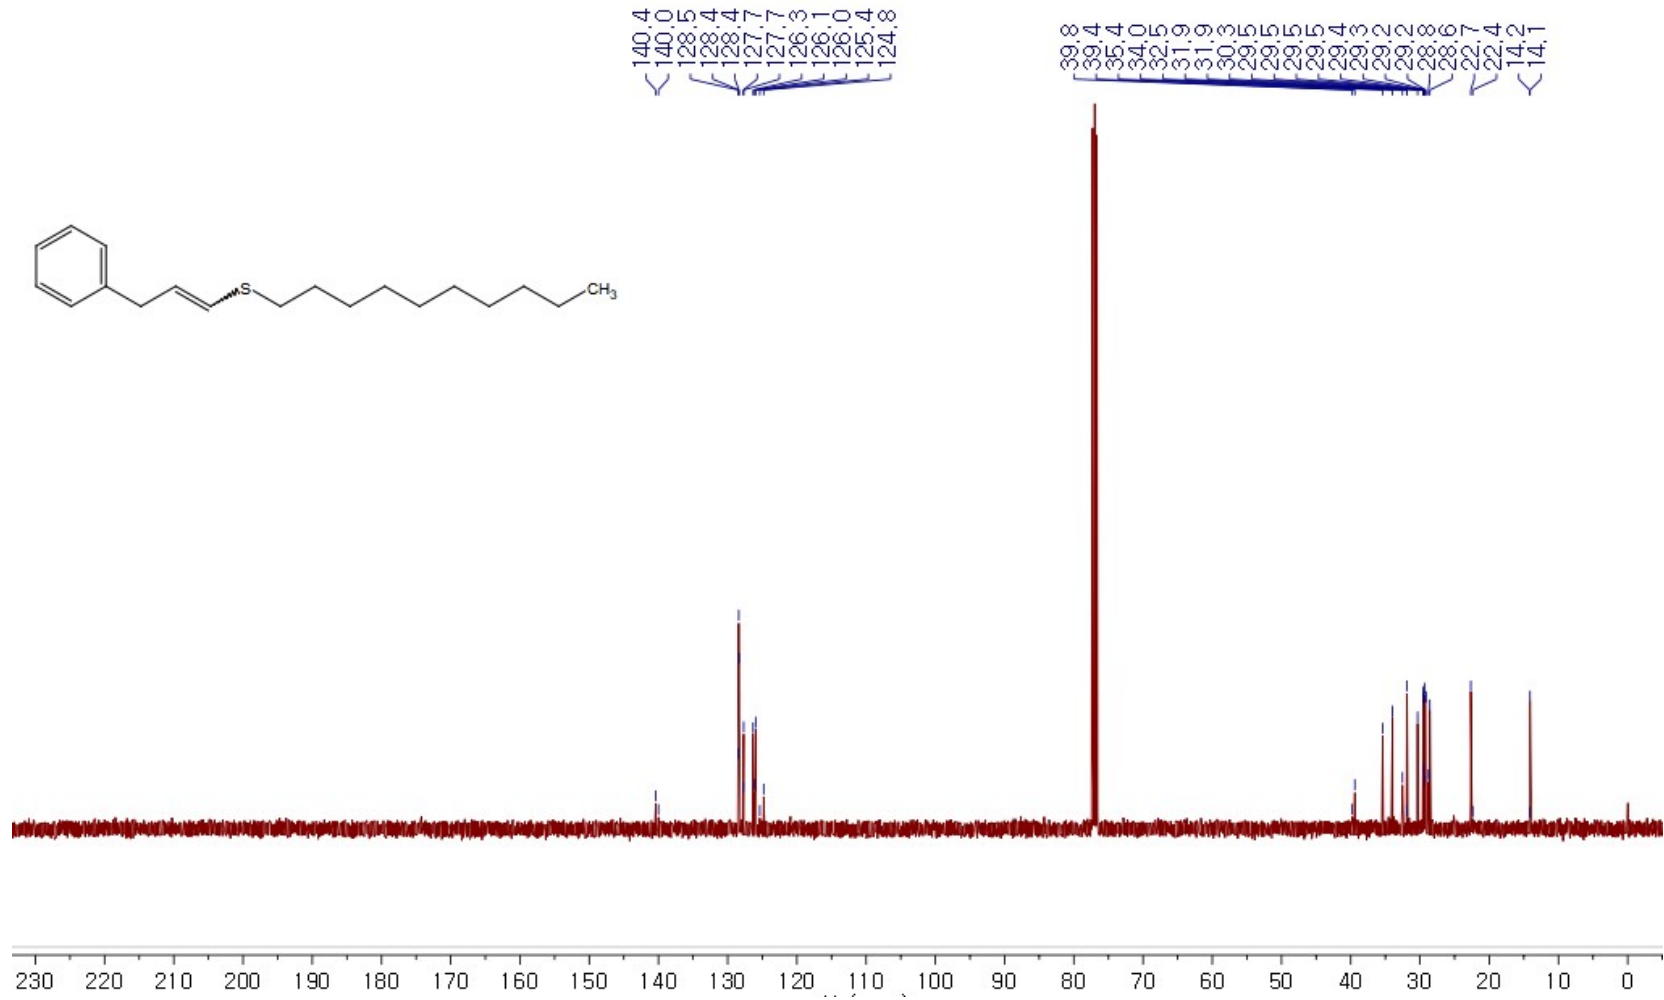

<sup>13</sup>C NMR (100 MHz, CDCl<sub>3</sub>) spectra of decyl(3-phenylprop-1-en-1-yl)sulfane (**1f**)



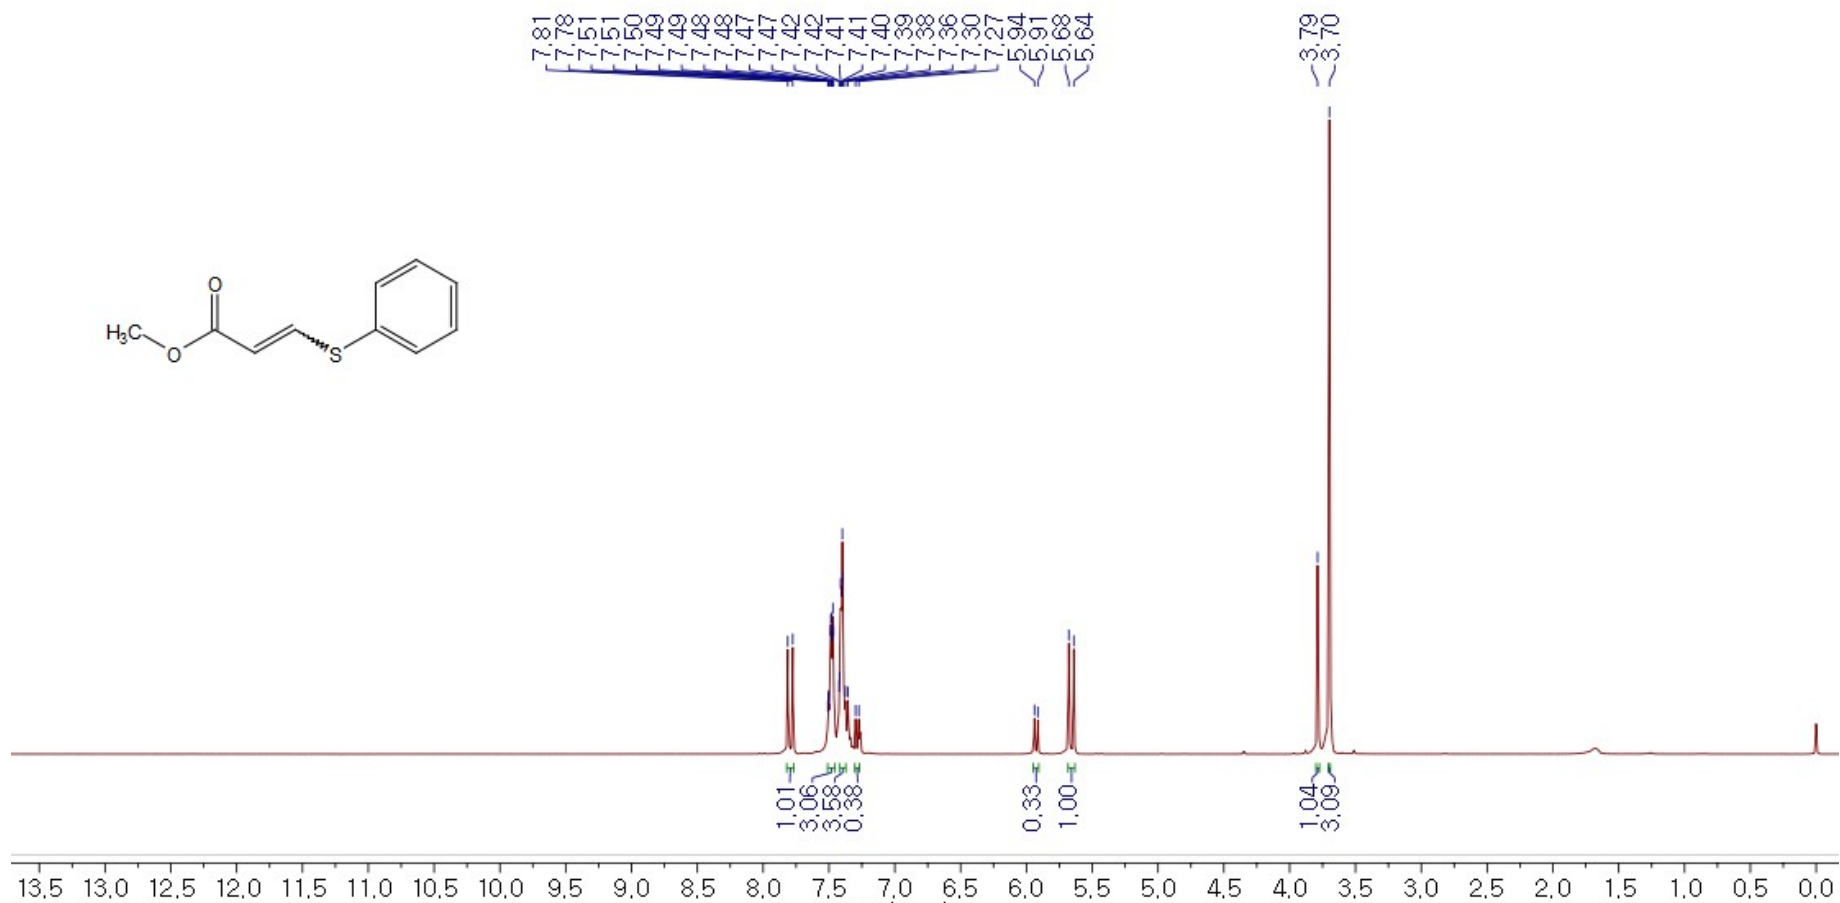

<sup>1</sup>H NMR (400 MHz, CDCl<sub>3</sub>) spectra of Methyl 3-(phenylthio)acrylate (**1g**)
